# Supplementary material for: [60]Fullerene cycloaddition across hindered acenes
Source: Royal Society of Chemistry journal article supplement (doi:10.1039/b710300j), 2007-11-06

# **[60]Fullerene Cycloaddition Across Hindered Acenes**

**Irvinder Kaur and Glen P. Miller\***

**Department of Chemistry and Materials Science Program**

**University of New Hampshire**

**23 College Rd. Durham, NH 03824**

**[glen.miller@unh.edu](mailto:glen.miller@unh.edu)**

## 6,13-Bis(2',6'-dimethylphenyl)-6,13-dihydropentacene-6,13-diol

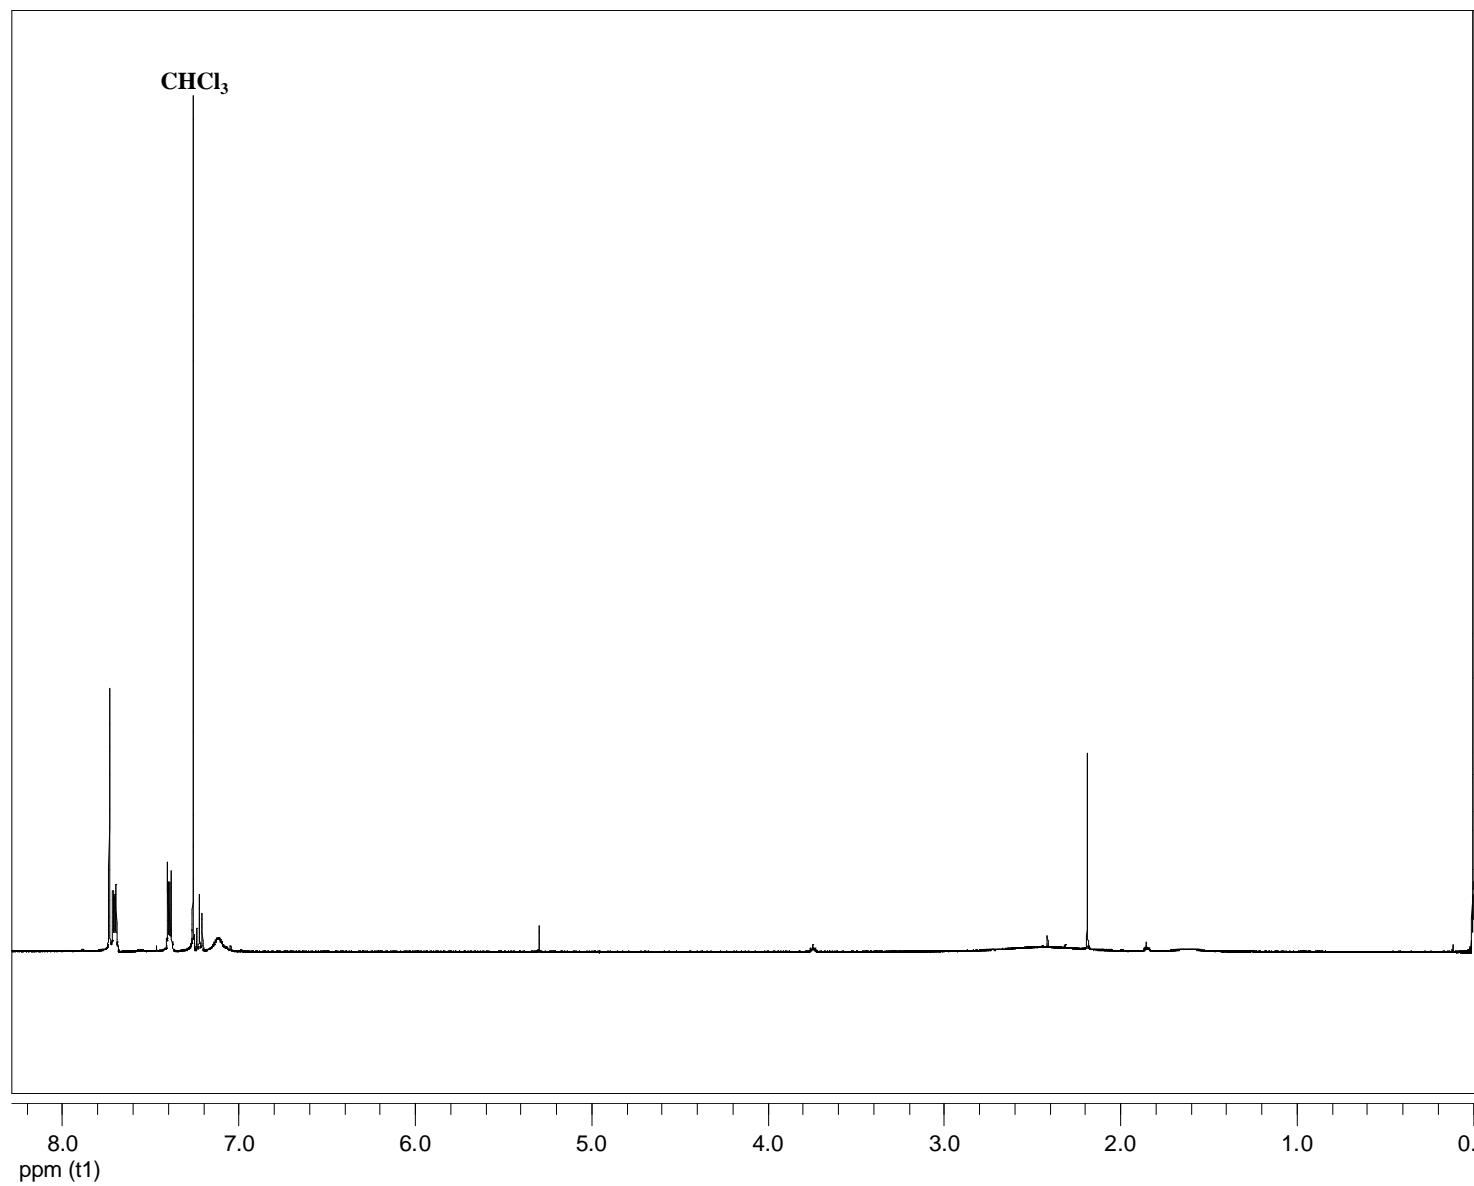

## 6,13-Bis(2',6'-dimethylphenyl)-6,13-dihydropentacene-6,13-diol

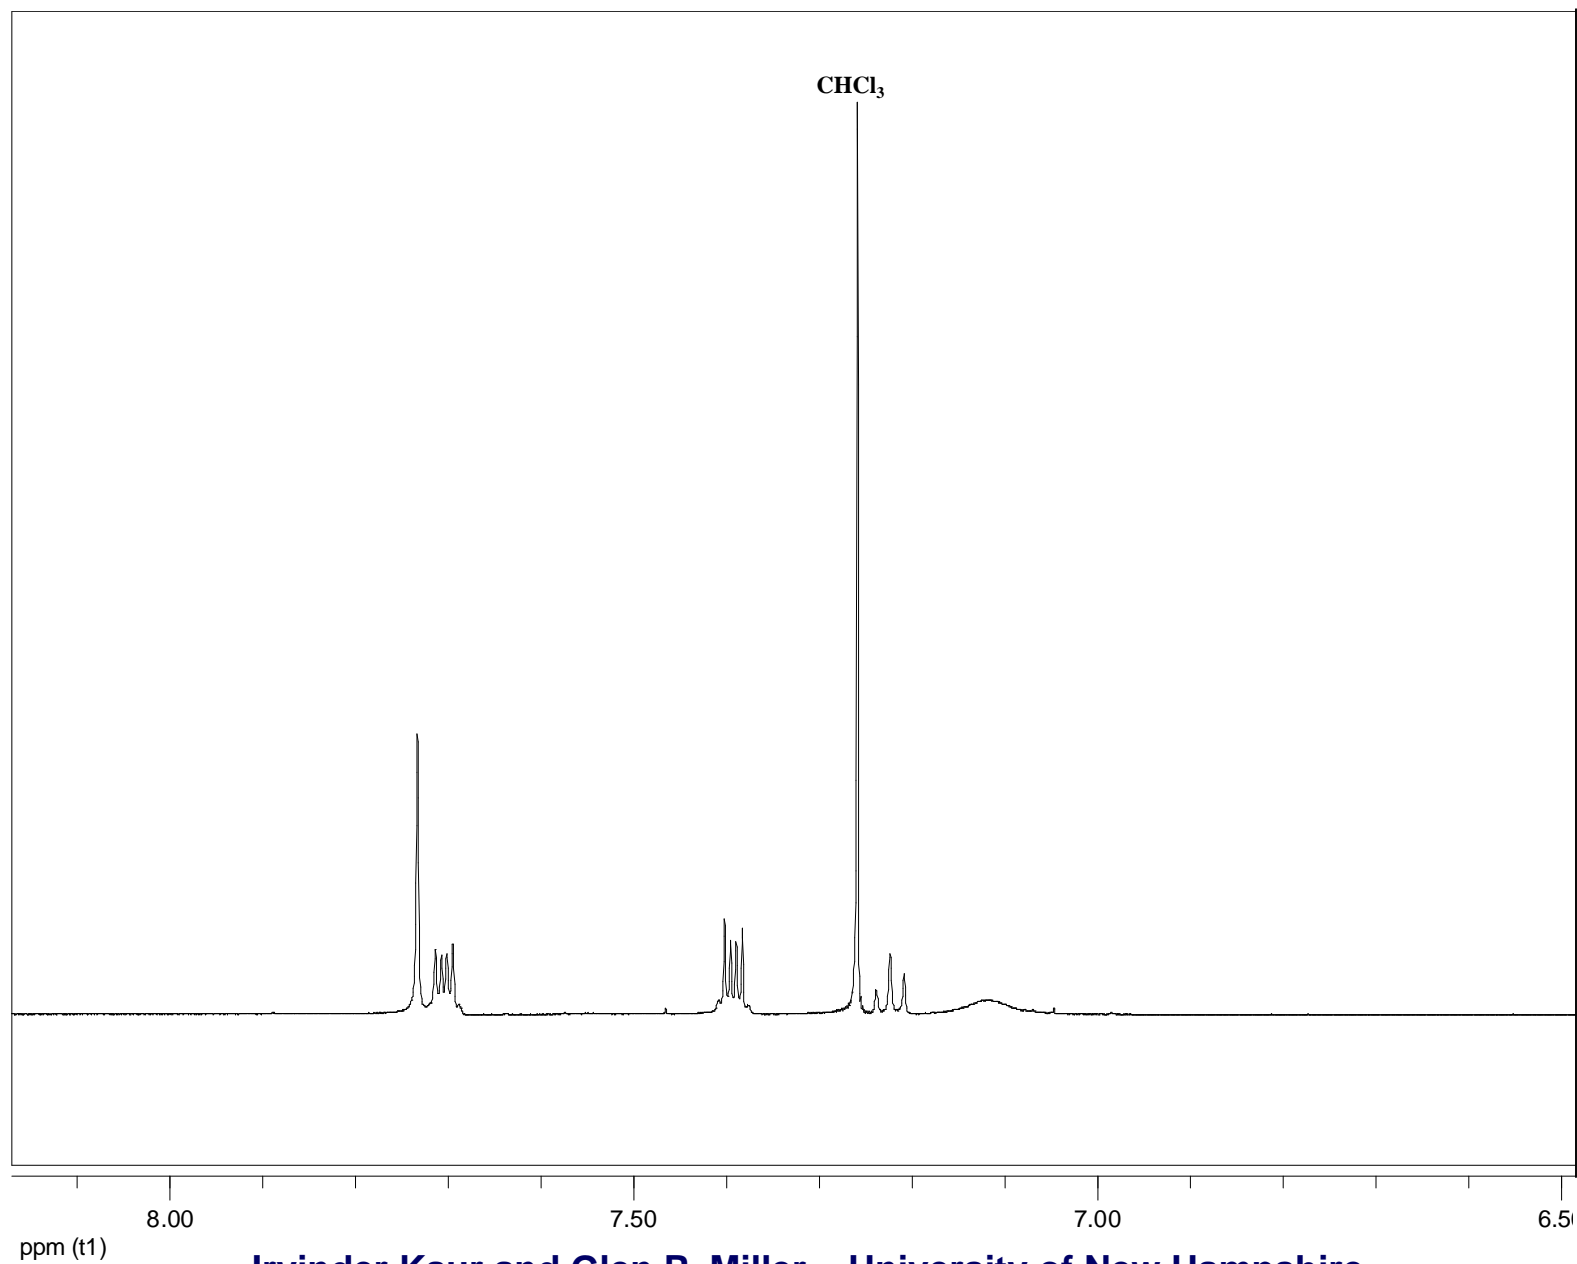

## 6,13-Bis(2',6'-dimethylphenyl)-6,13-dihydropentacene-6,13-diol

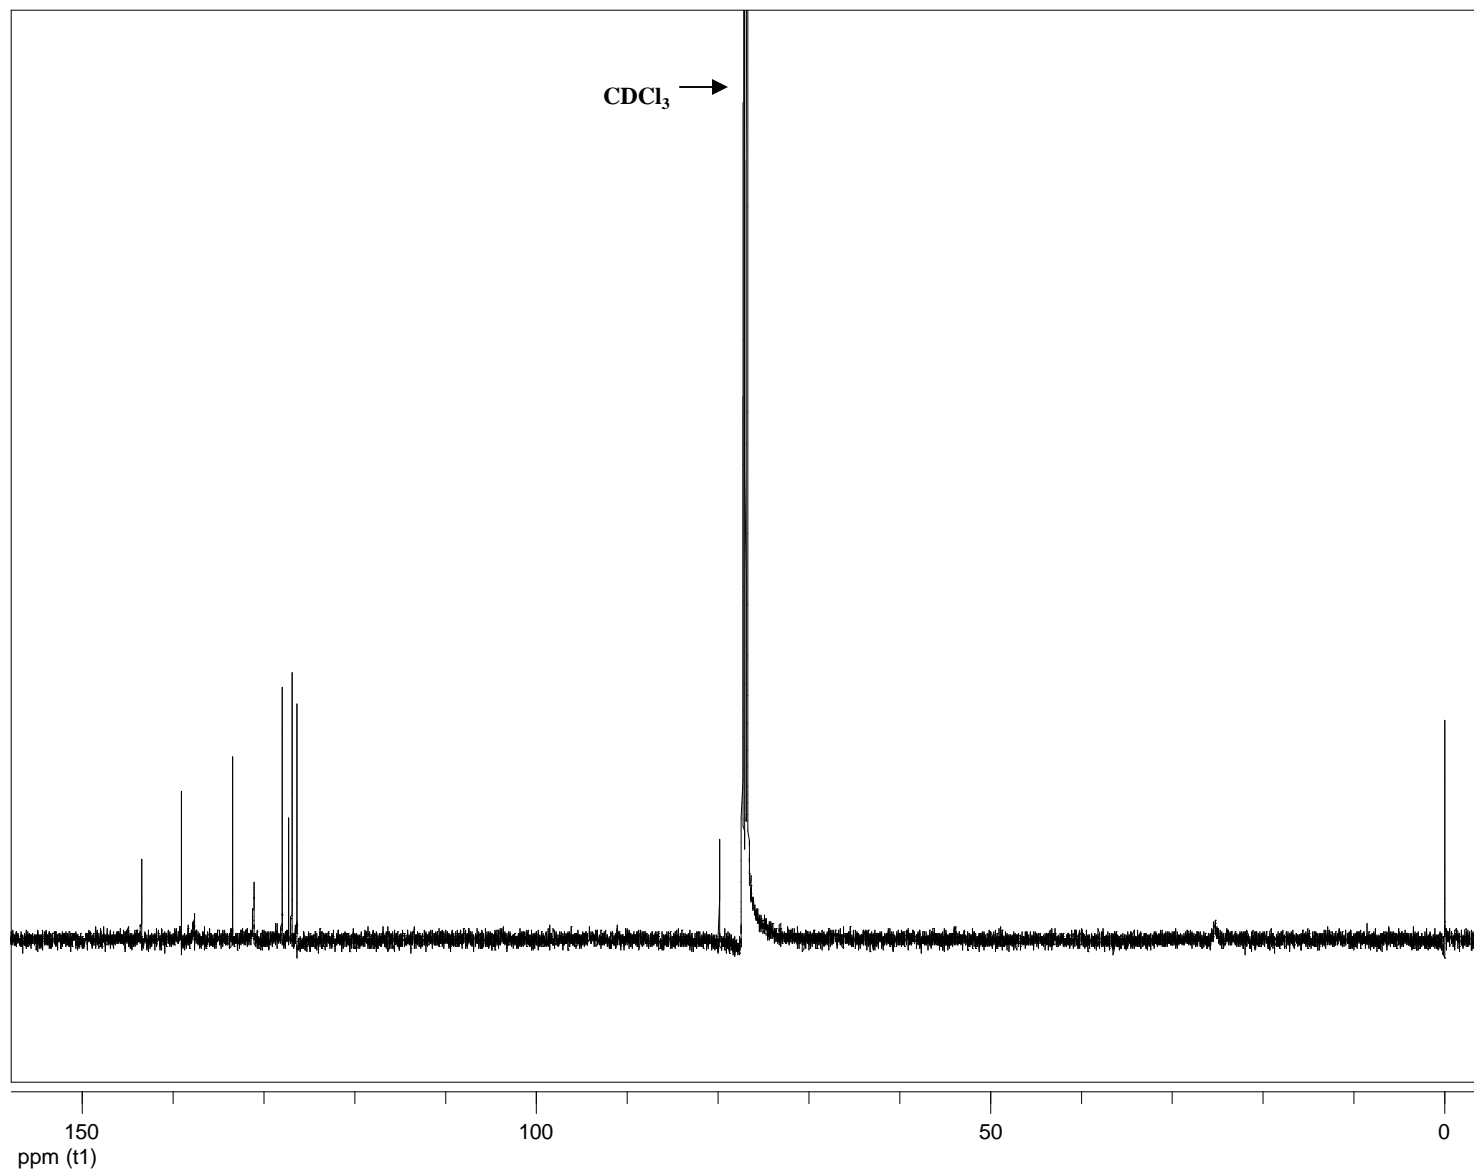

## 6,13-Bis(2',6'-dimethylphenyl)-6,13-dihydropentacene-6,13-diol

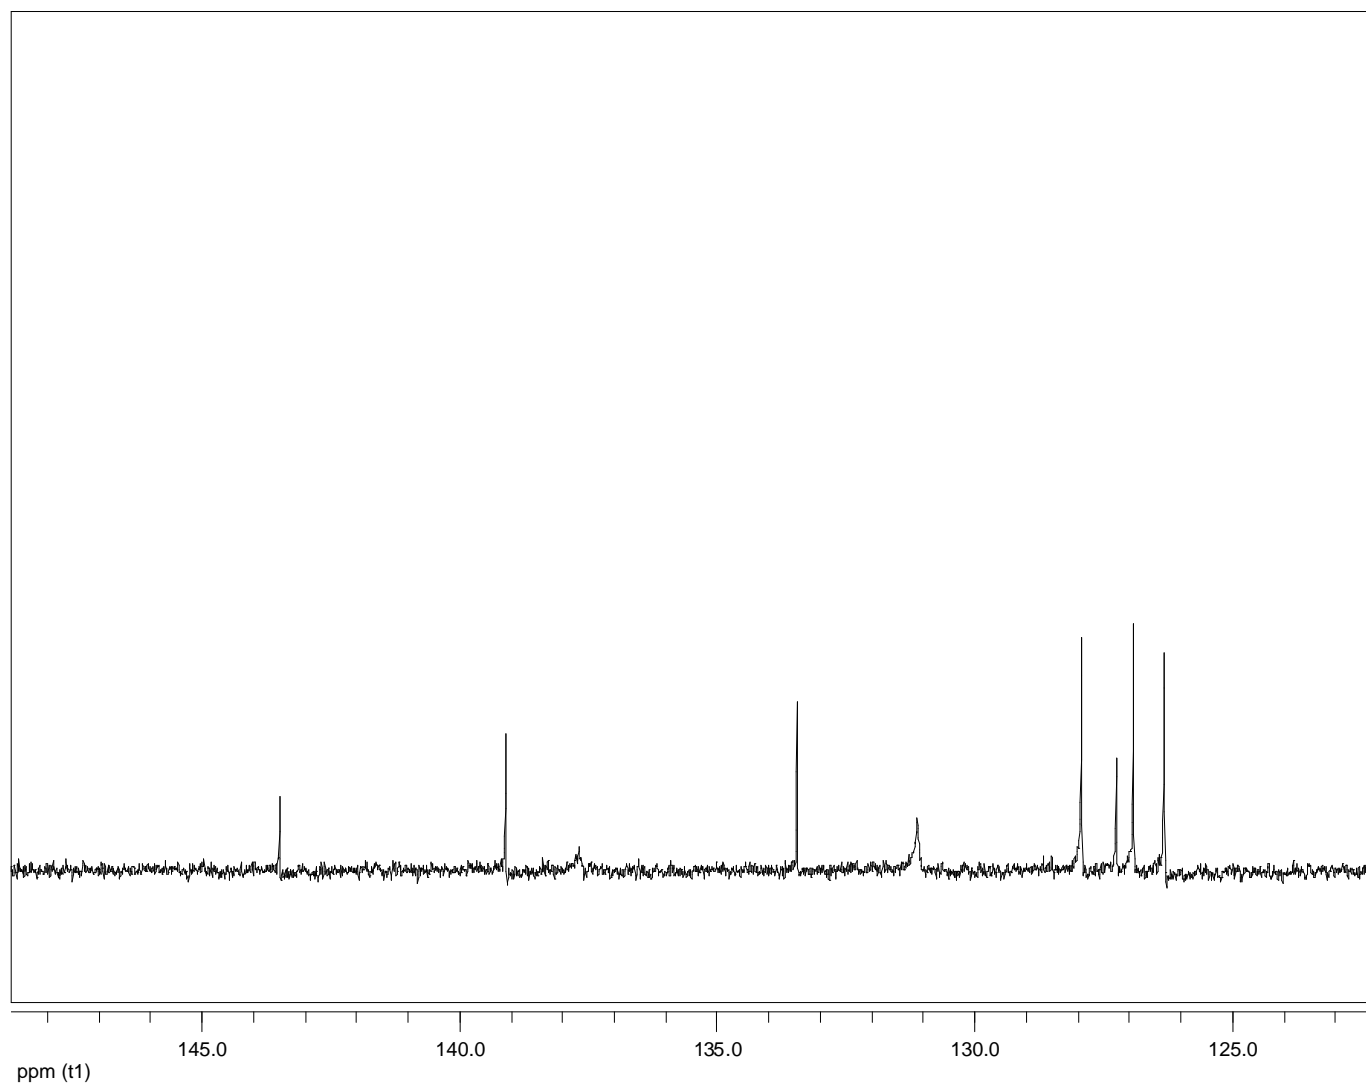

Irvinder Kaur and Glen P. Miller University of New Hampshire

## 6,13-Bis(2',6'-dimethylphenyl)-6,13-dihydropentacene-6,13-diol

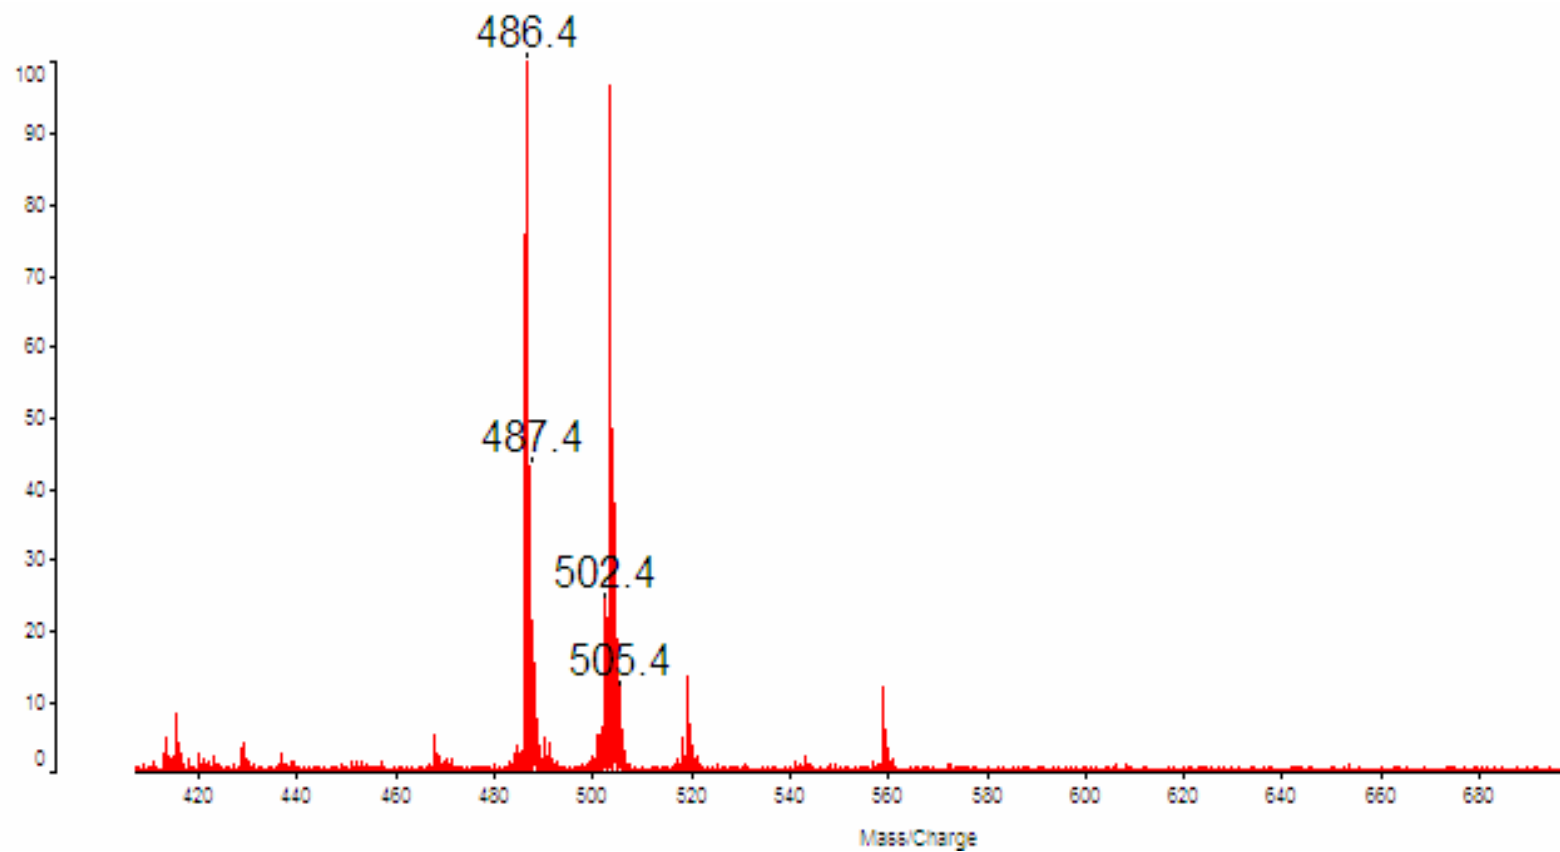

## 6,13-Bis(2',6'-dimethylphenyl)pentacene (1)

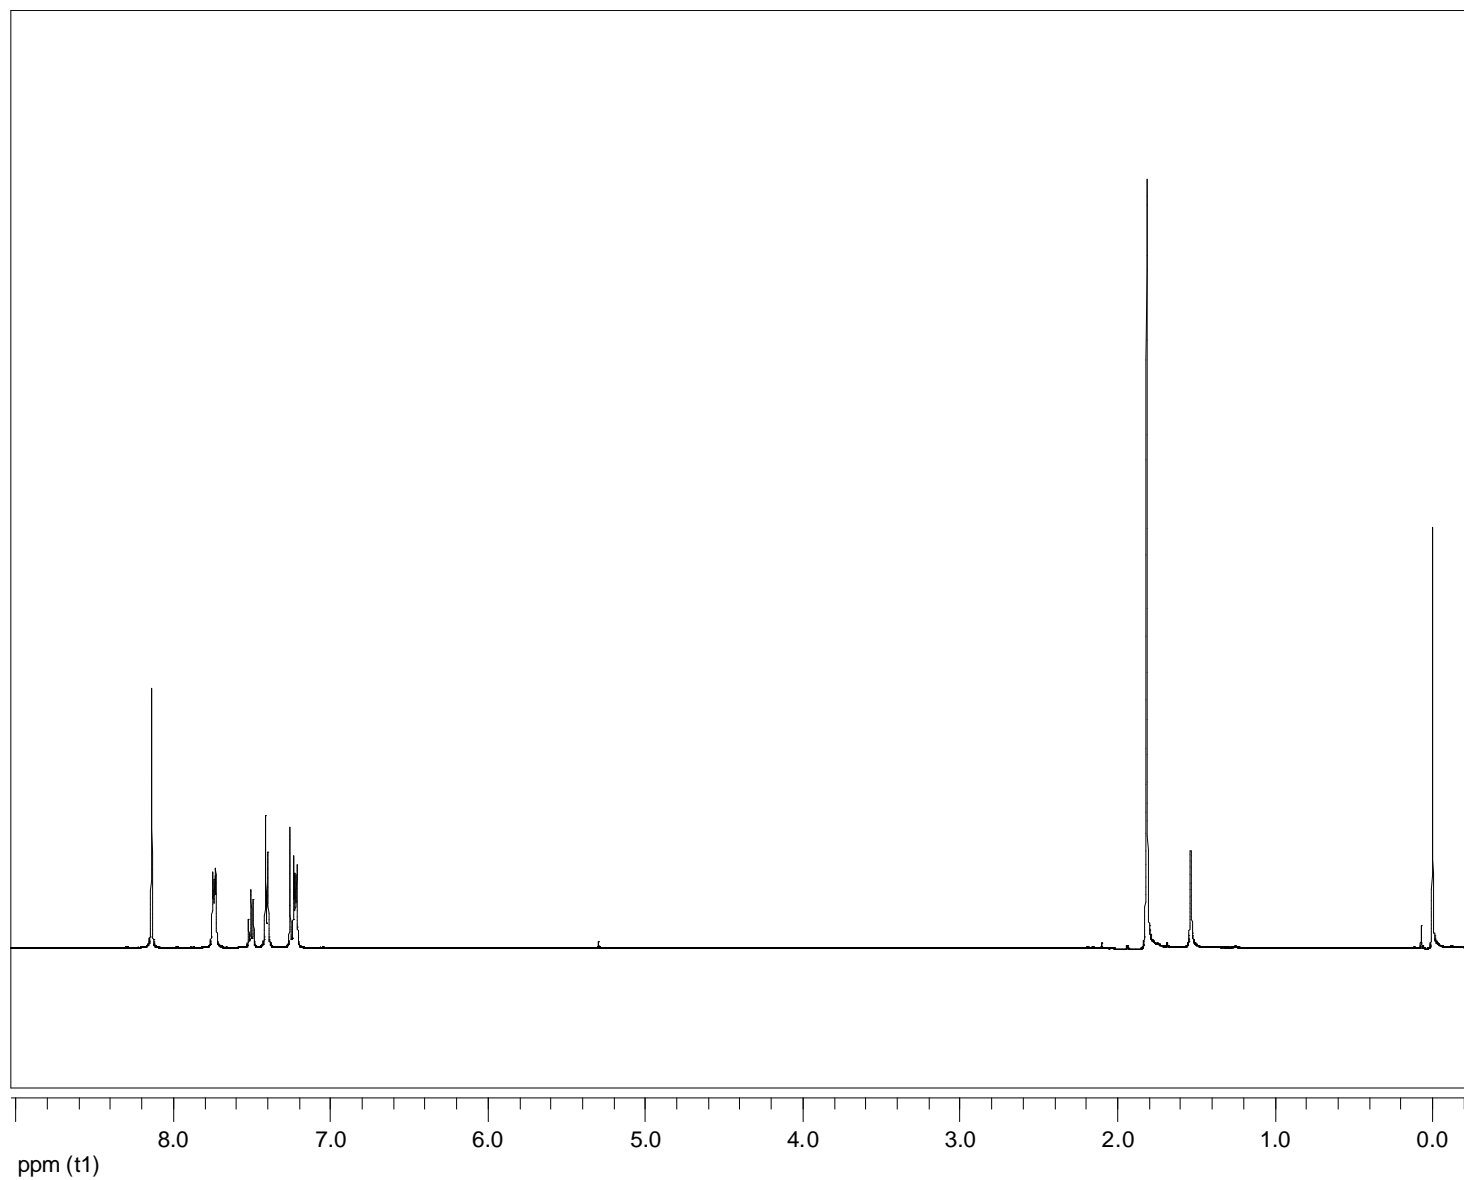

## 6,13-Bis(2',6'-dimethylphenyl)pentacene (1)

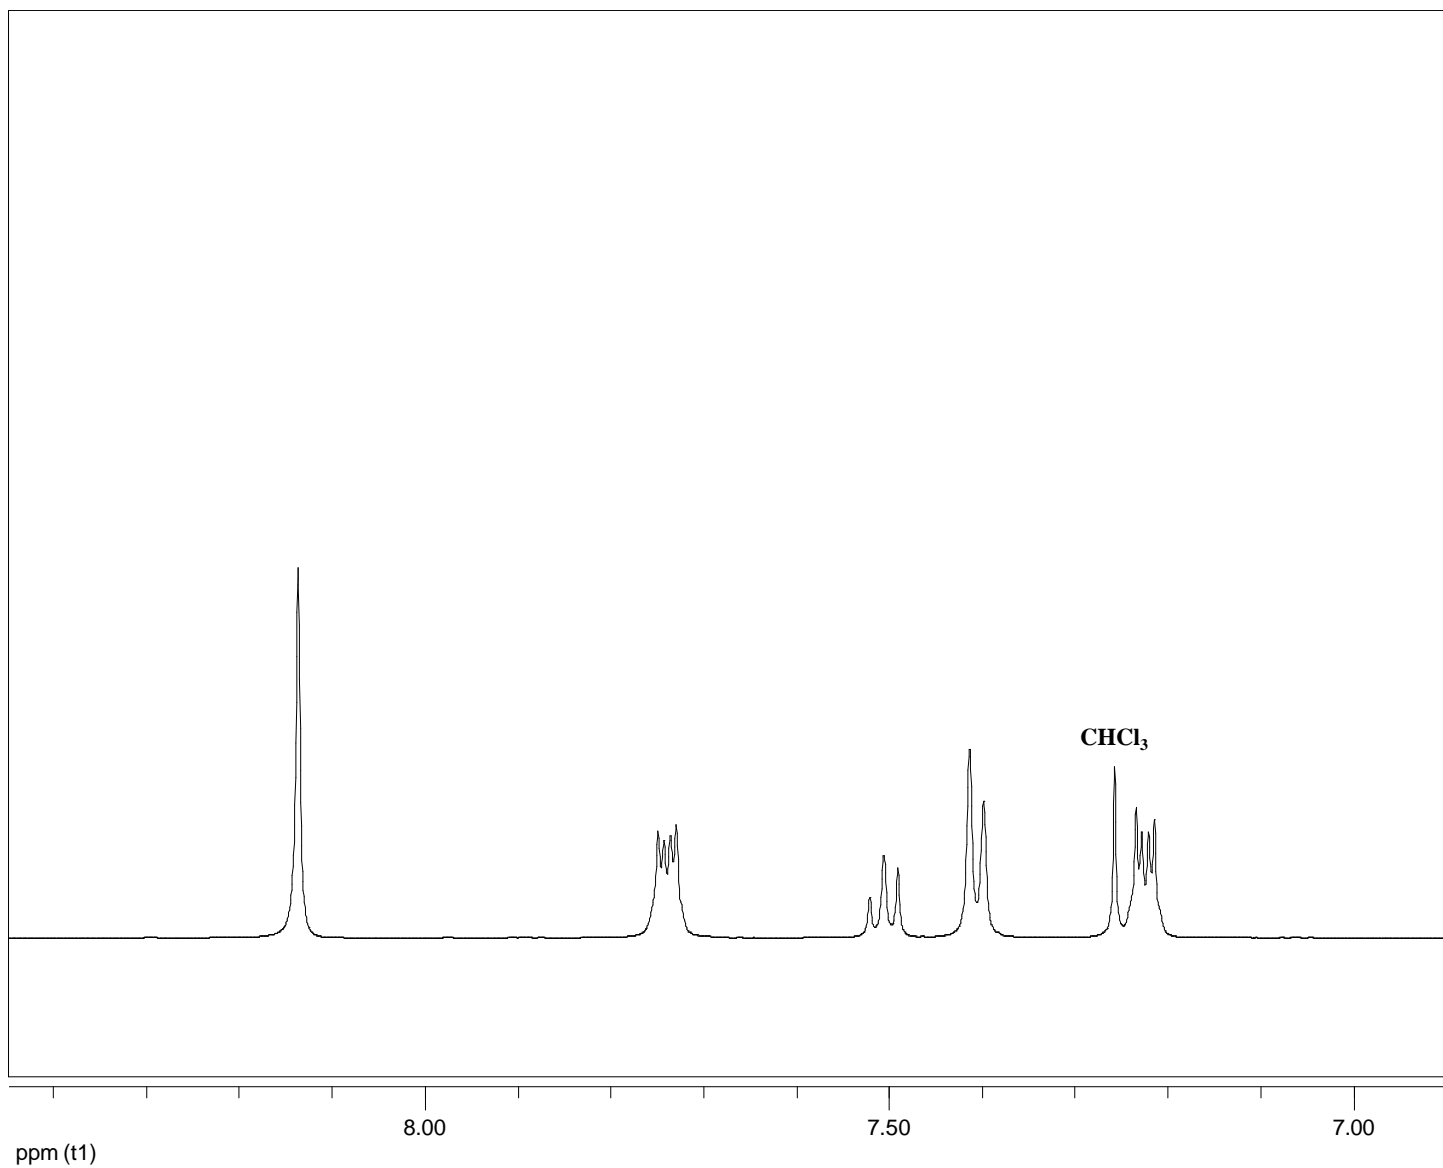



## 6,13-Bis(2',6'-dimethylphenyl)pentacene (1)

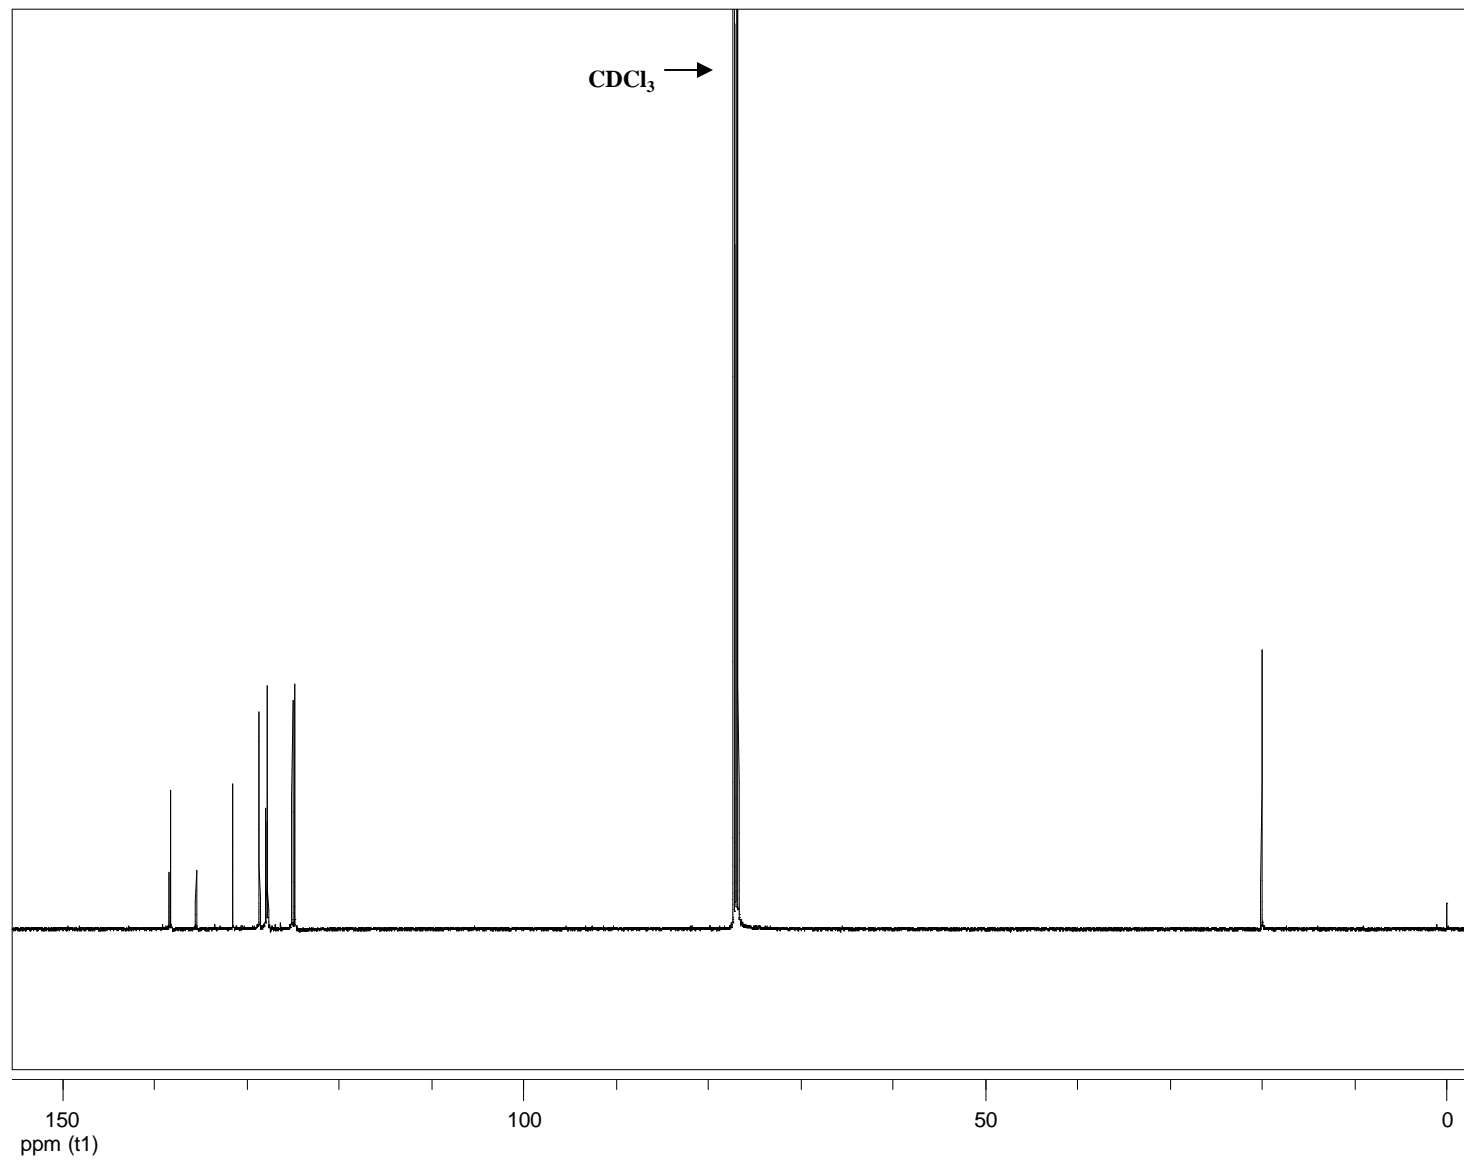

## 6,13-Bis(2',6'-dimethylphenyl)pentacene (1)

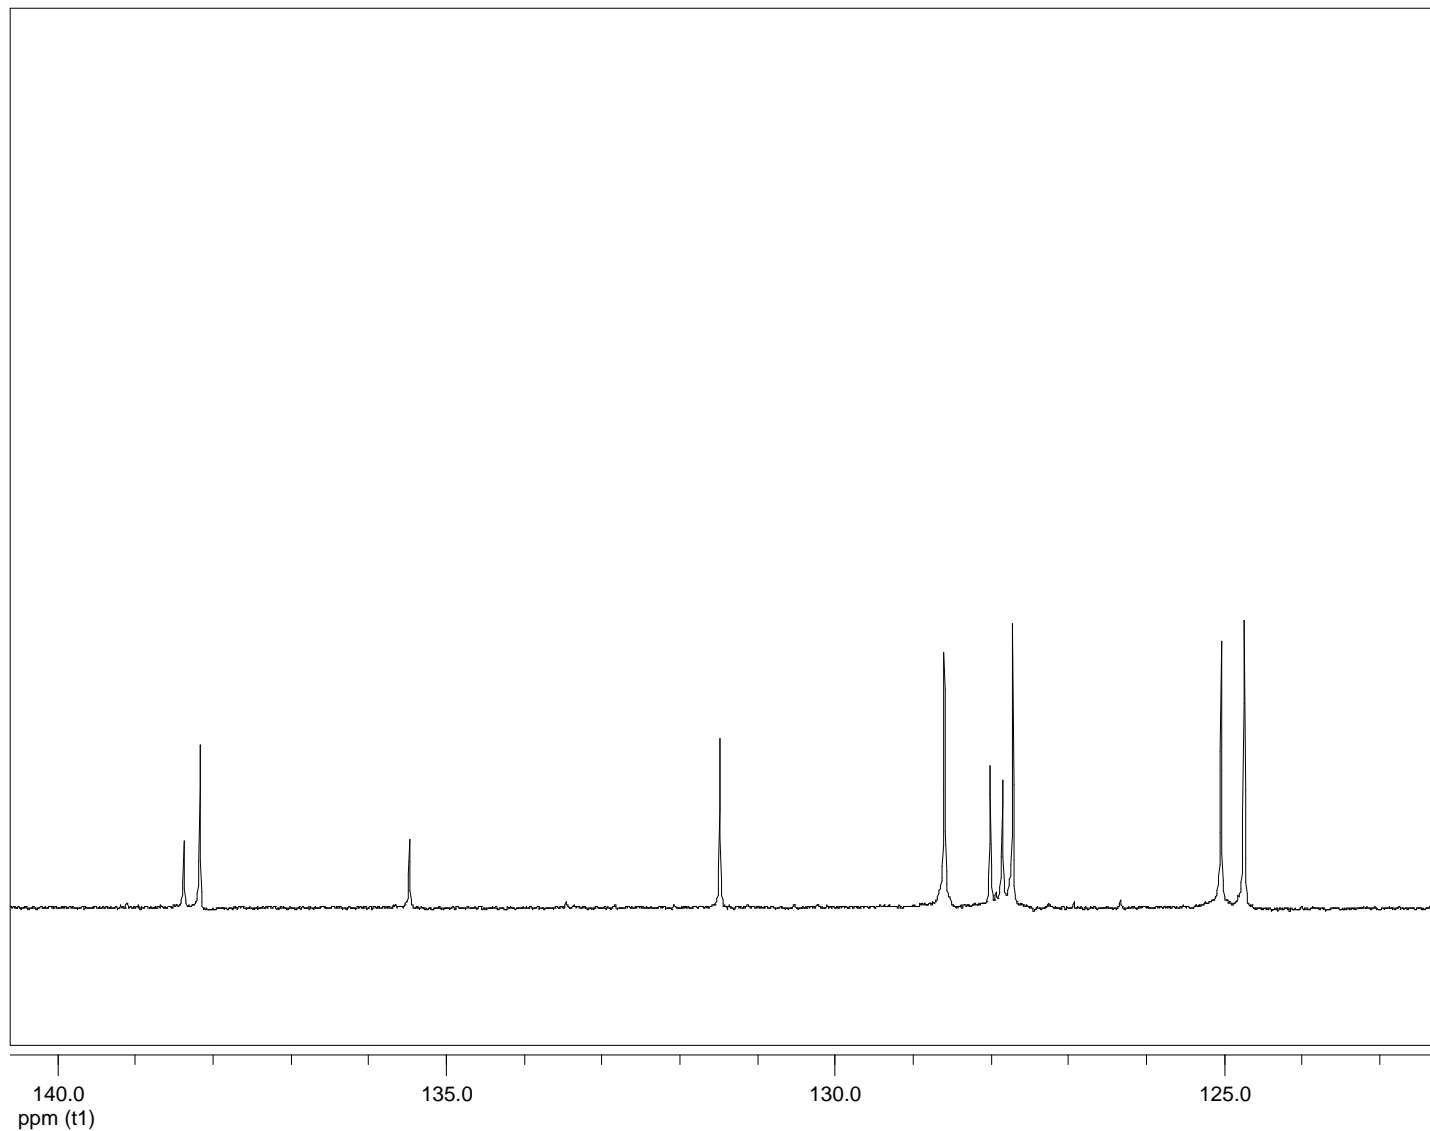

Irvinder Kaur and Glen P. Miller University of New Hampshire

## 6,13-Bis(2',6'-dimethylphenyl)pentacene (1)

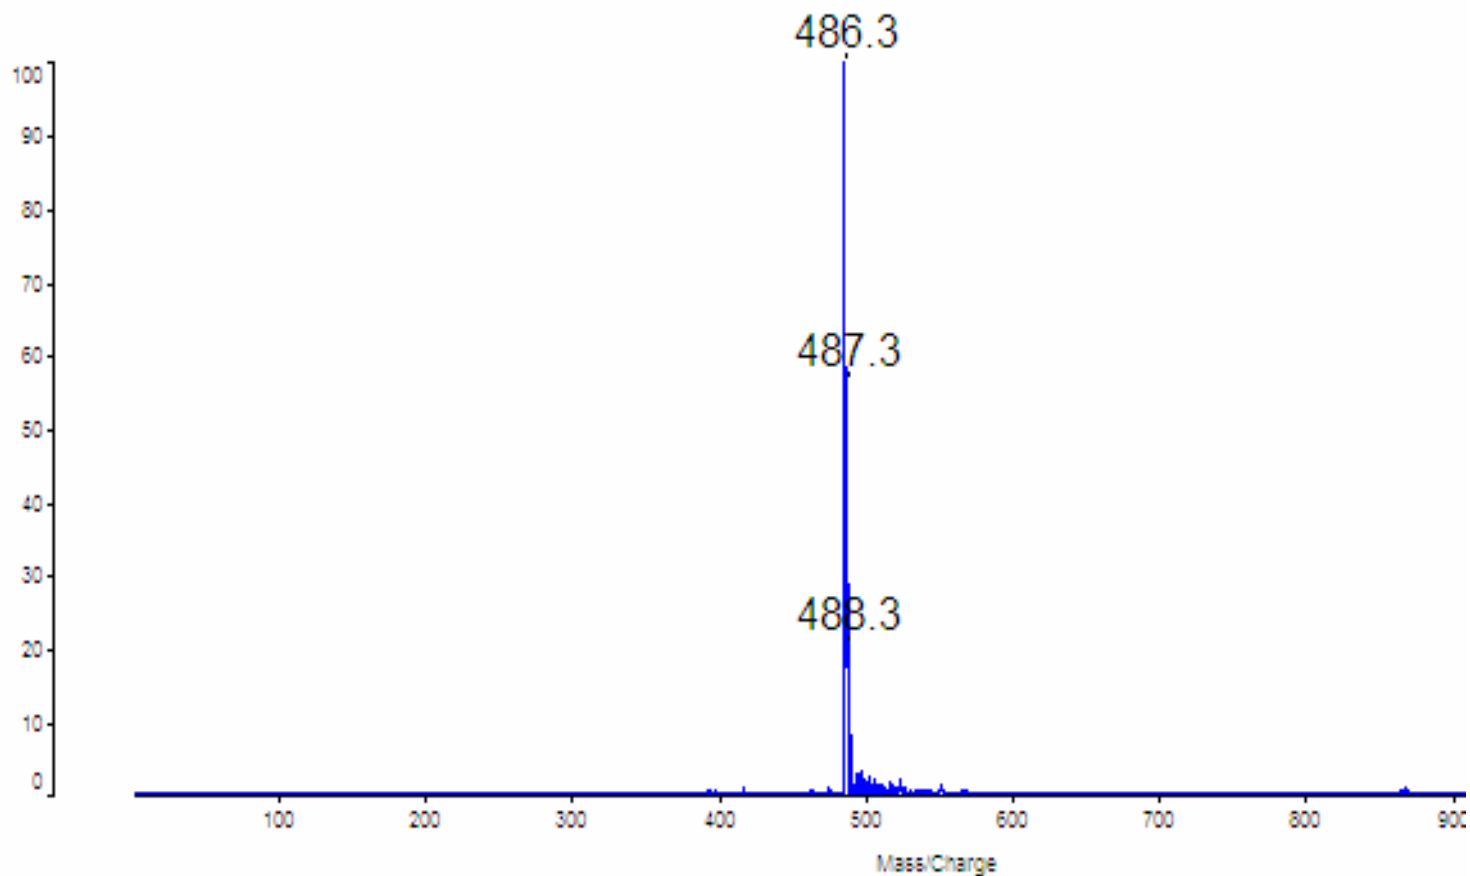

## 6,13-Bis(2',6'-diethylphenyl)-6,13-dihydropentacene-6,13-diol

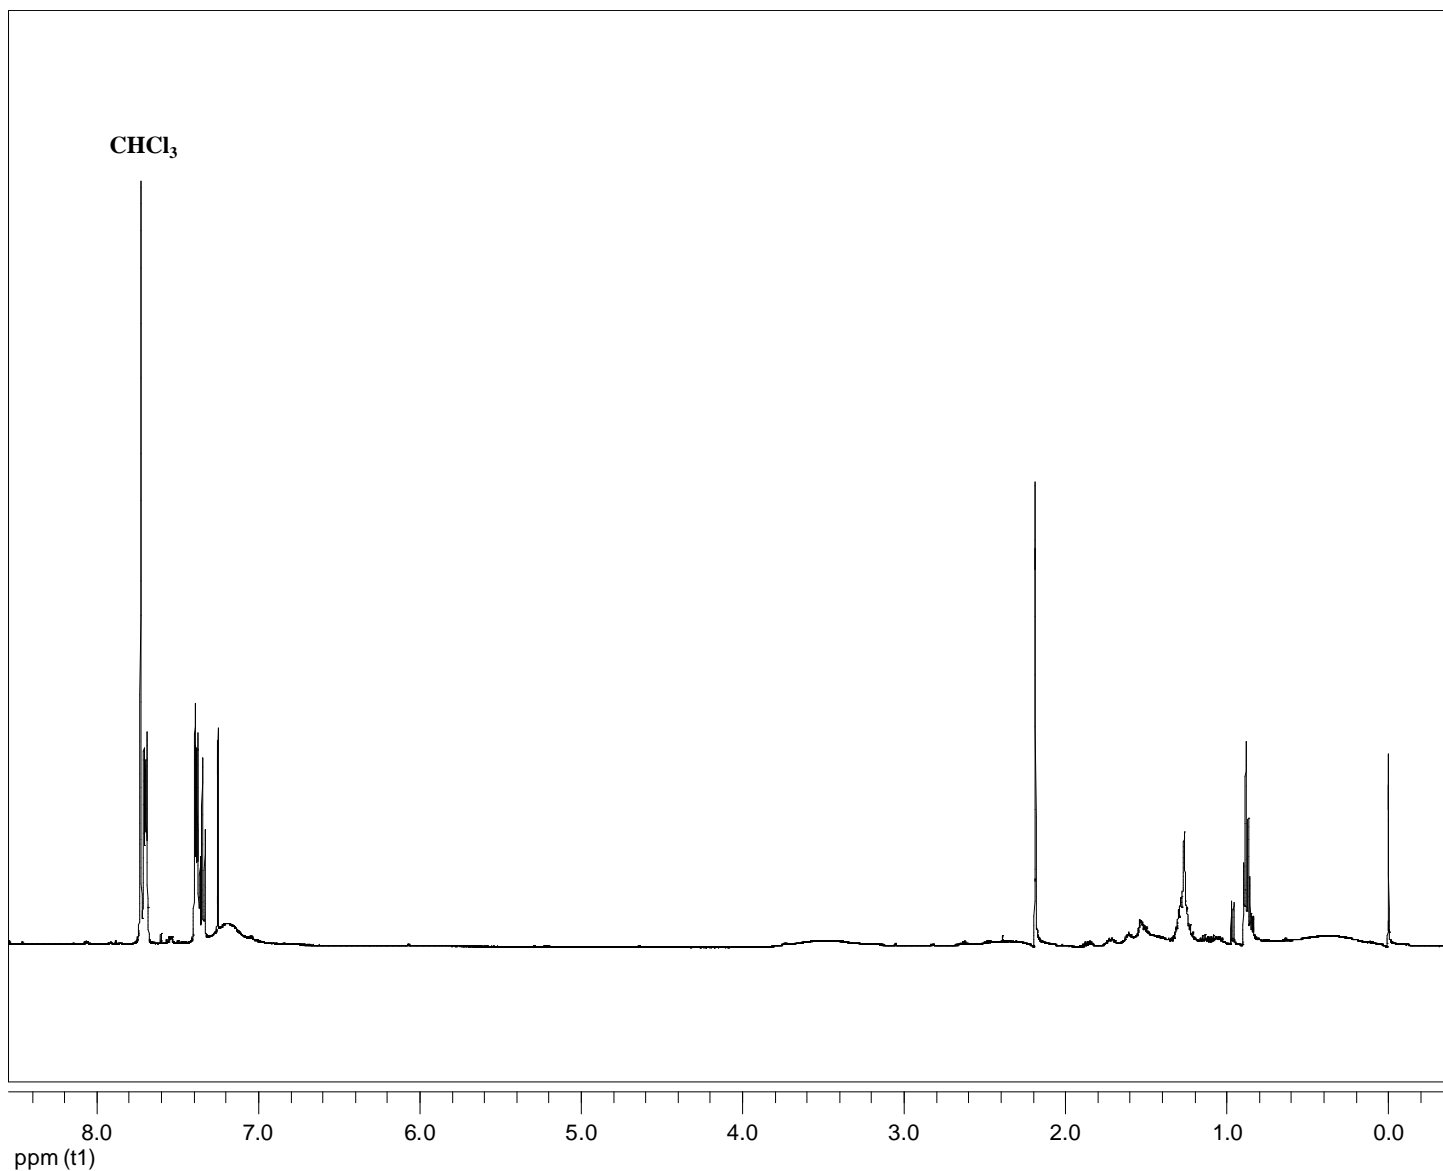

## 6,13-Bis(2',6'-diethylphenyl)-6,13-dihydropentacene-6,13-diol

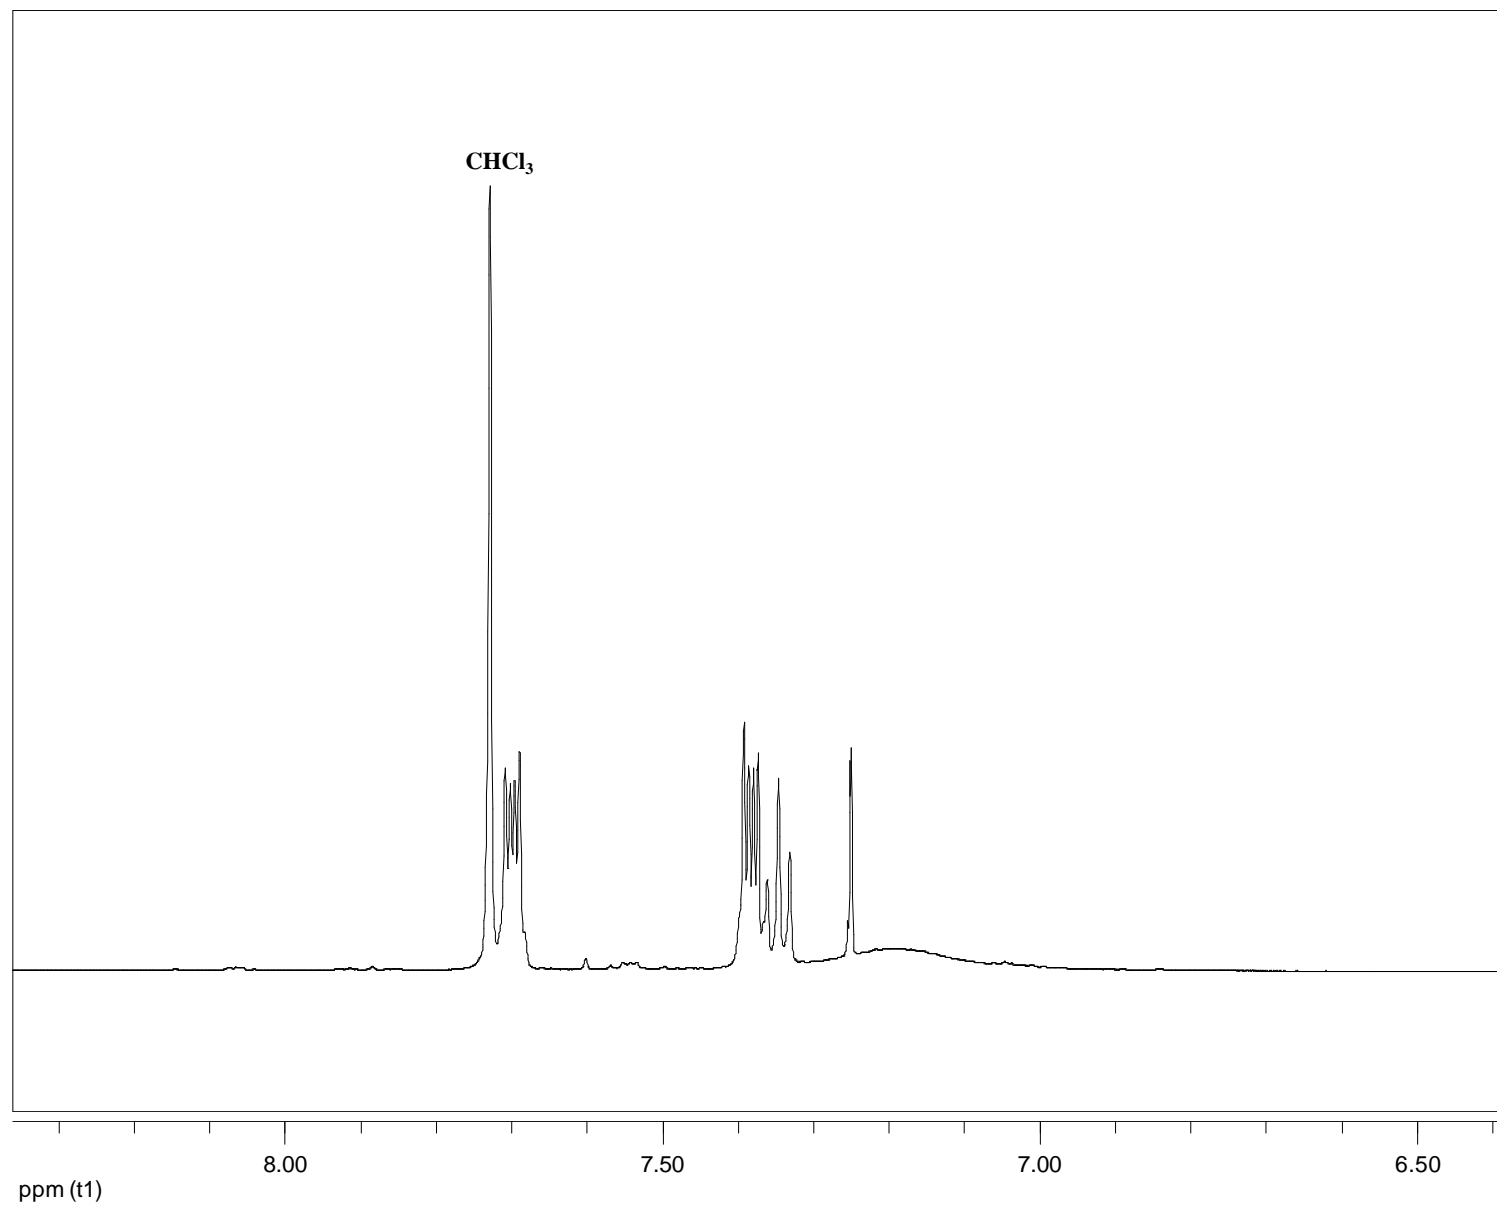

## 6,13-Bis(2',6'-diethylphenyl)-6,13-dihydropentacene-6,13-diol

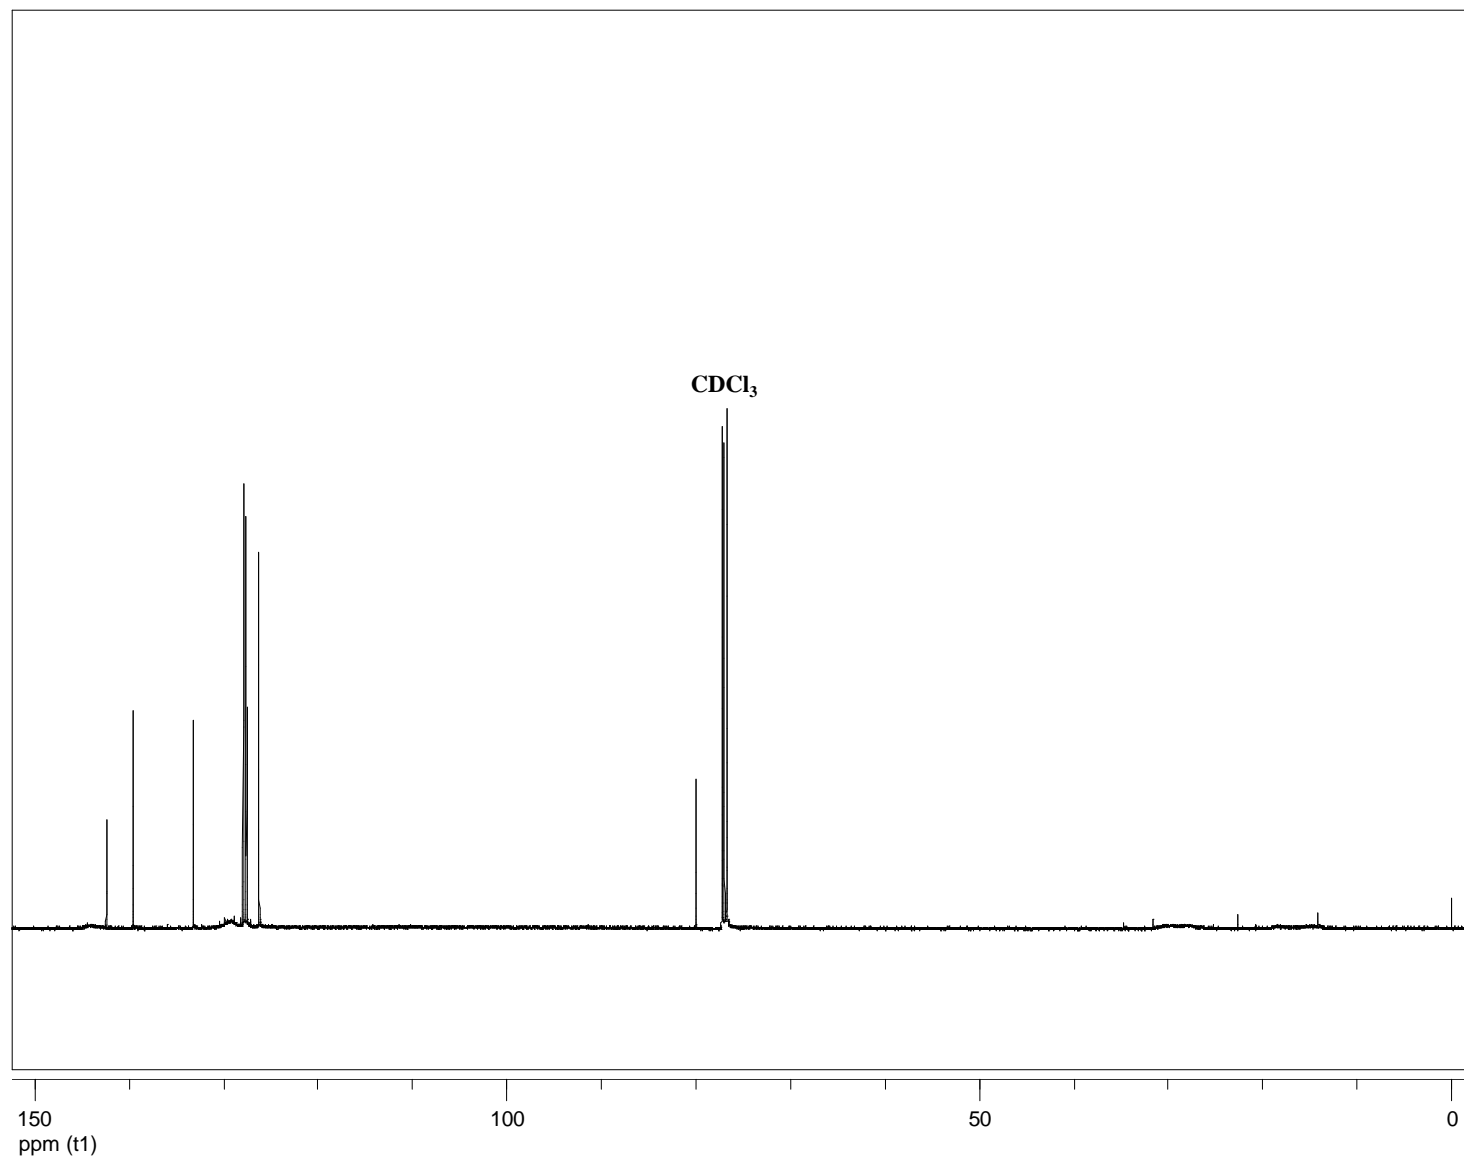

## 6,13-Bis(2',6'-diethylphenyl)-6,13-dihydropentacene-6,13-diol

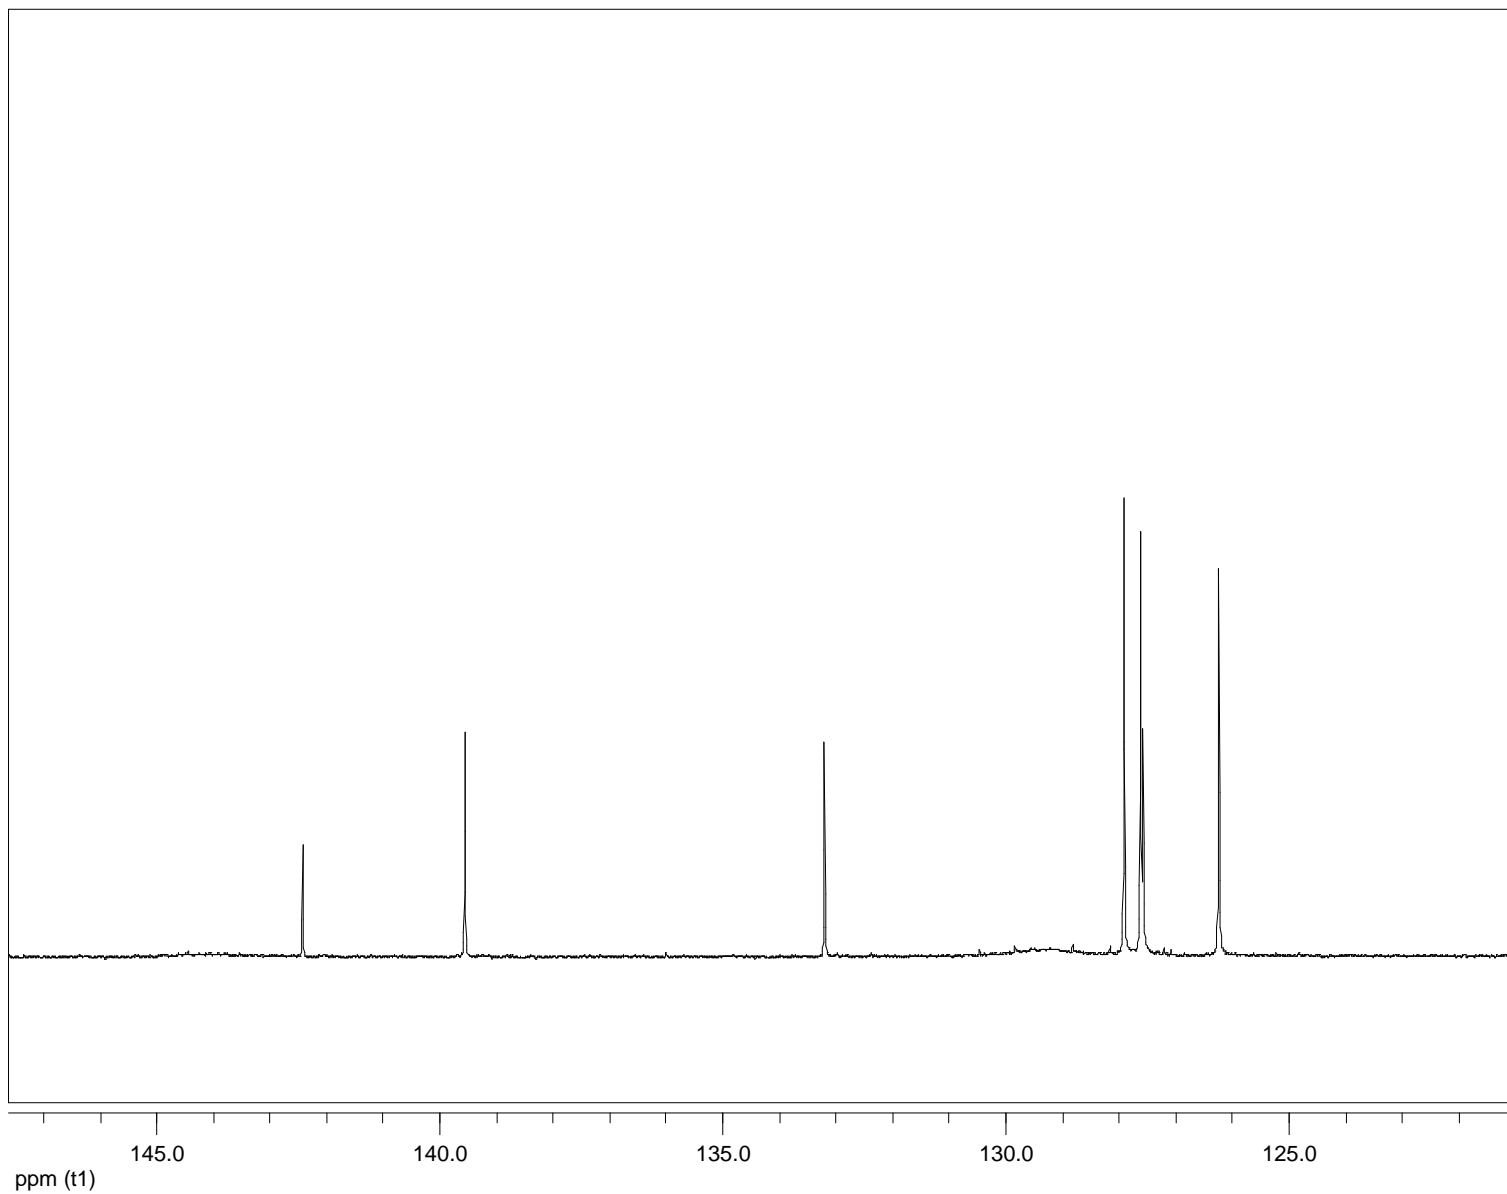

Irvinder Kaur and Glen P. Miller University of New Hampshire

## 6,13-Bis(2',6'-diethylphenyl)-6,13-dihydropentacene-6,13-diol

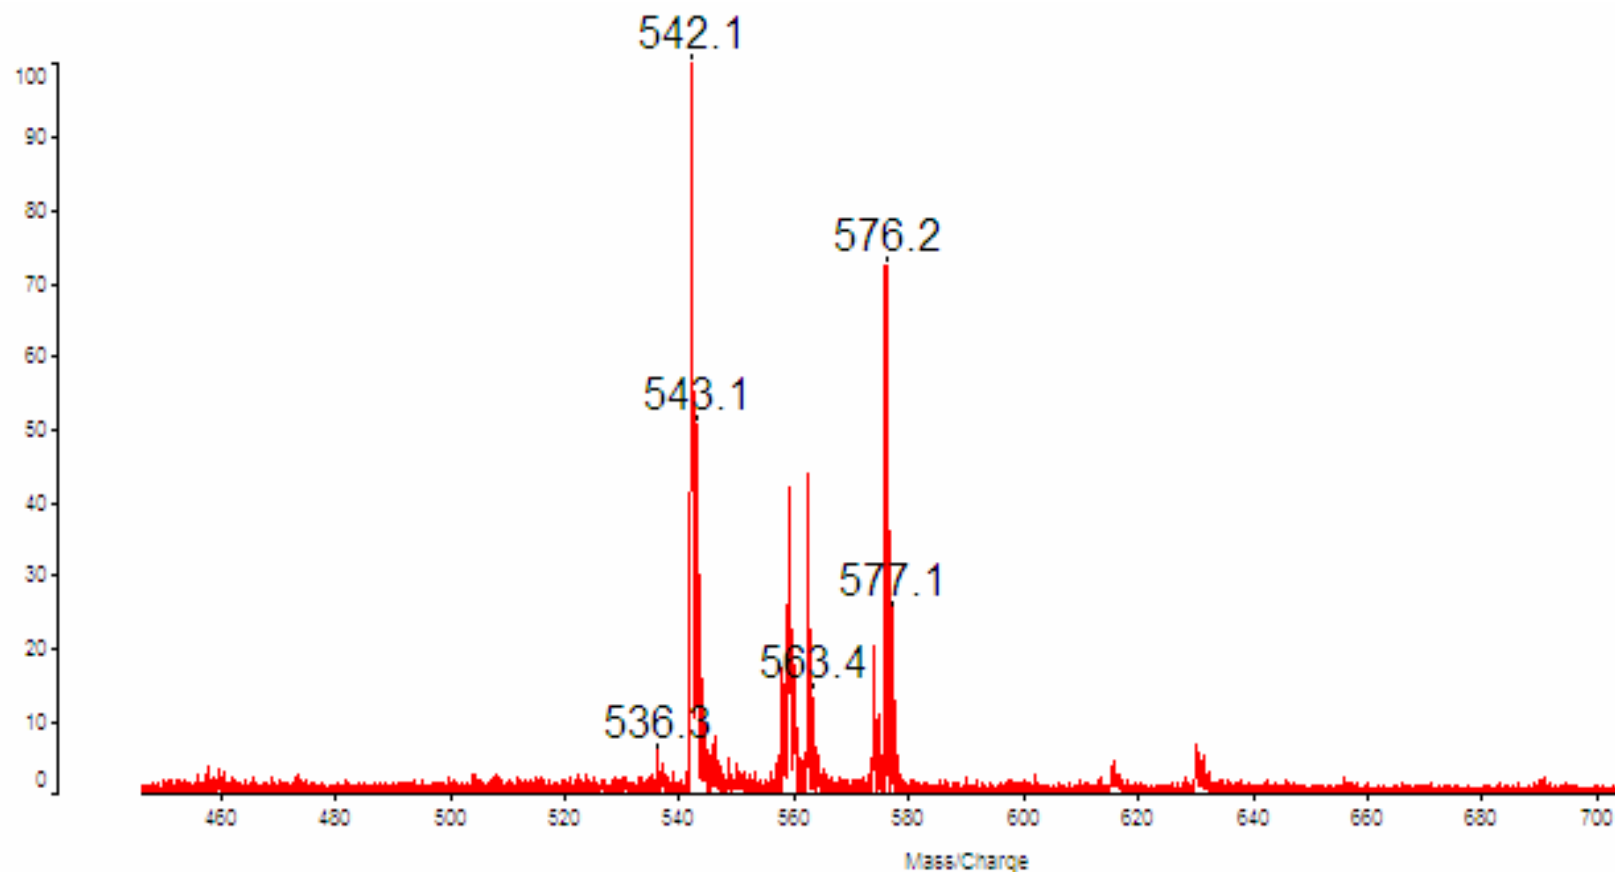



## 6,13-Bis(2',6'-diethylphenyl)pentacene (2)

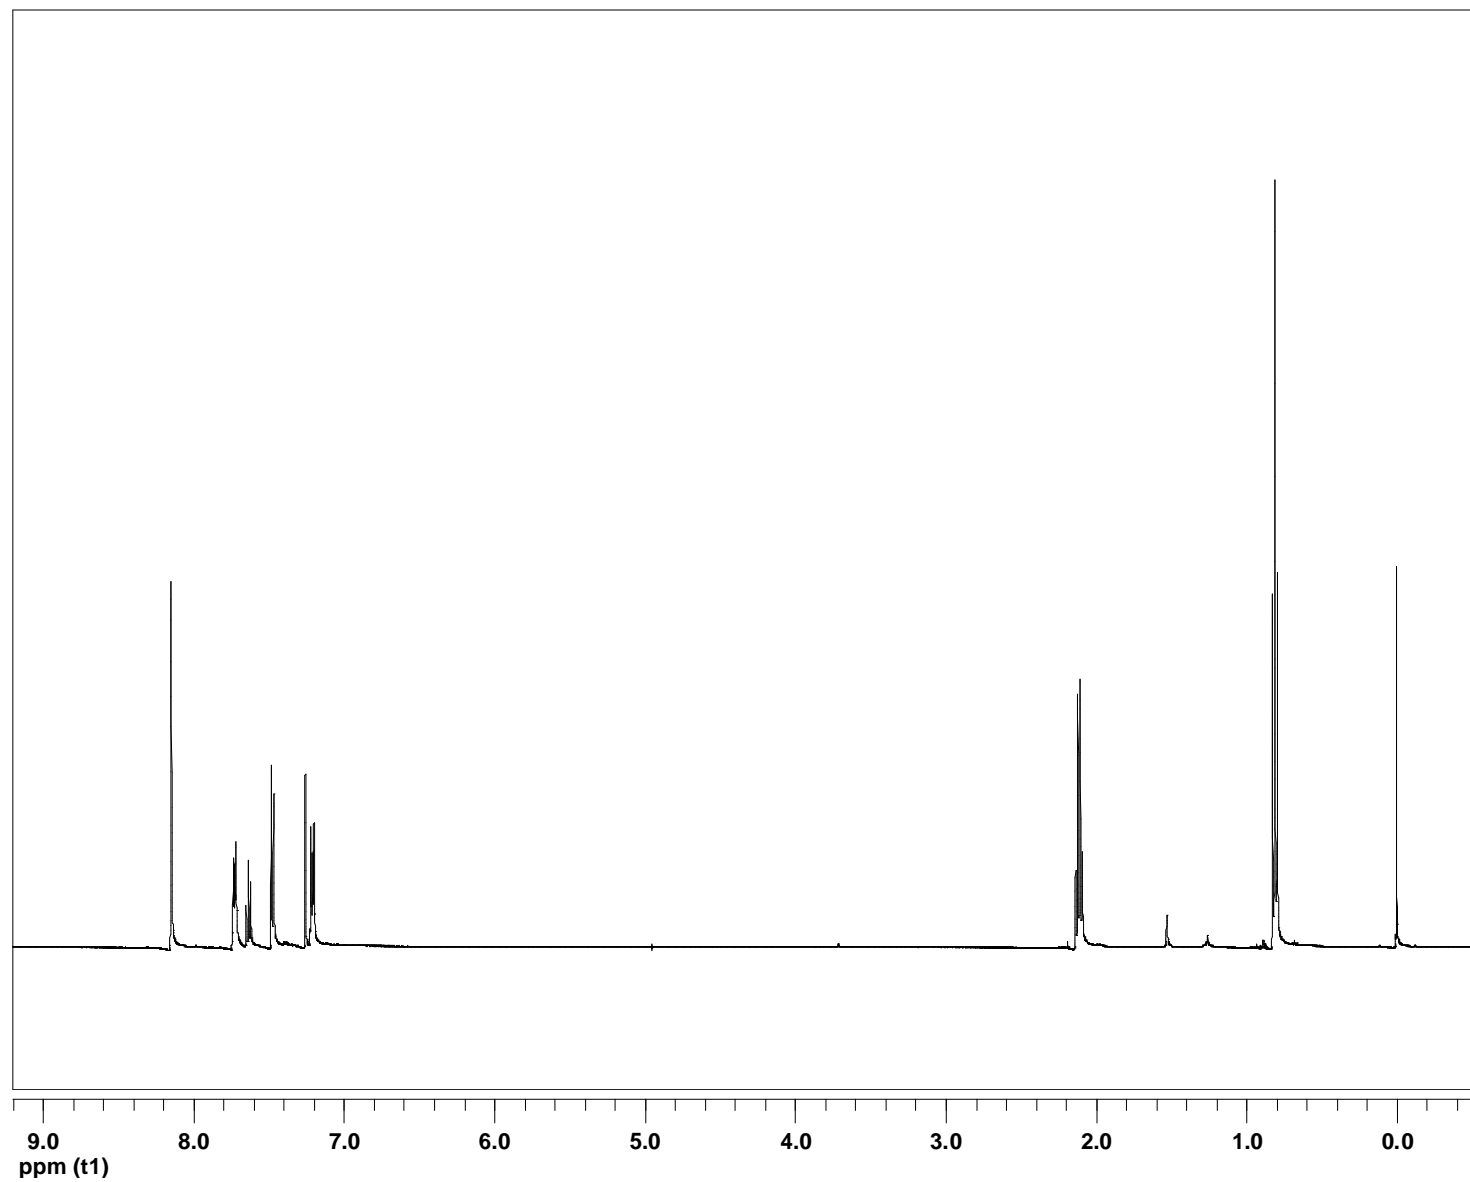

Irvinder Kaur and Glen P. Miller University of New Hampshire

## 6,13-Bis(2',6'-diethylphenyl)pentacene (2)

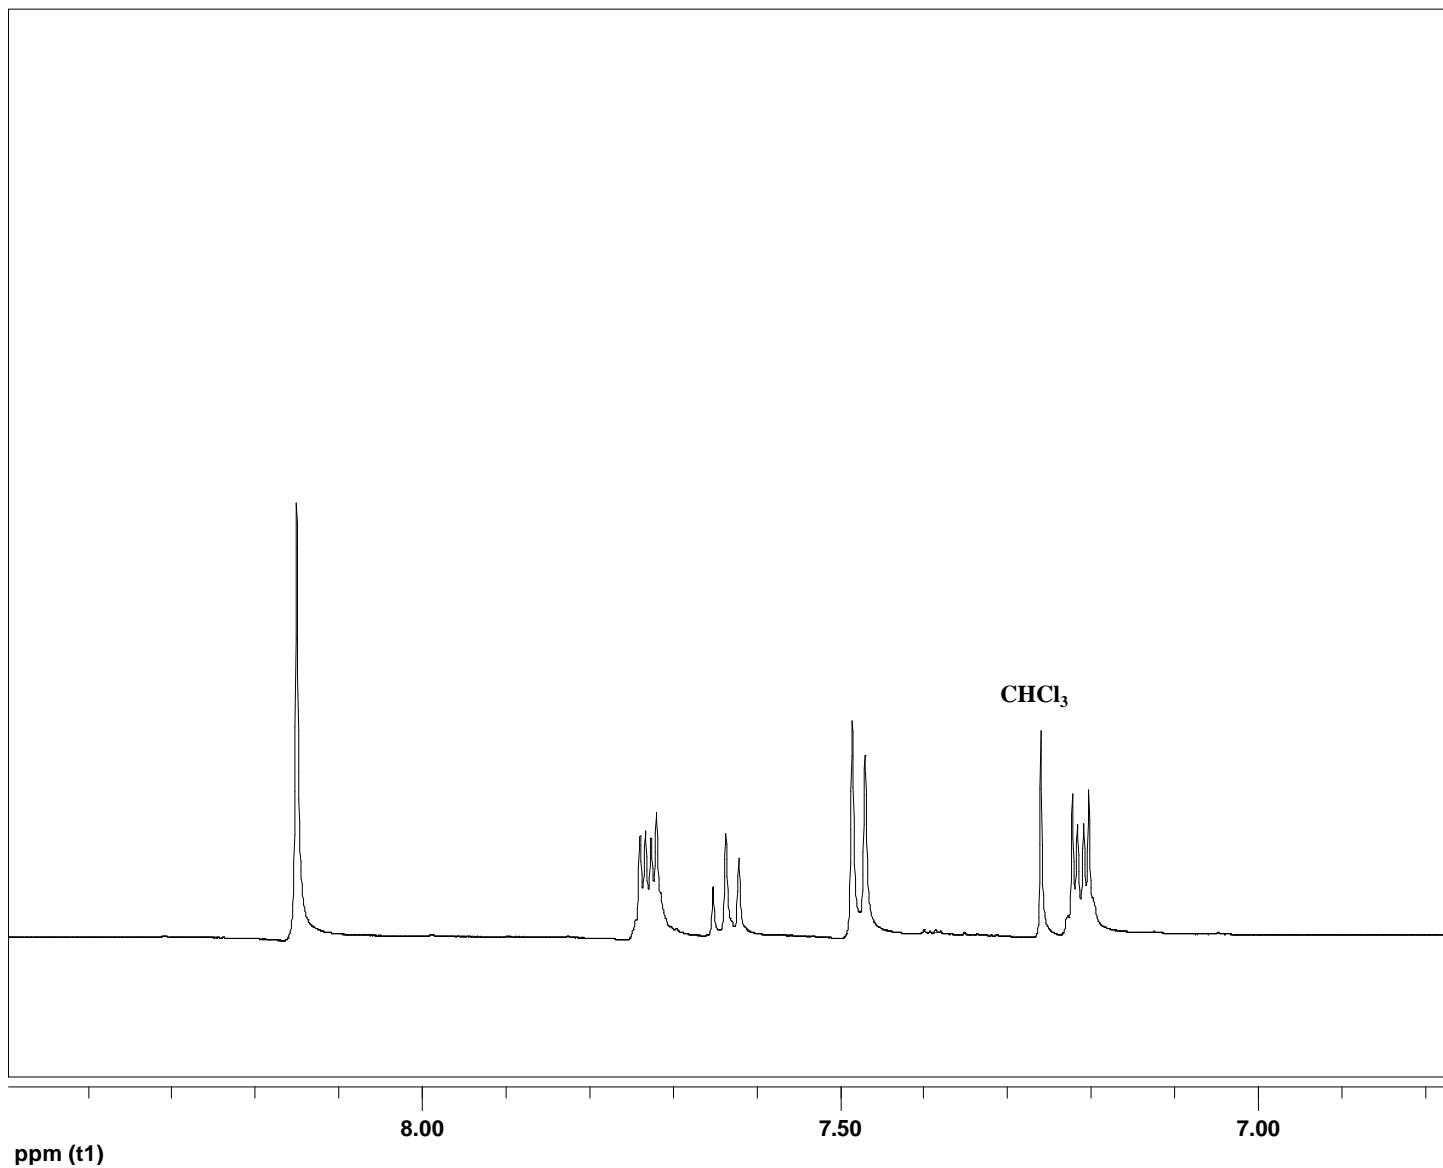

## 6,13-Bis(2',6'-diethylphenyl)pentacene (2)

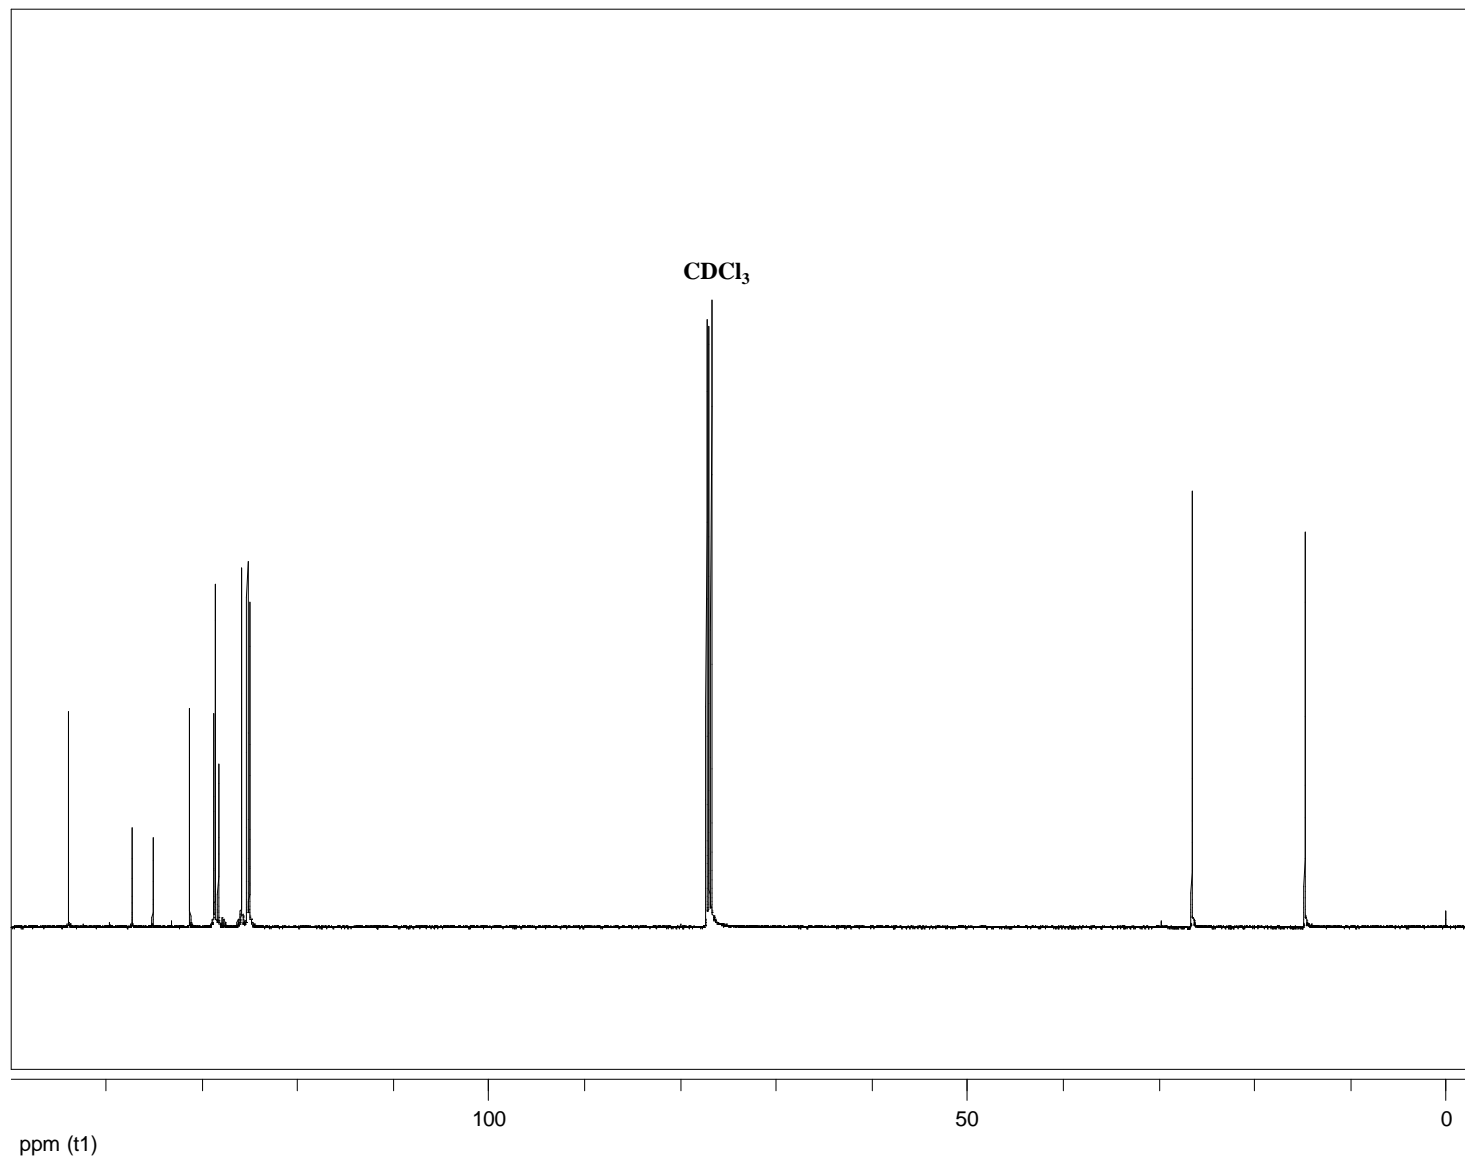

## 6,13-Bis(2',6'-diethylphenyl)pentacene (2)

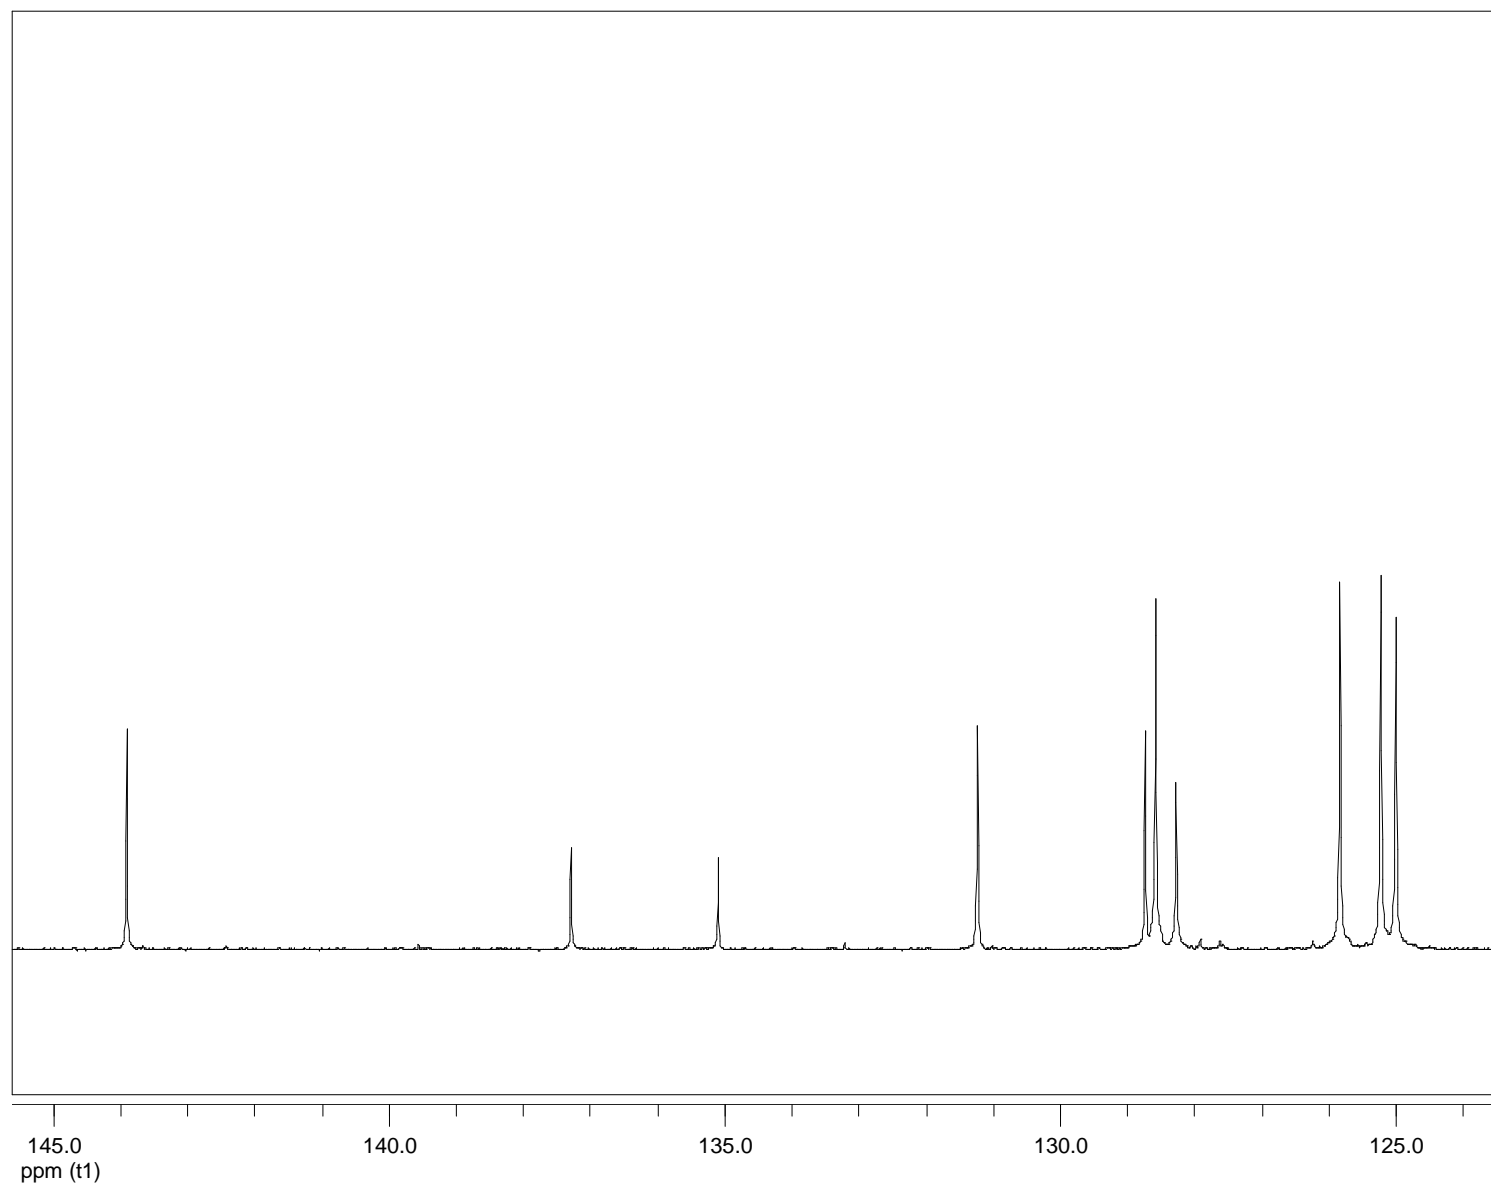

Irvinder Kaur and Glen P. Miller University of New Hampshire

## 6,13-Bis(2',6'-diethylphenyl)pentacene (2)

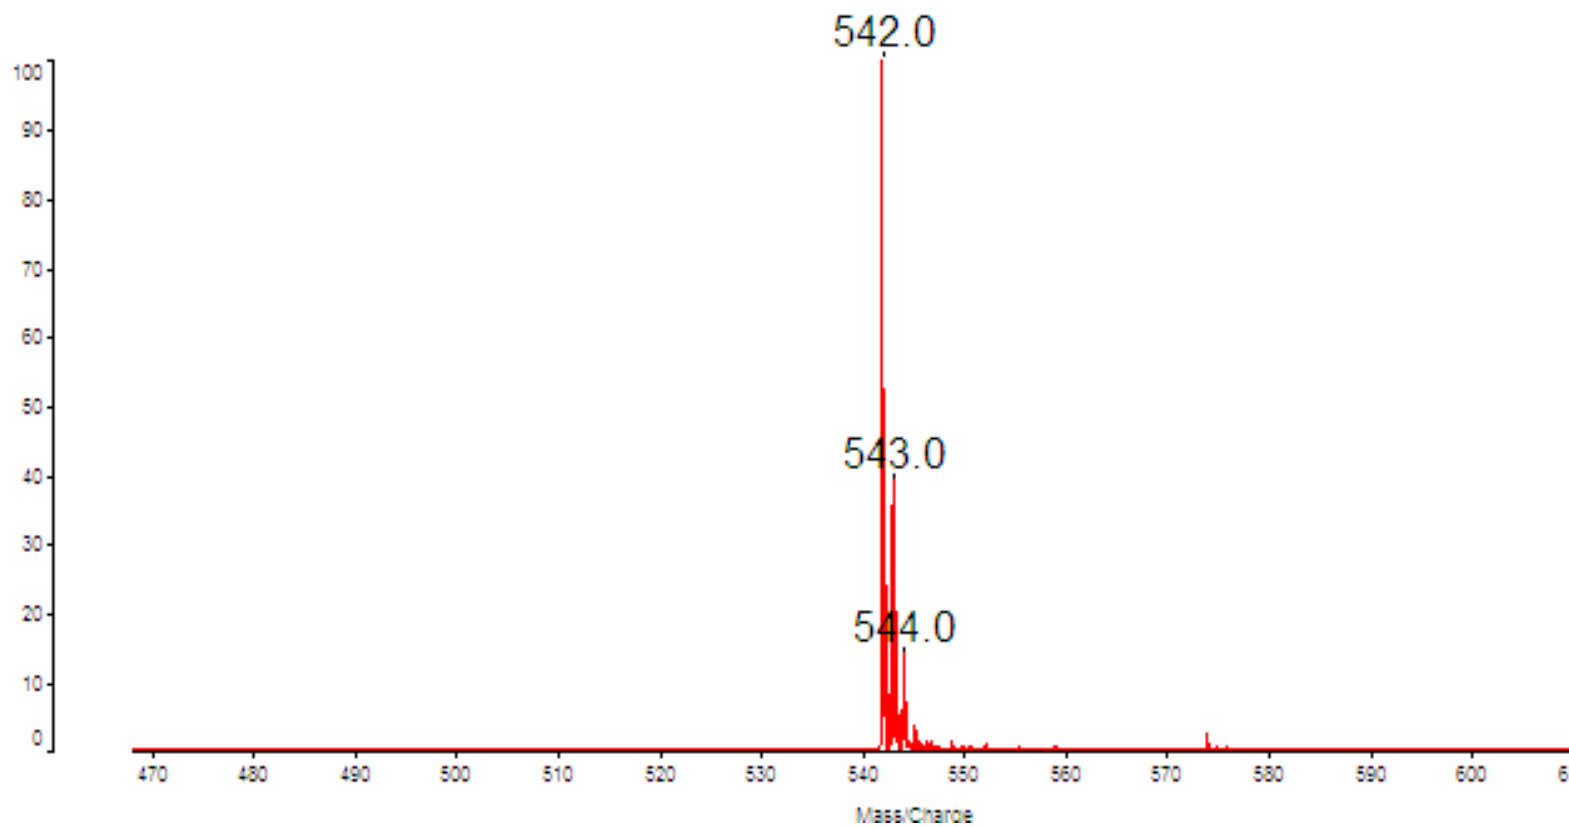

## [60]Fullerene-6,13-bis(2',6'-dimethylphenyl)pentacene monoadduct (3)

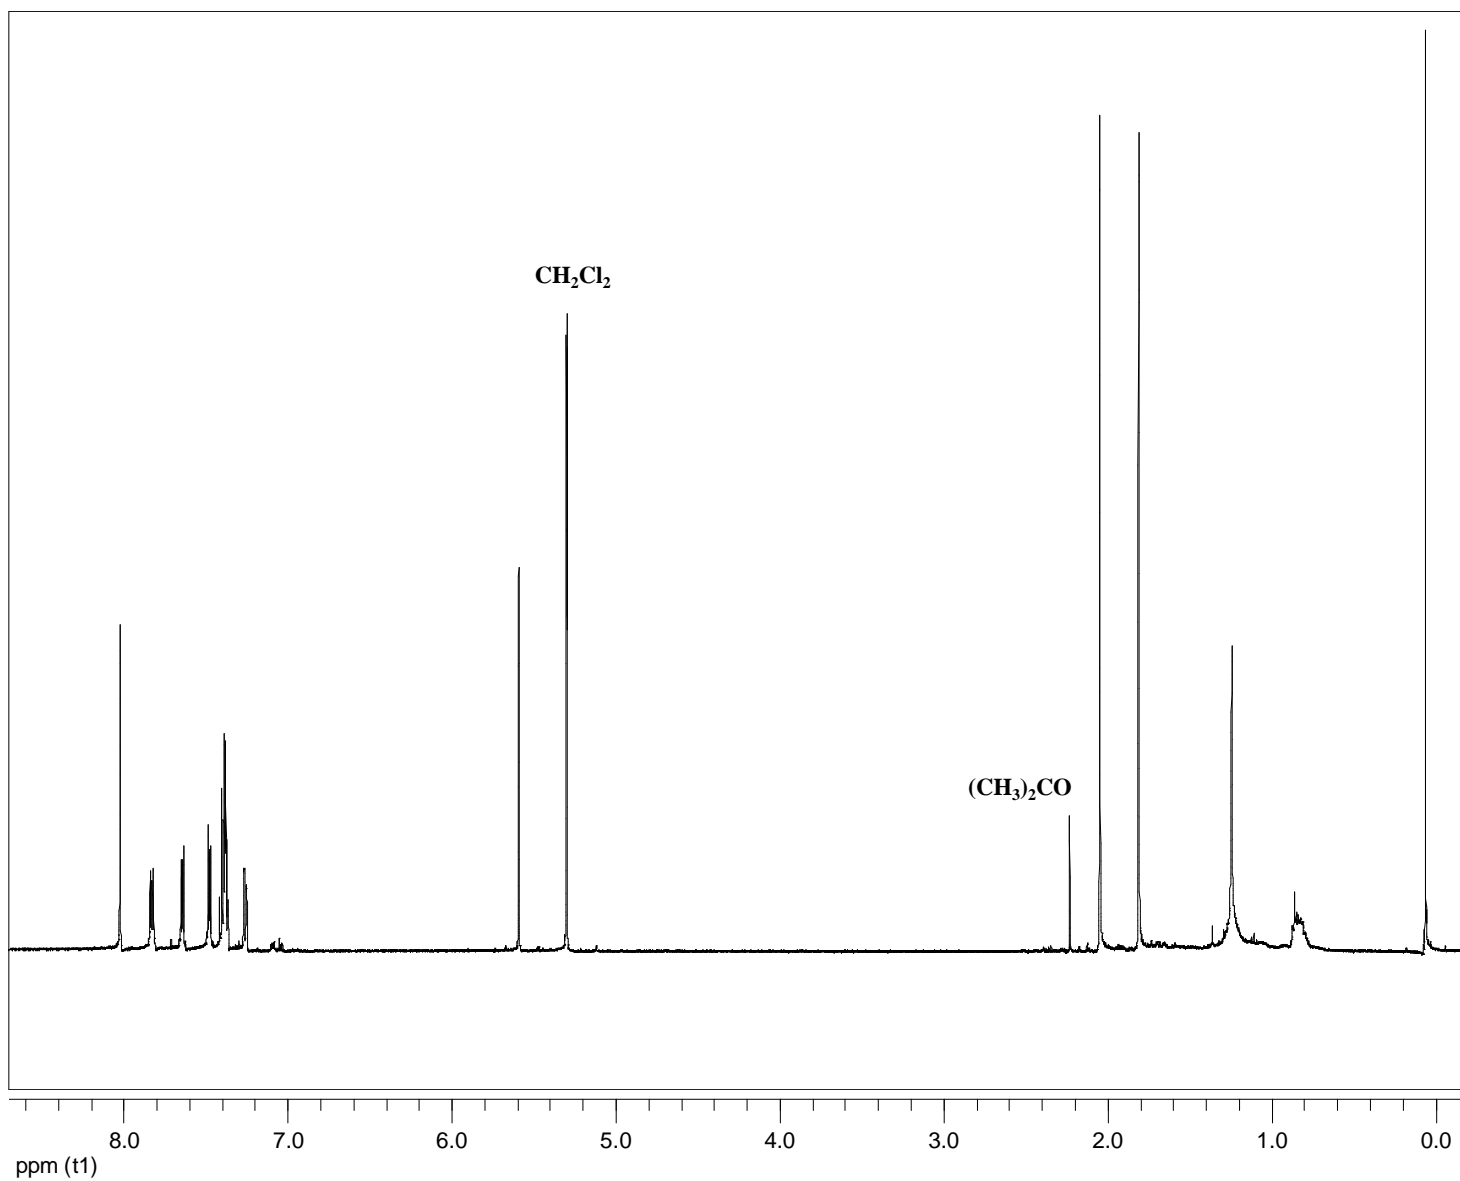

## [60]Fullerene-6,13-bis(2',6'-dimethylphenyl)pentacene monoadduct (3)

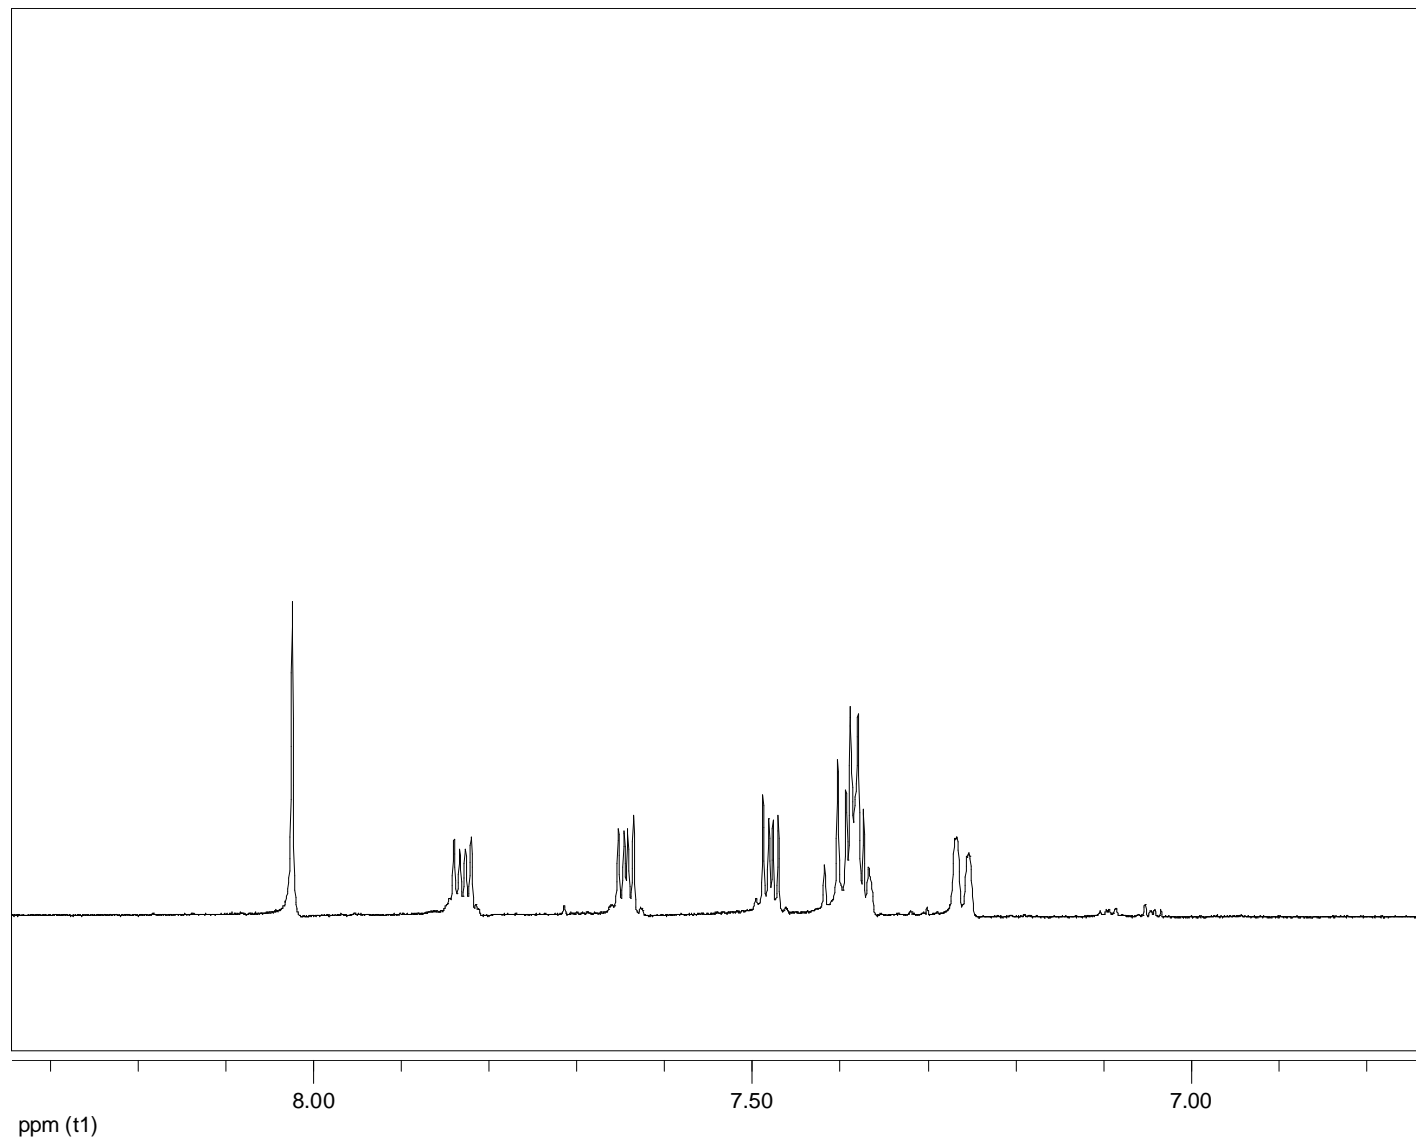

Irvinder Kaur and Glen P. Miller University of New Hampshire

### [60]Fullerene-6,13-bis(2',6'-dimethylphenyl)pentacene monoadduct (3)

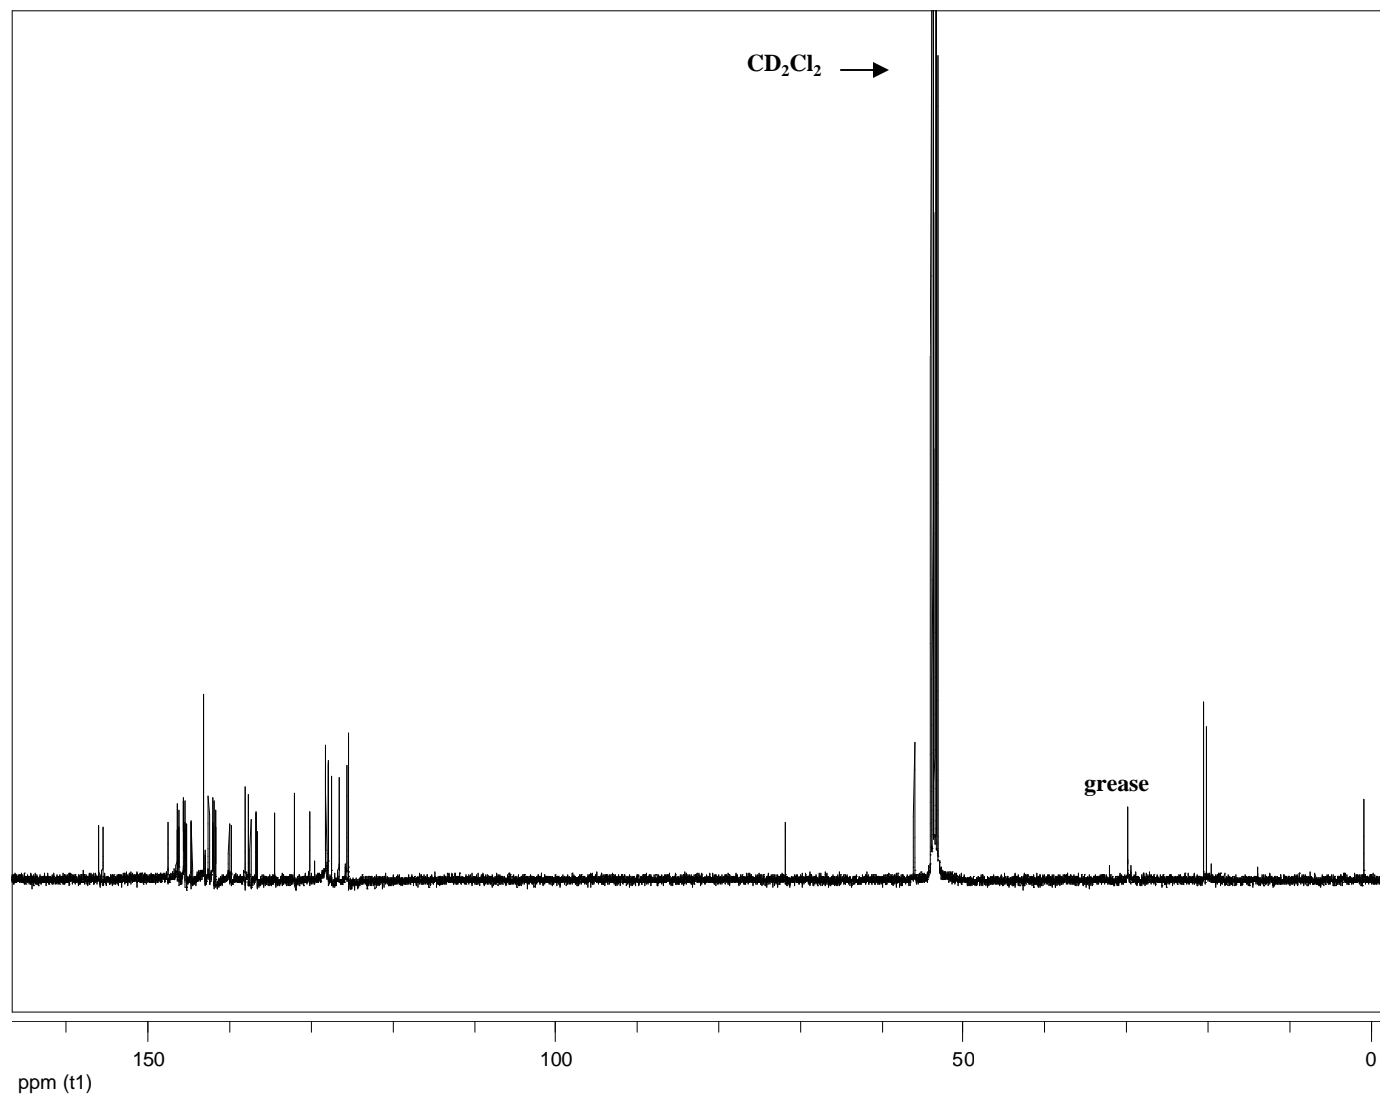



## [60]Fullerene-6,13-bis(2',6'-dimethylphenyl)pentacene monoadduct (3)

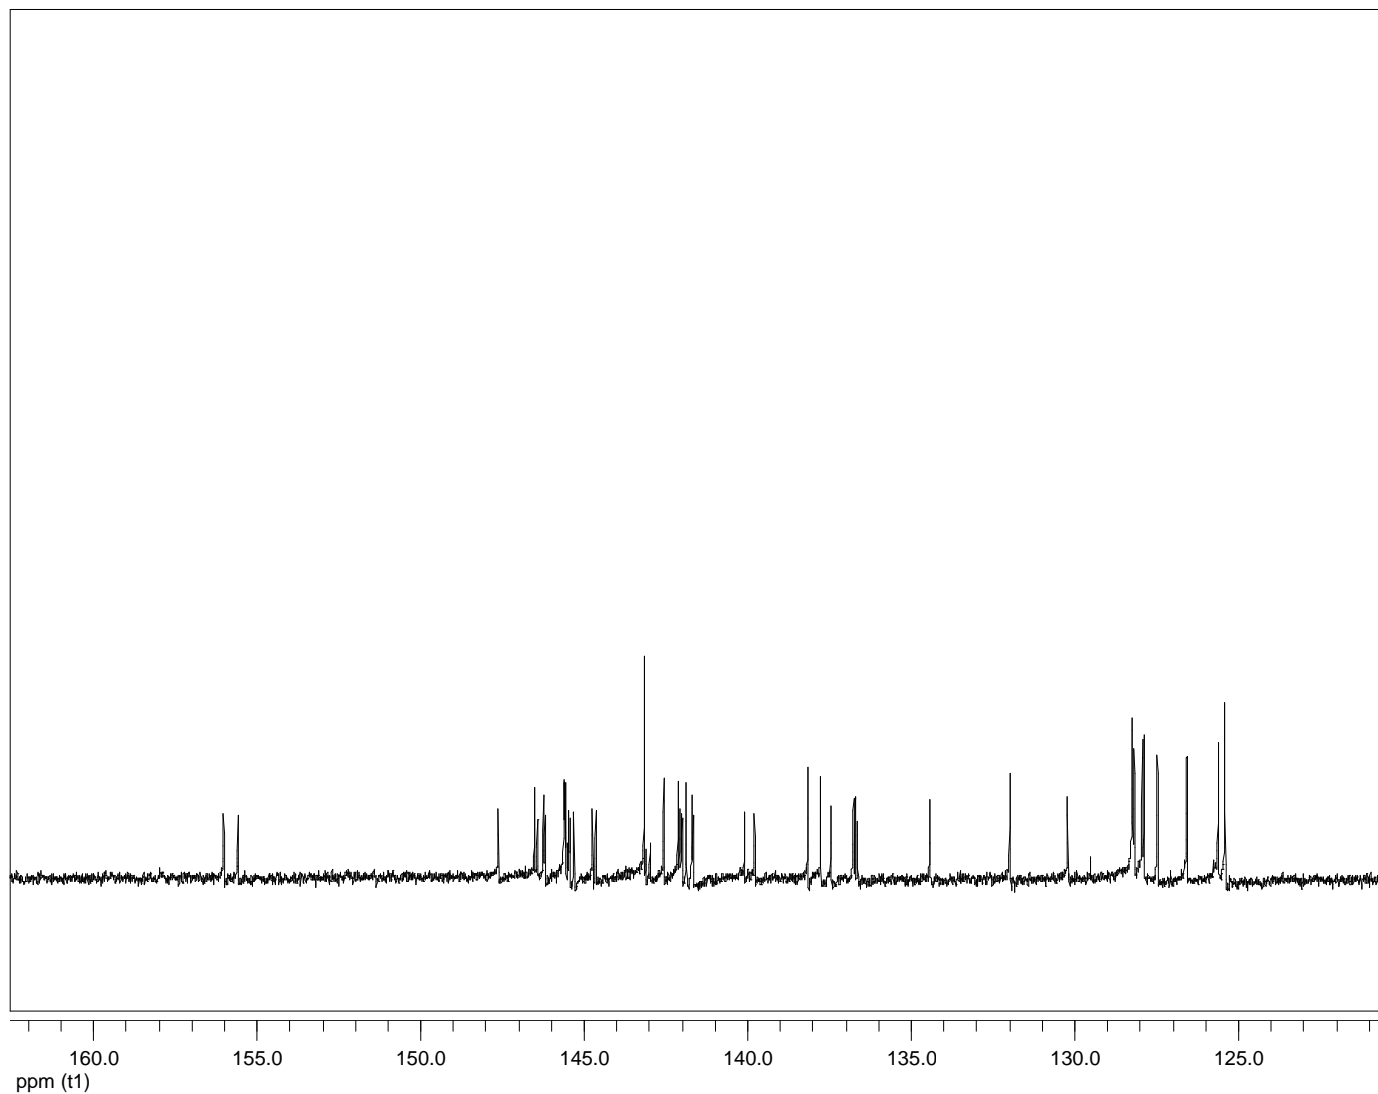

Irvinder Kaur and Glen P. Miller University of New Hampshire

## [60]Fullerene-6,13-bis(2',6'-dimethylphenyl)pentacene monoadduct (3)

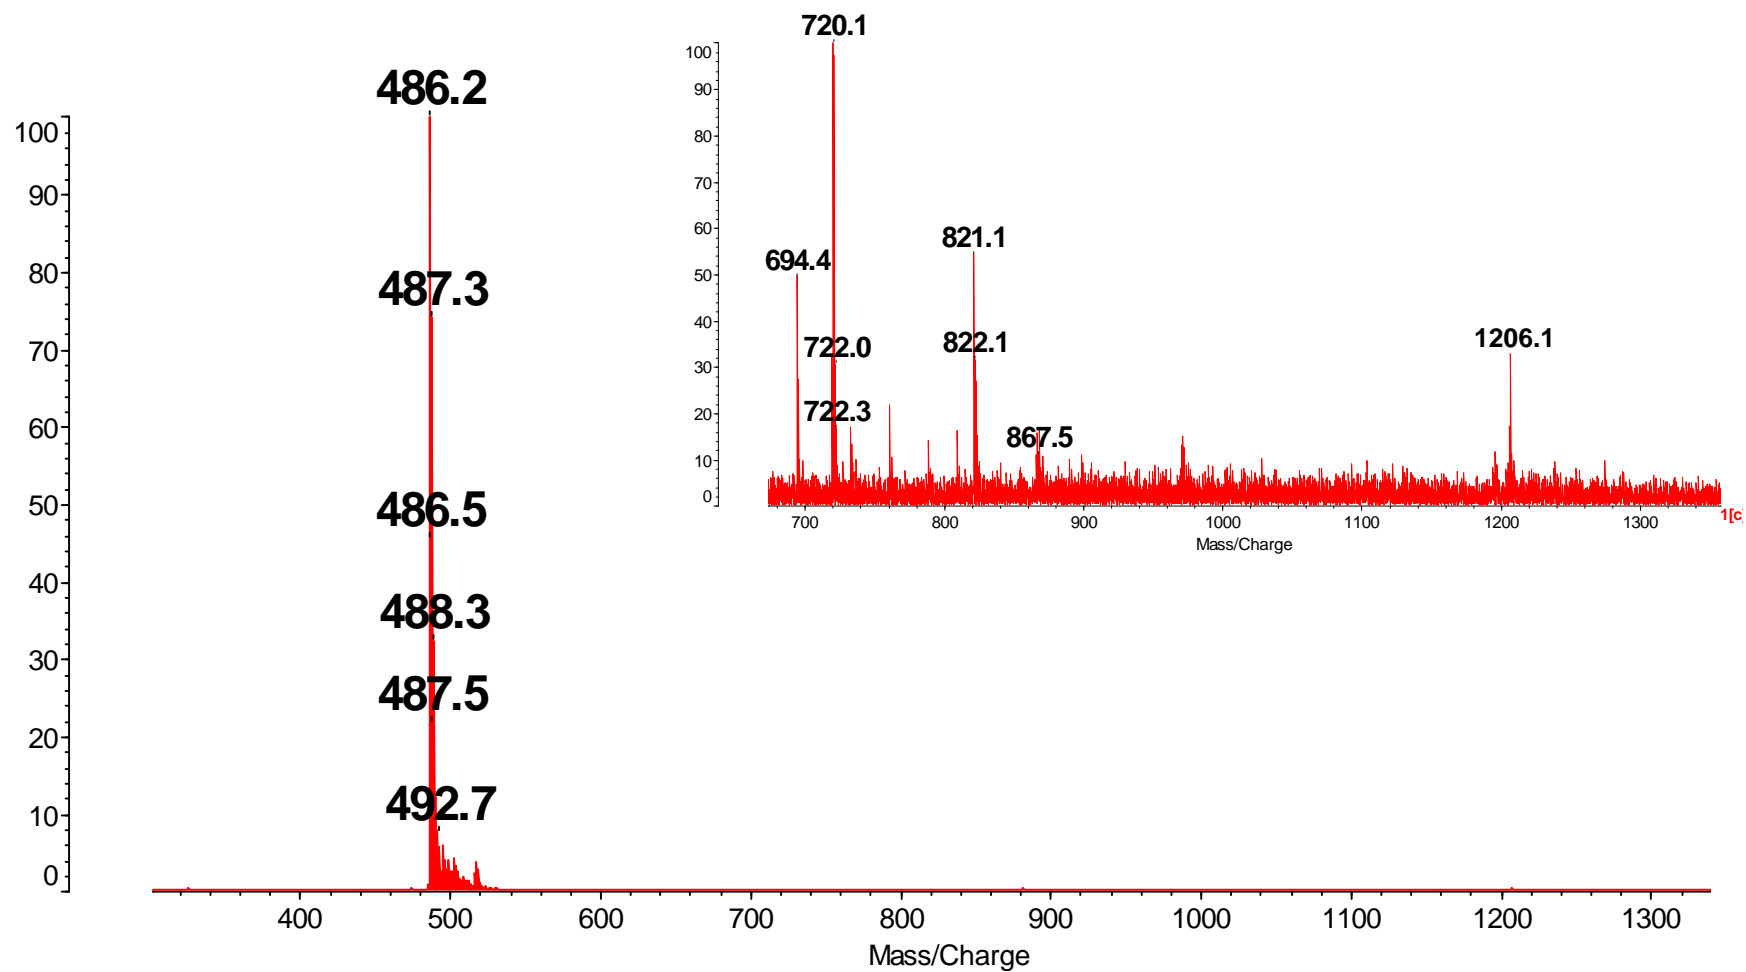

### [60]Fullerene-6,13-bis(2',6'-dimethylphenyl)pentacene monoadduct (3)

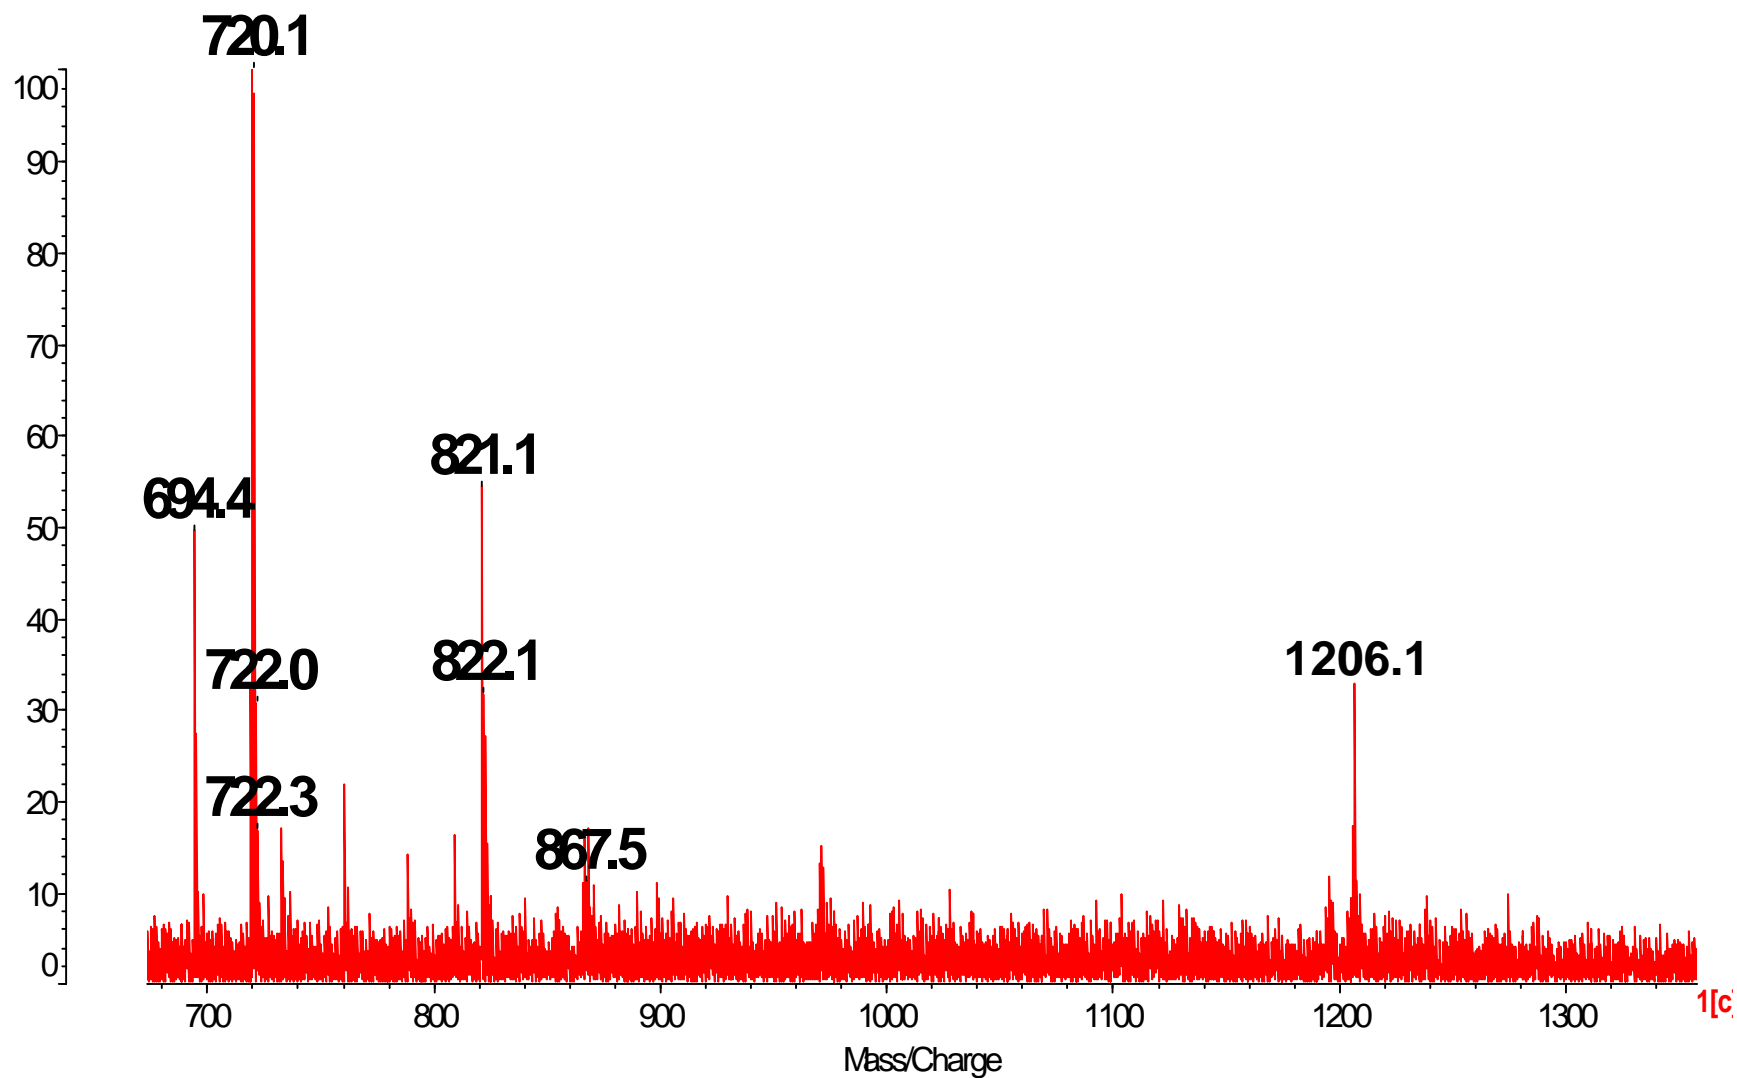

# [60]Fullerene-6,13-bis(2',6'-dimethylphenyl)pentacene-dioxo bisadduct (*syn*-8)

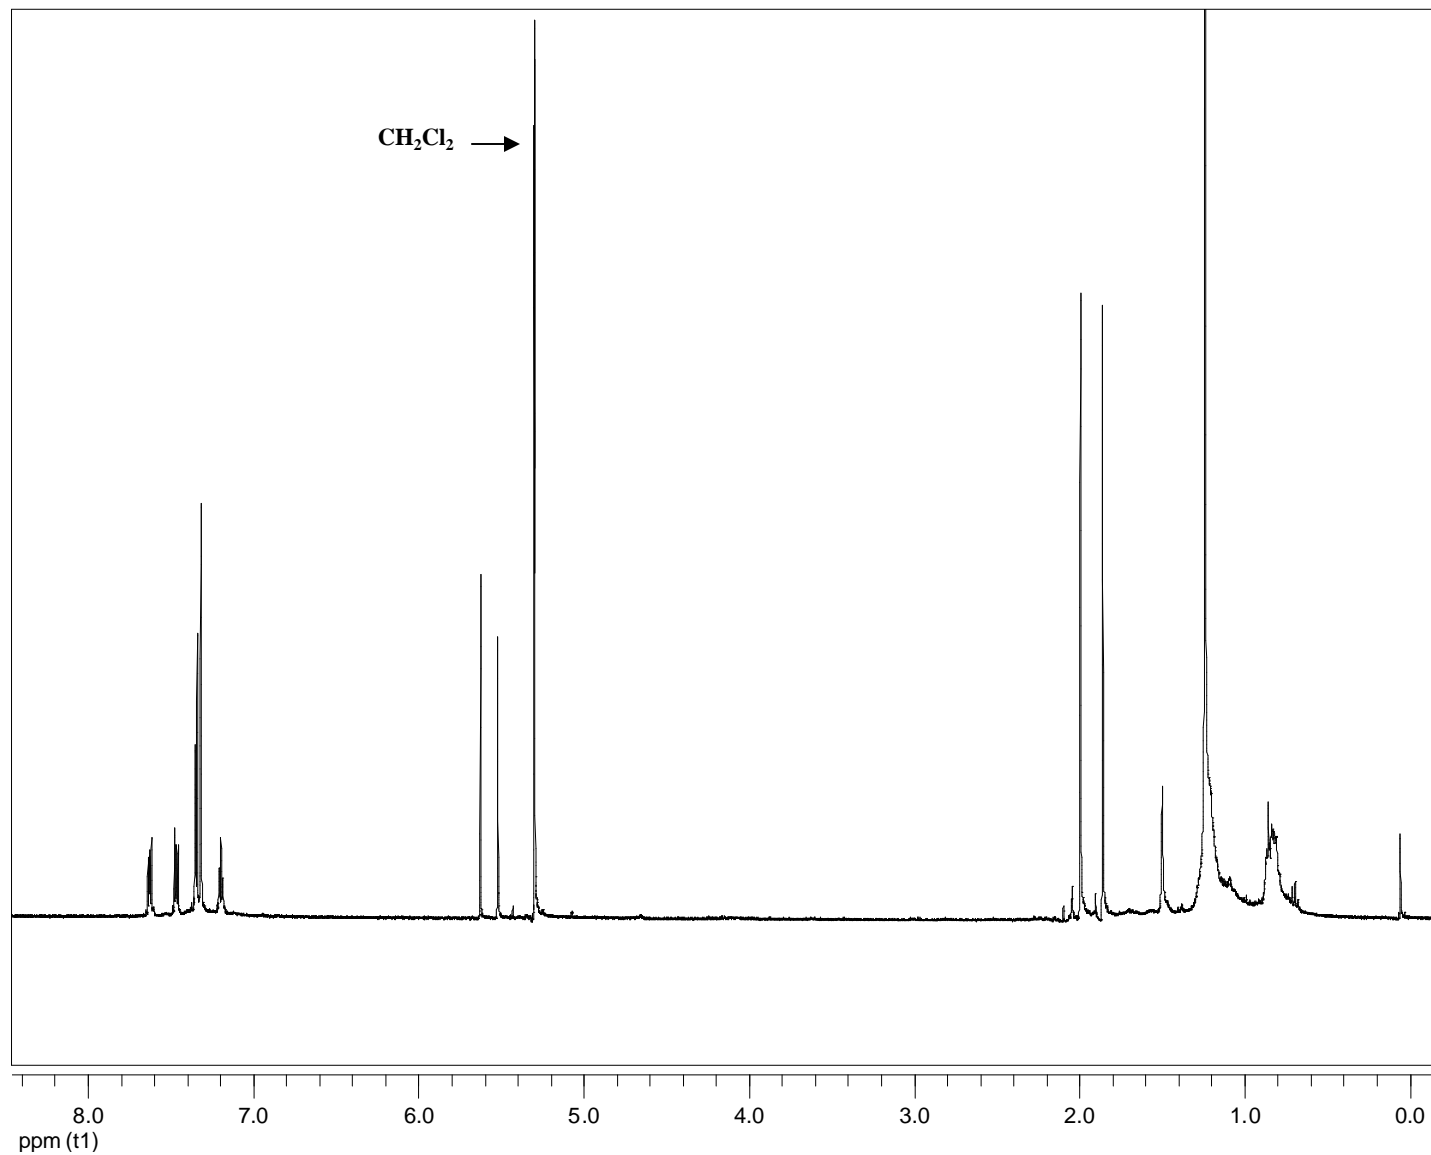

## [60]Fullerene-6,13-bis(2',6'-dimethylphenyl)pentacene-dioxo bisadduct (*syn*-8)

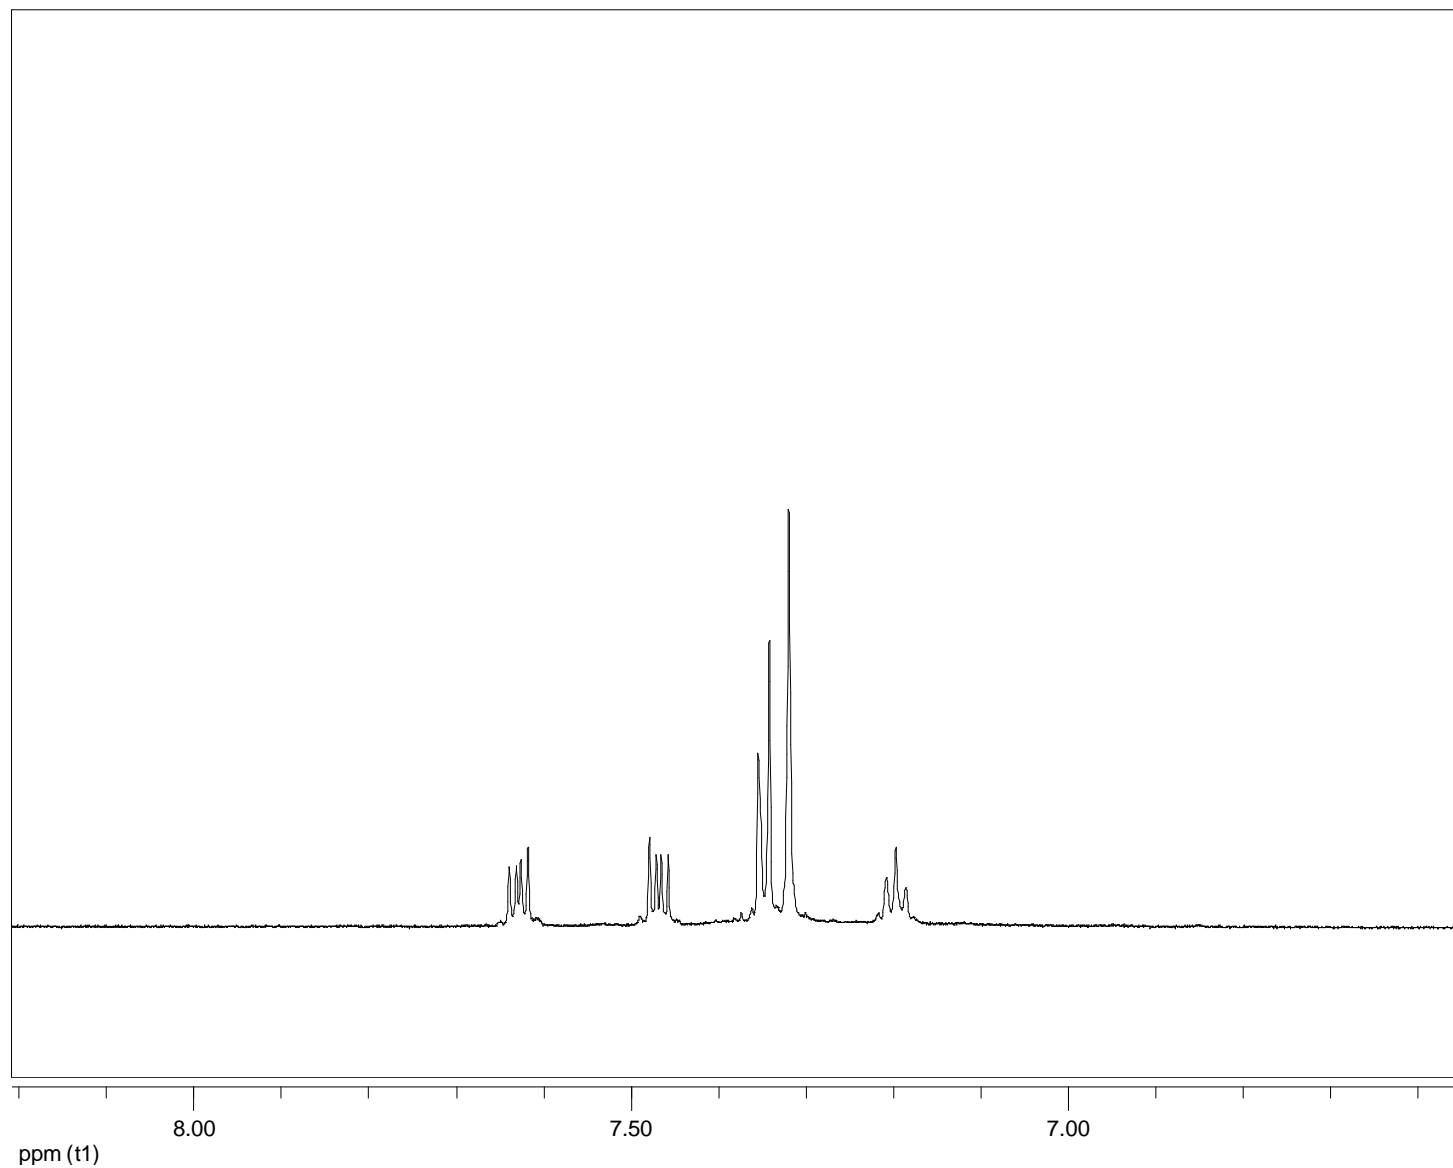

Irvinder Kaur and Glen P. Miller University of New Hampshire

# [60]Fullerene-6,13-bis(2',6'-dimethylphenyl)pentacene-dioxo bisadduct (*syn*-8)

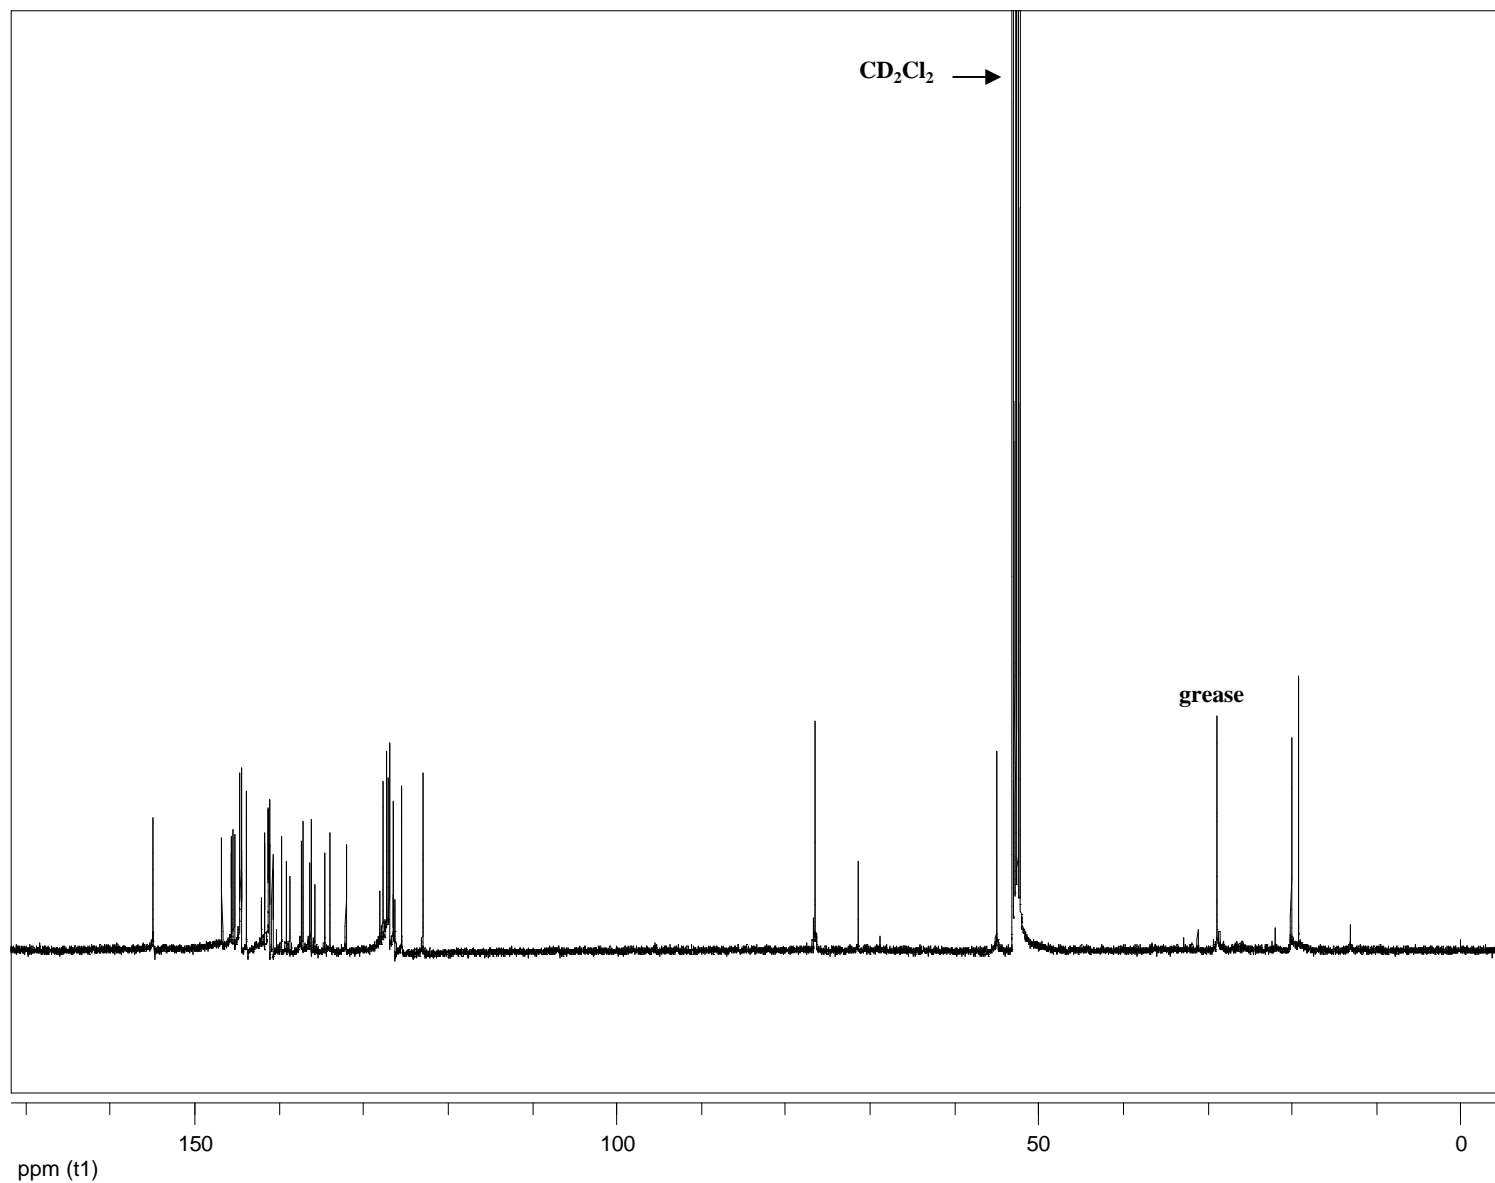

## [60]Fullerene-6,13-bis(2',6'-dimethylphenyl)pentacene-dioxo bisadduct (*syn*-8)

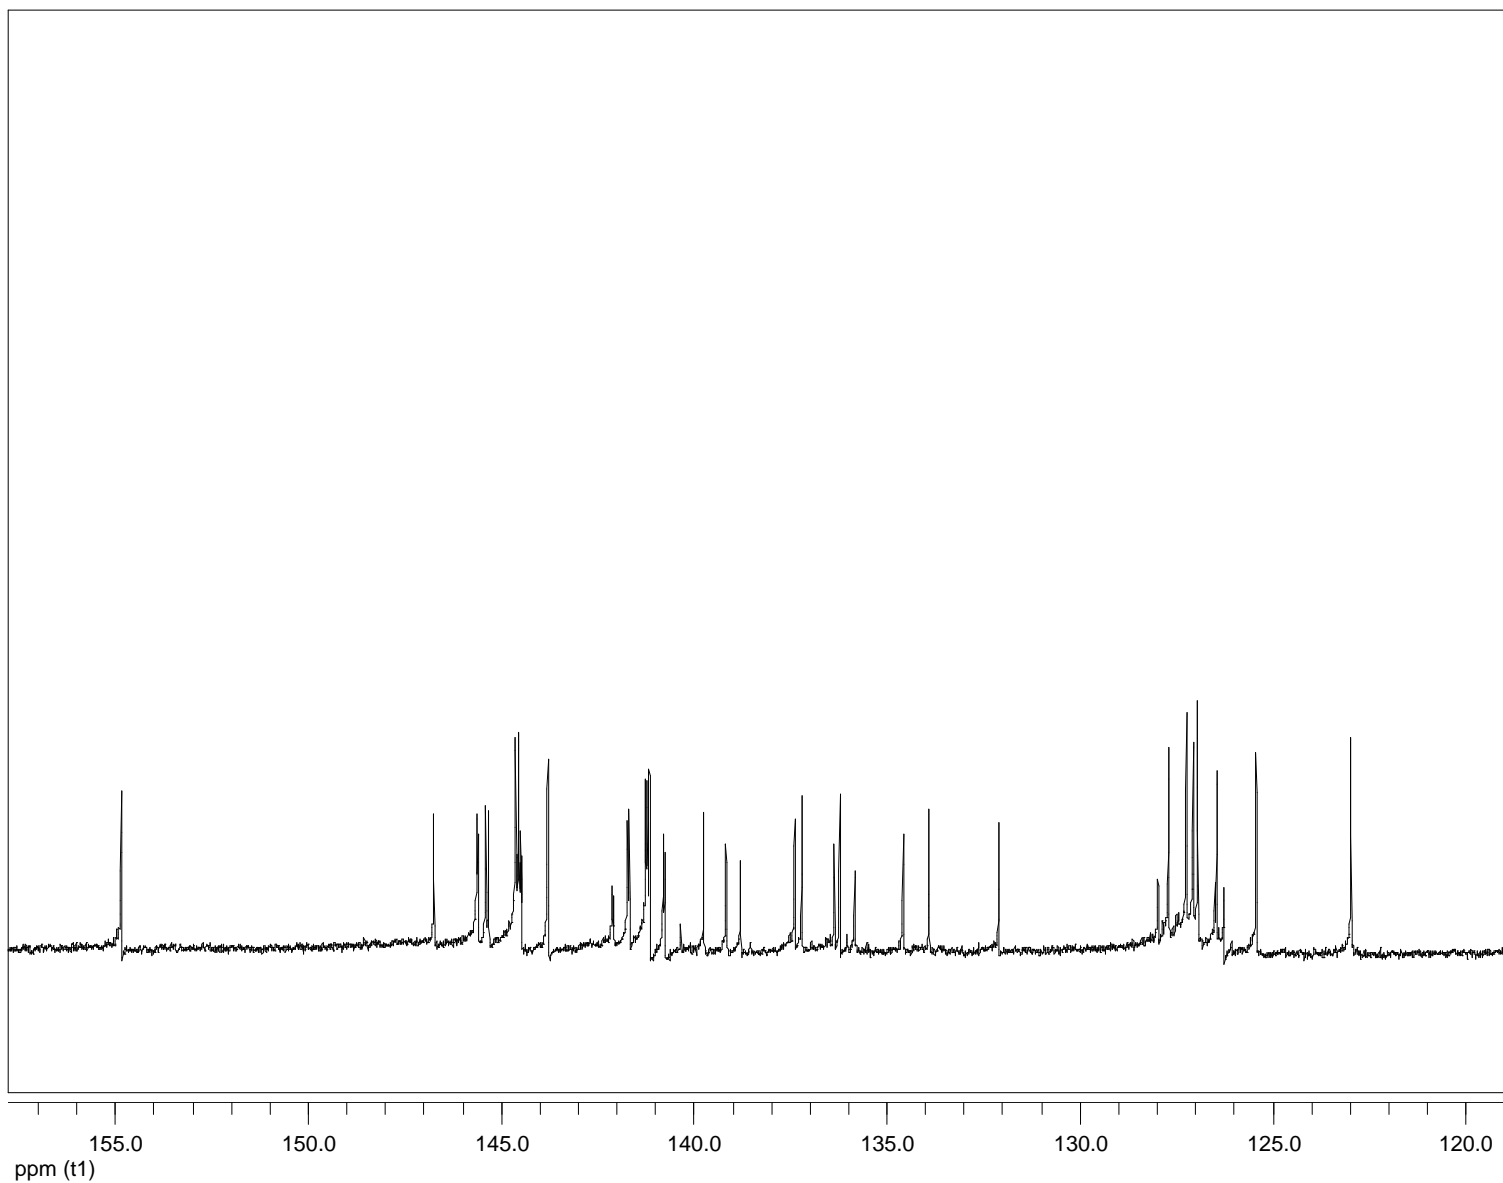

**Irvinder Kaur and Glen P. Miller University of New Hampshire**

## [60]Fullerene-6,13-bis(2',6'-dimethylphenyl)pentacene-dioxo bisadduct (*syn*-8)

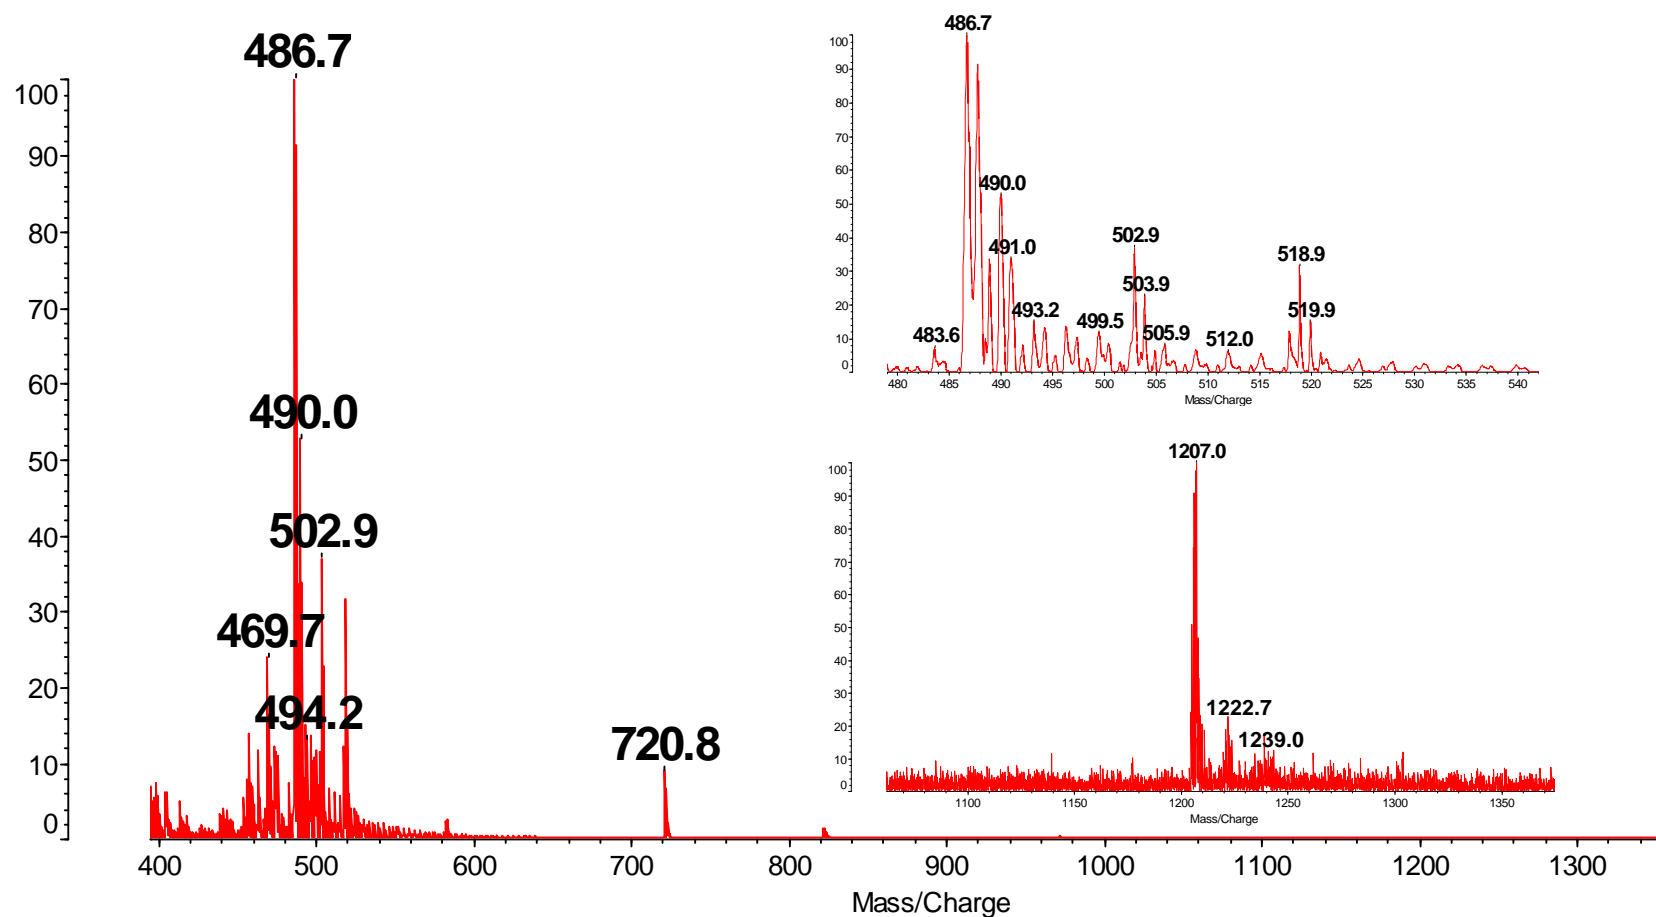



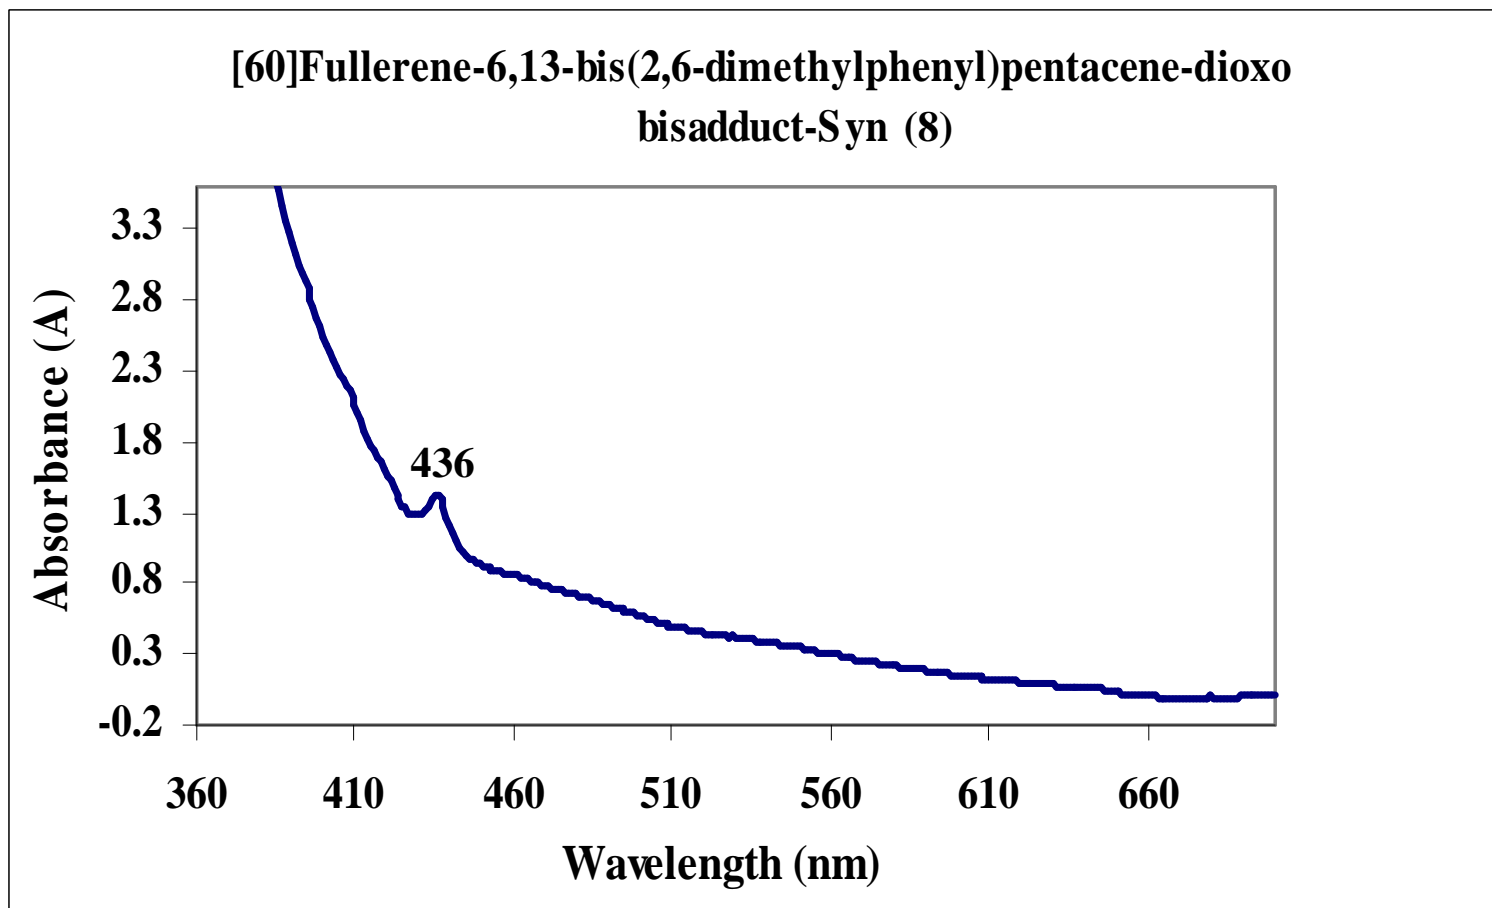

# [60]Fullerene-6,13-bis(2',6'-dimethylphenyl)pentacene-dioxo bisadduct (*anti*-9)

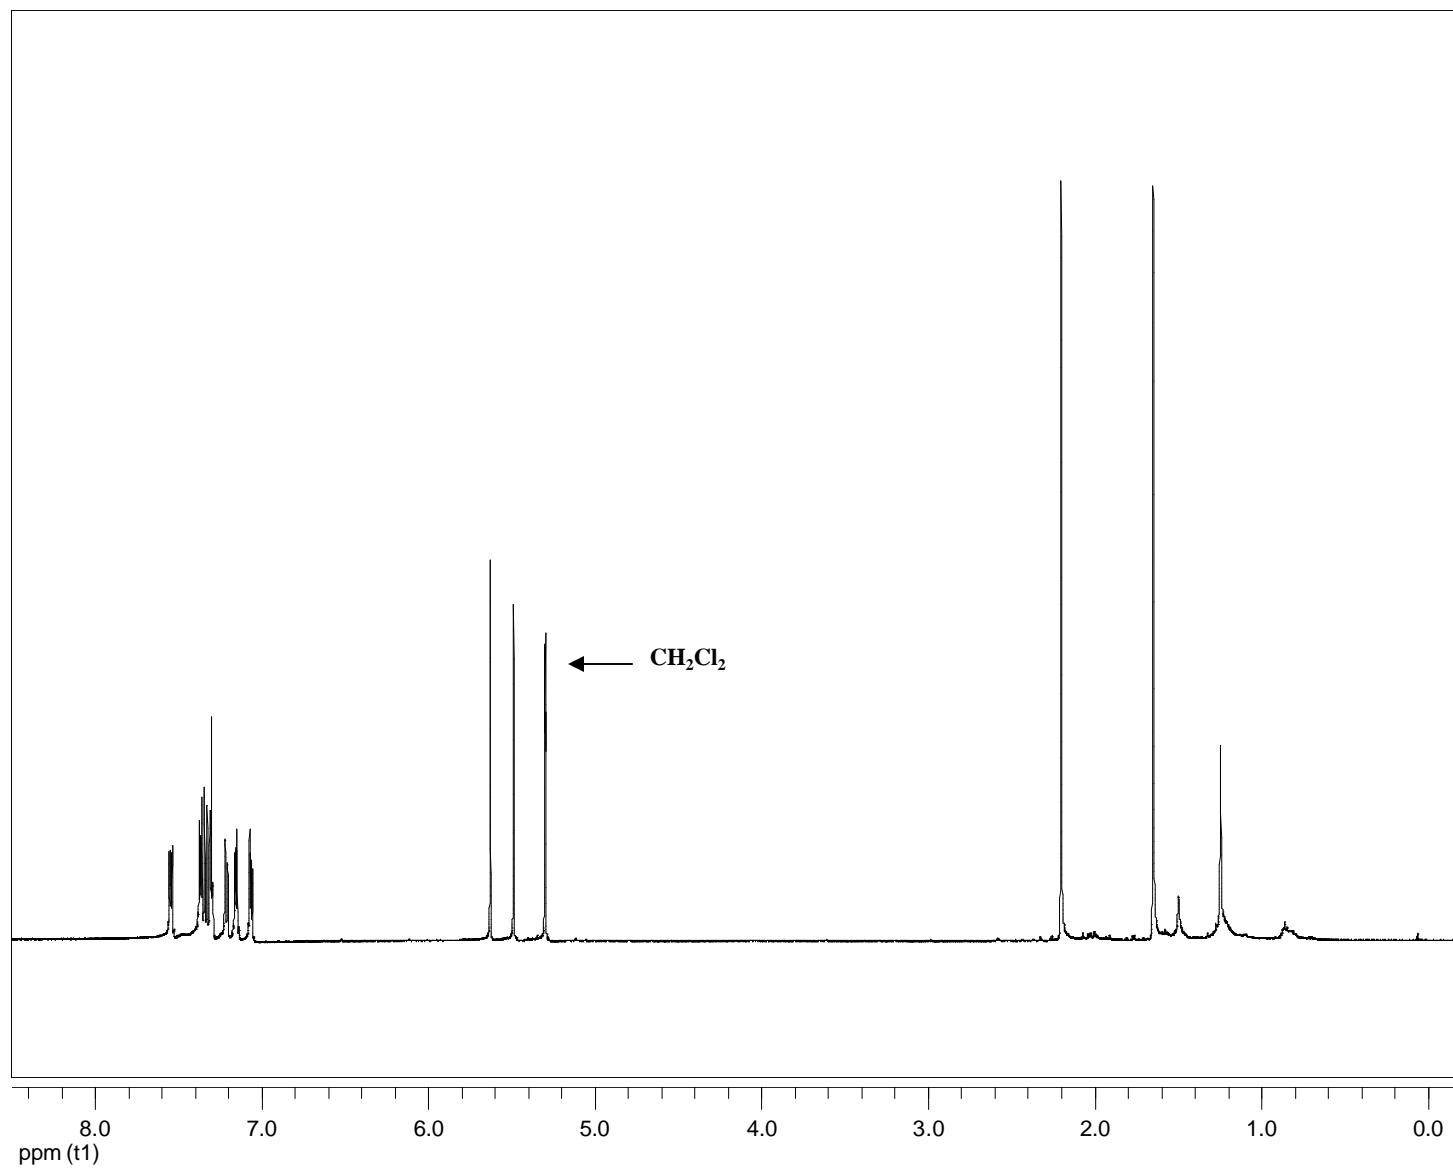

## [60]Fullerene-6,13-bis(2',6'-dimethylphenyl)pentacene-dioxo bisadduct (*anti*-9)

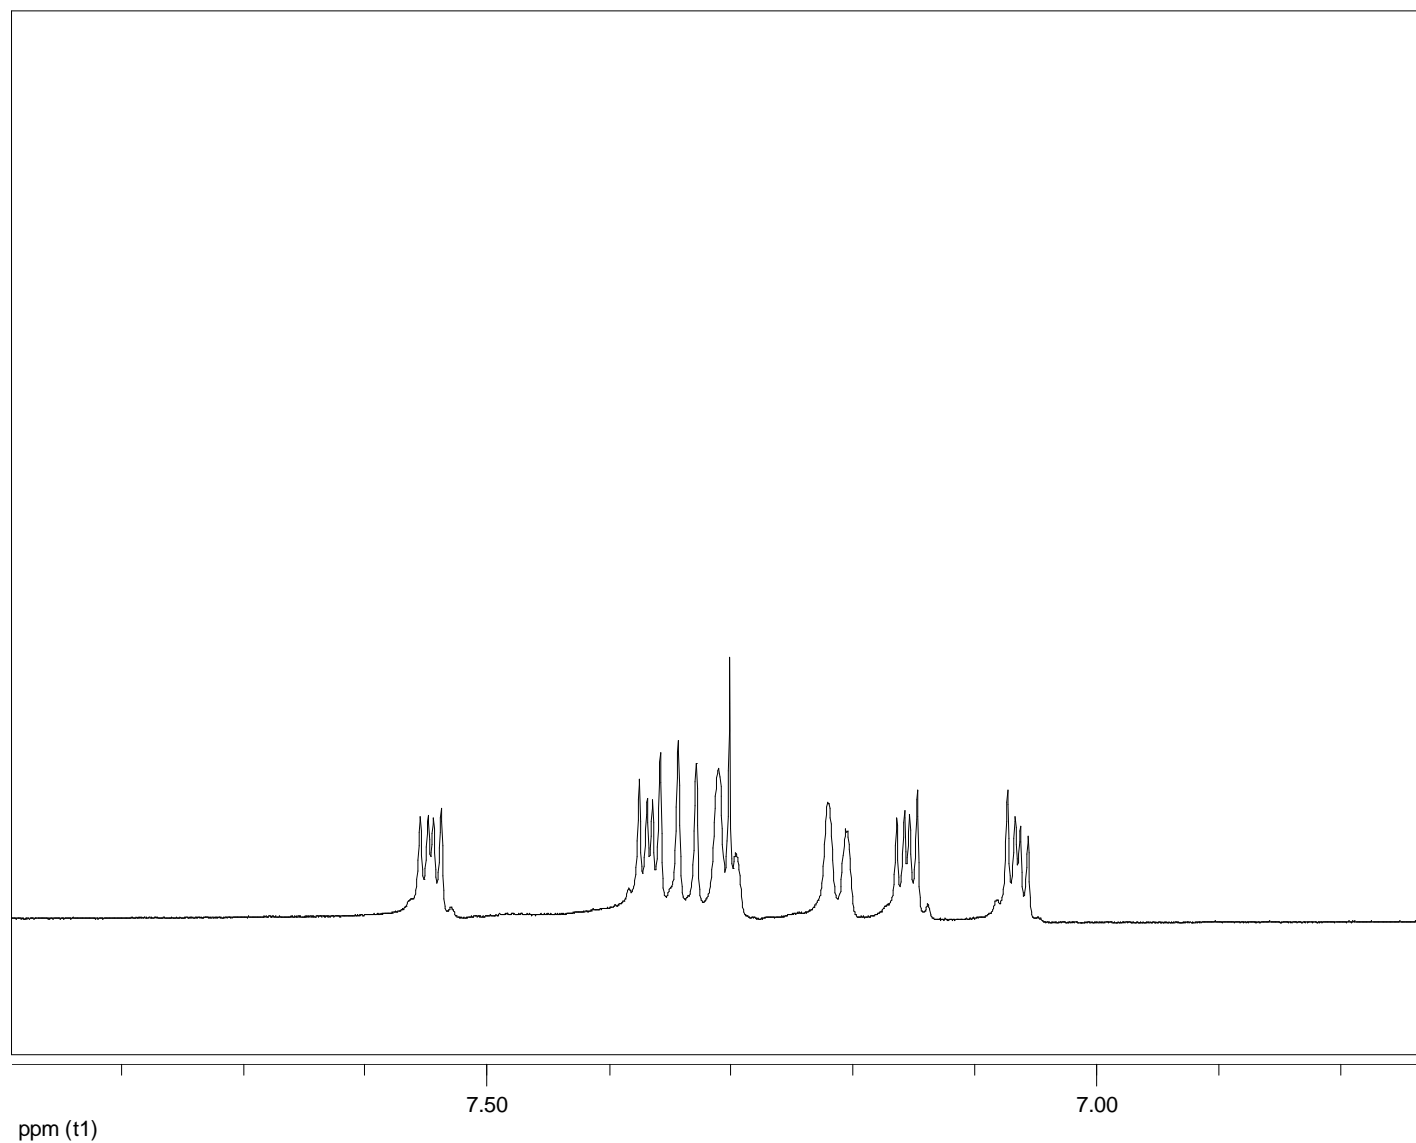

Irvinder Kaur and Glen P. Miller University of New Hampshire

# [60]Fullerene-6,13-bis(2',6'-dimethylphenyl)pentacene-dioxo bisadduct (*anti*-9)

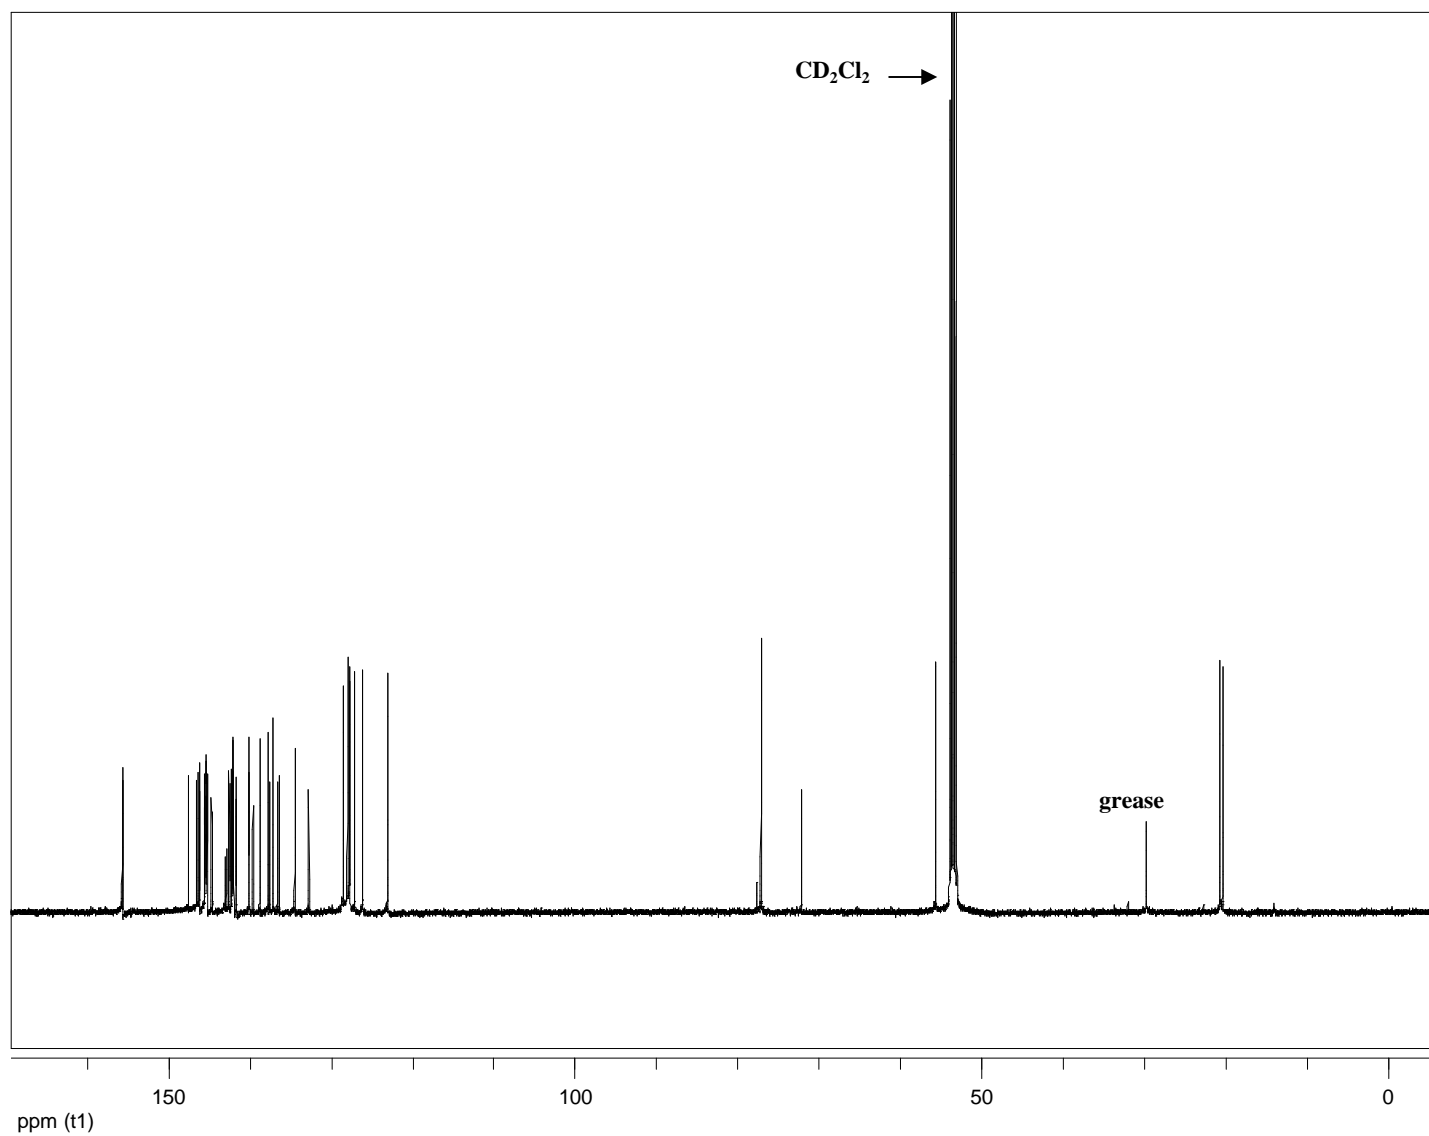

# [60]Fullerene-6,13-bis(2',6'-dimethylphenyl)pentacene-dioxo bisadduct (*anti*-9)

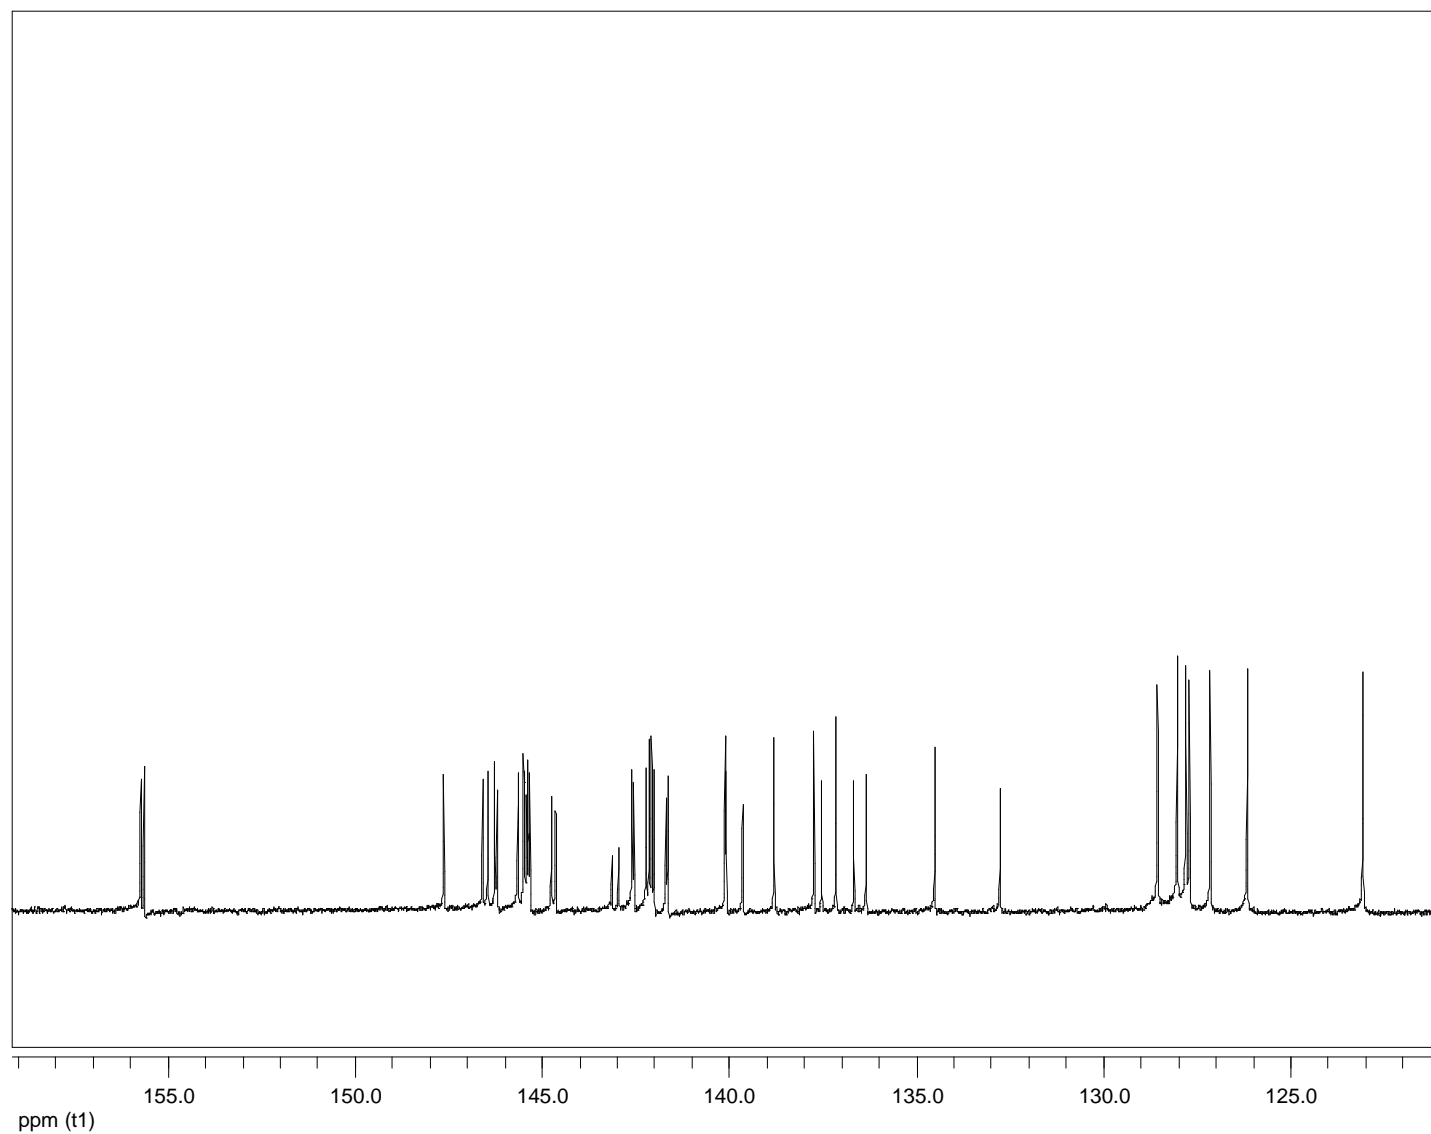

Irvinder Kaur and Glen P. Miller University of New Hampshire

# [60]Fullerene-6,13-bis(2',6'-dimethylphenyl)pentacene-dioxo bisadduct (*anti*-9)

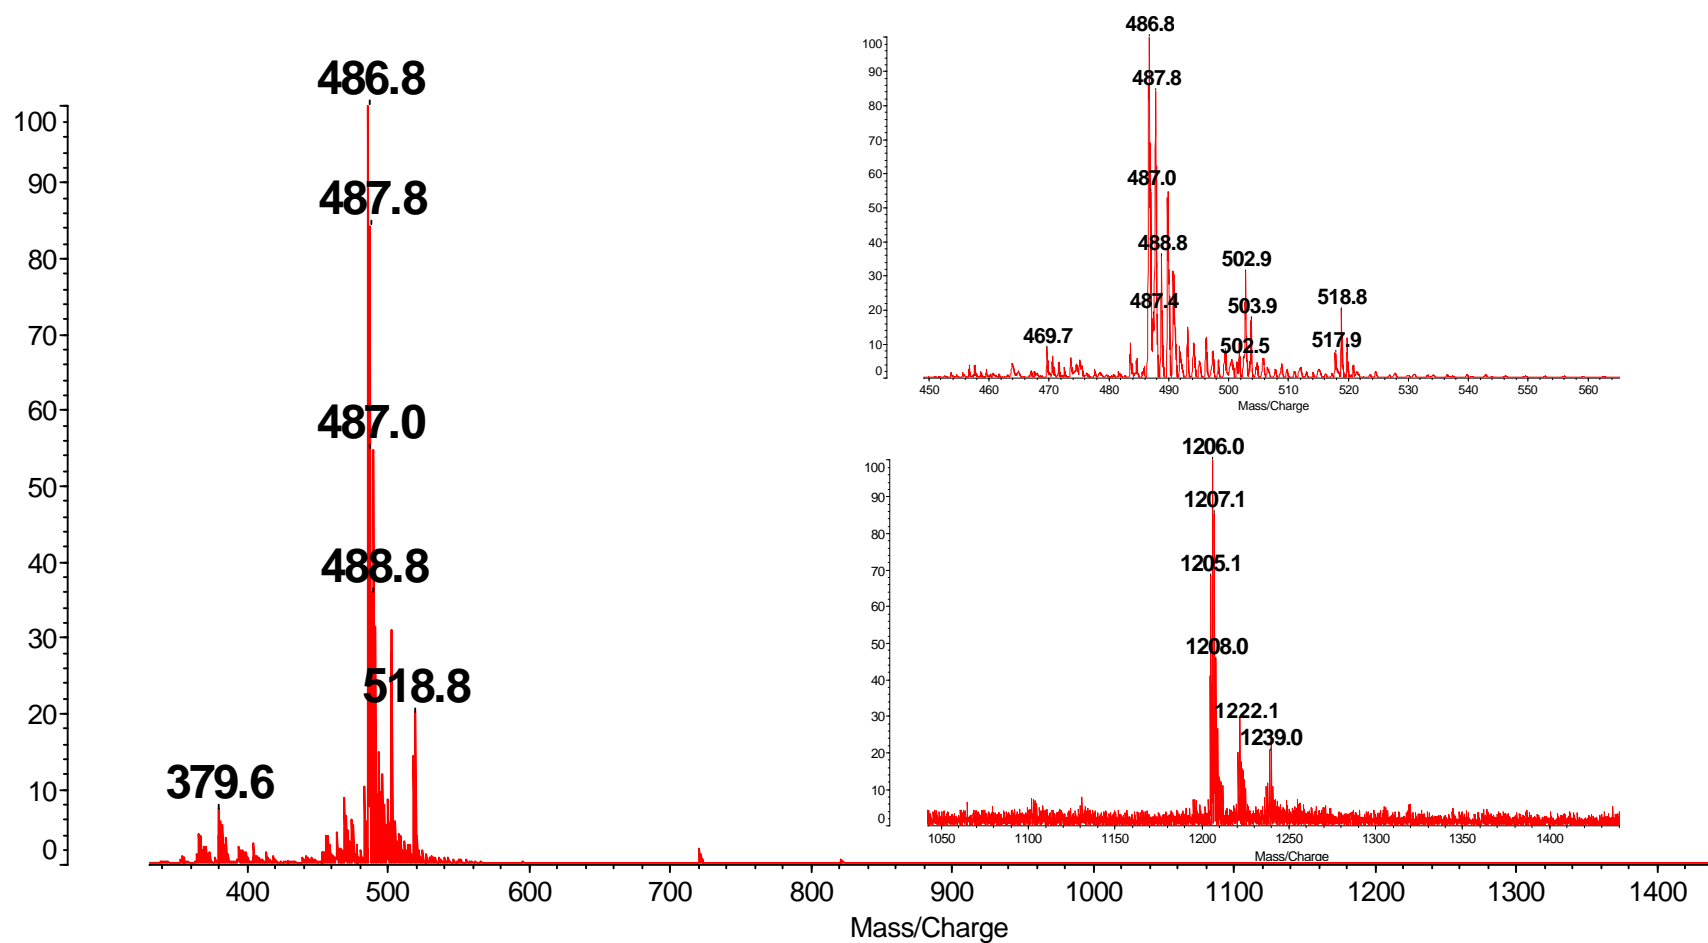

## [60]Fullerene-6,13-bis(2',6'-dimethylphenyl)pentacene-dioxo bisadduct (*anti*-9)

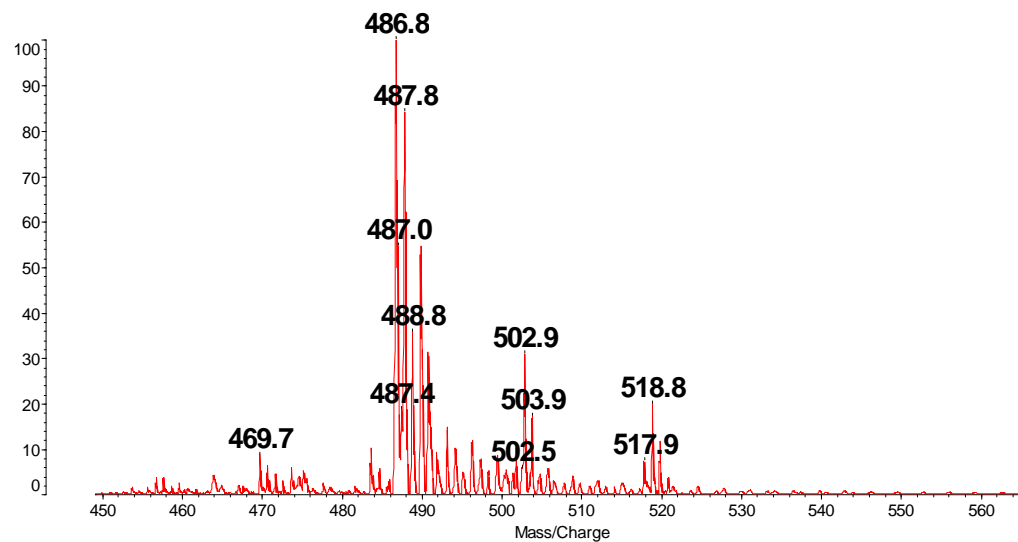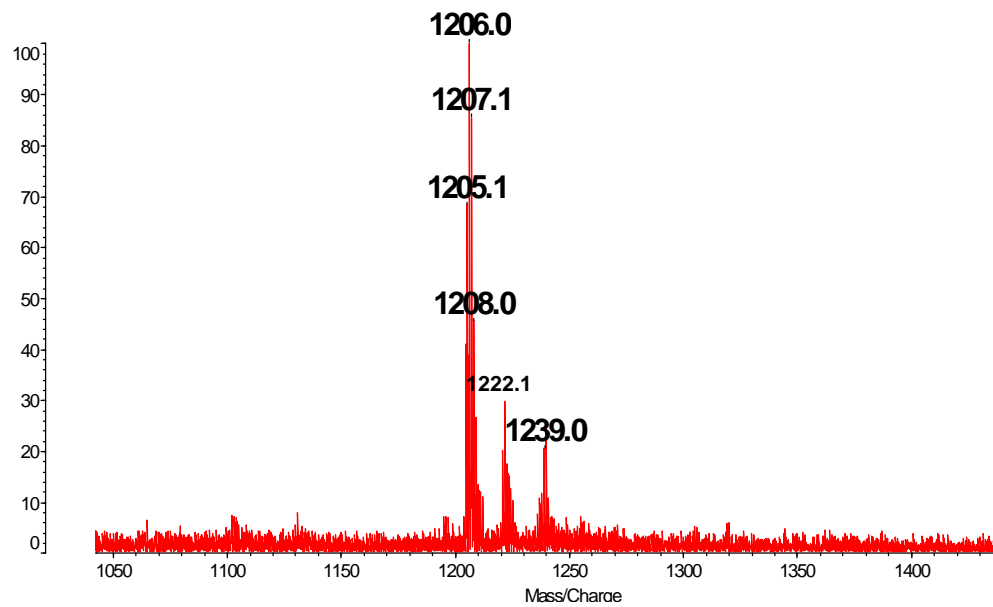

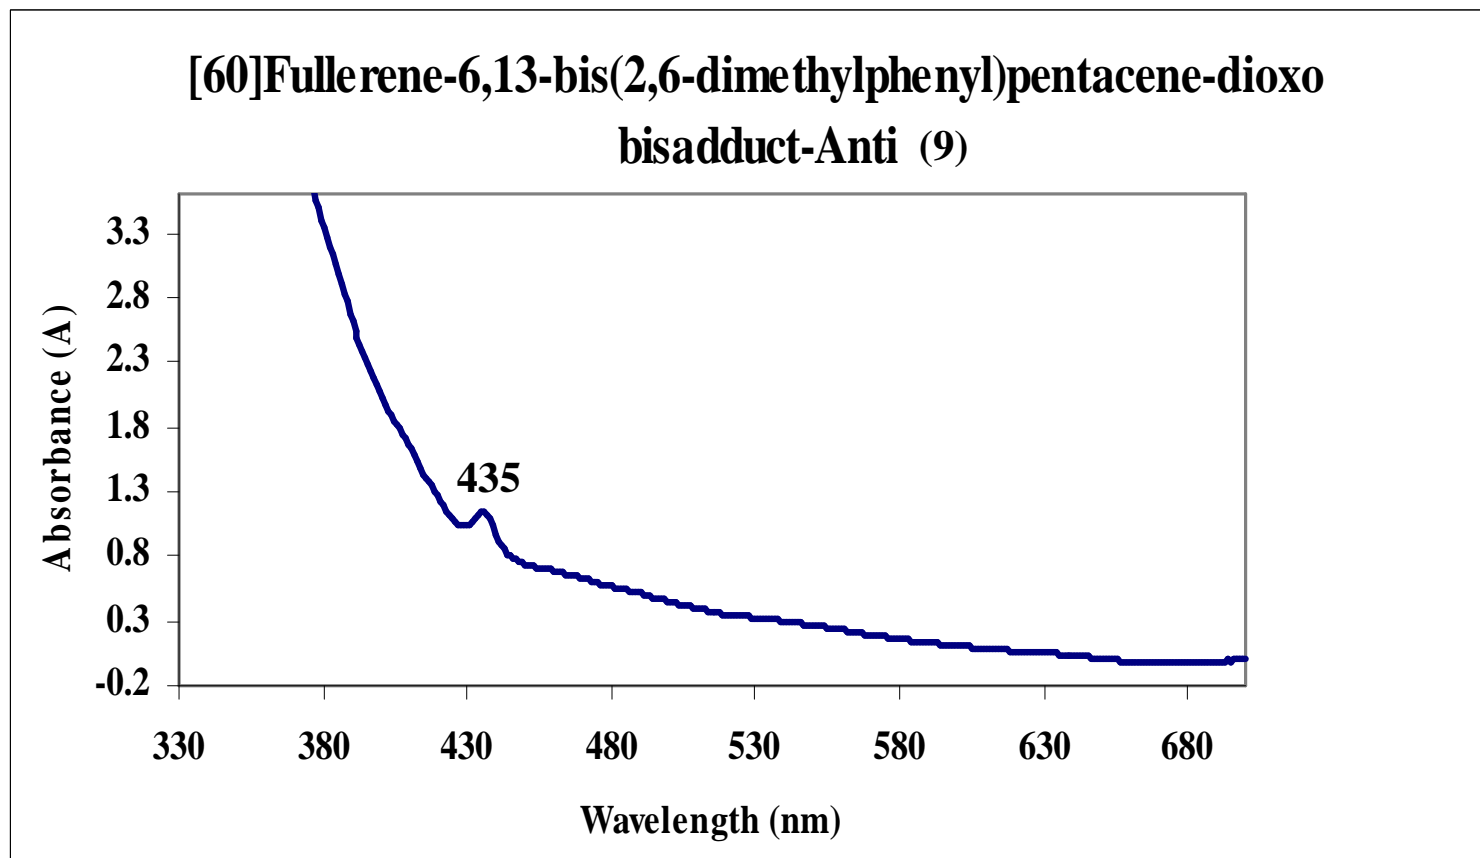



## [60]Fullerene-6,13-bis(2',6'-diethylphenyl)pentacene monoadduct (4)

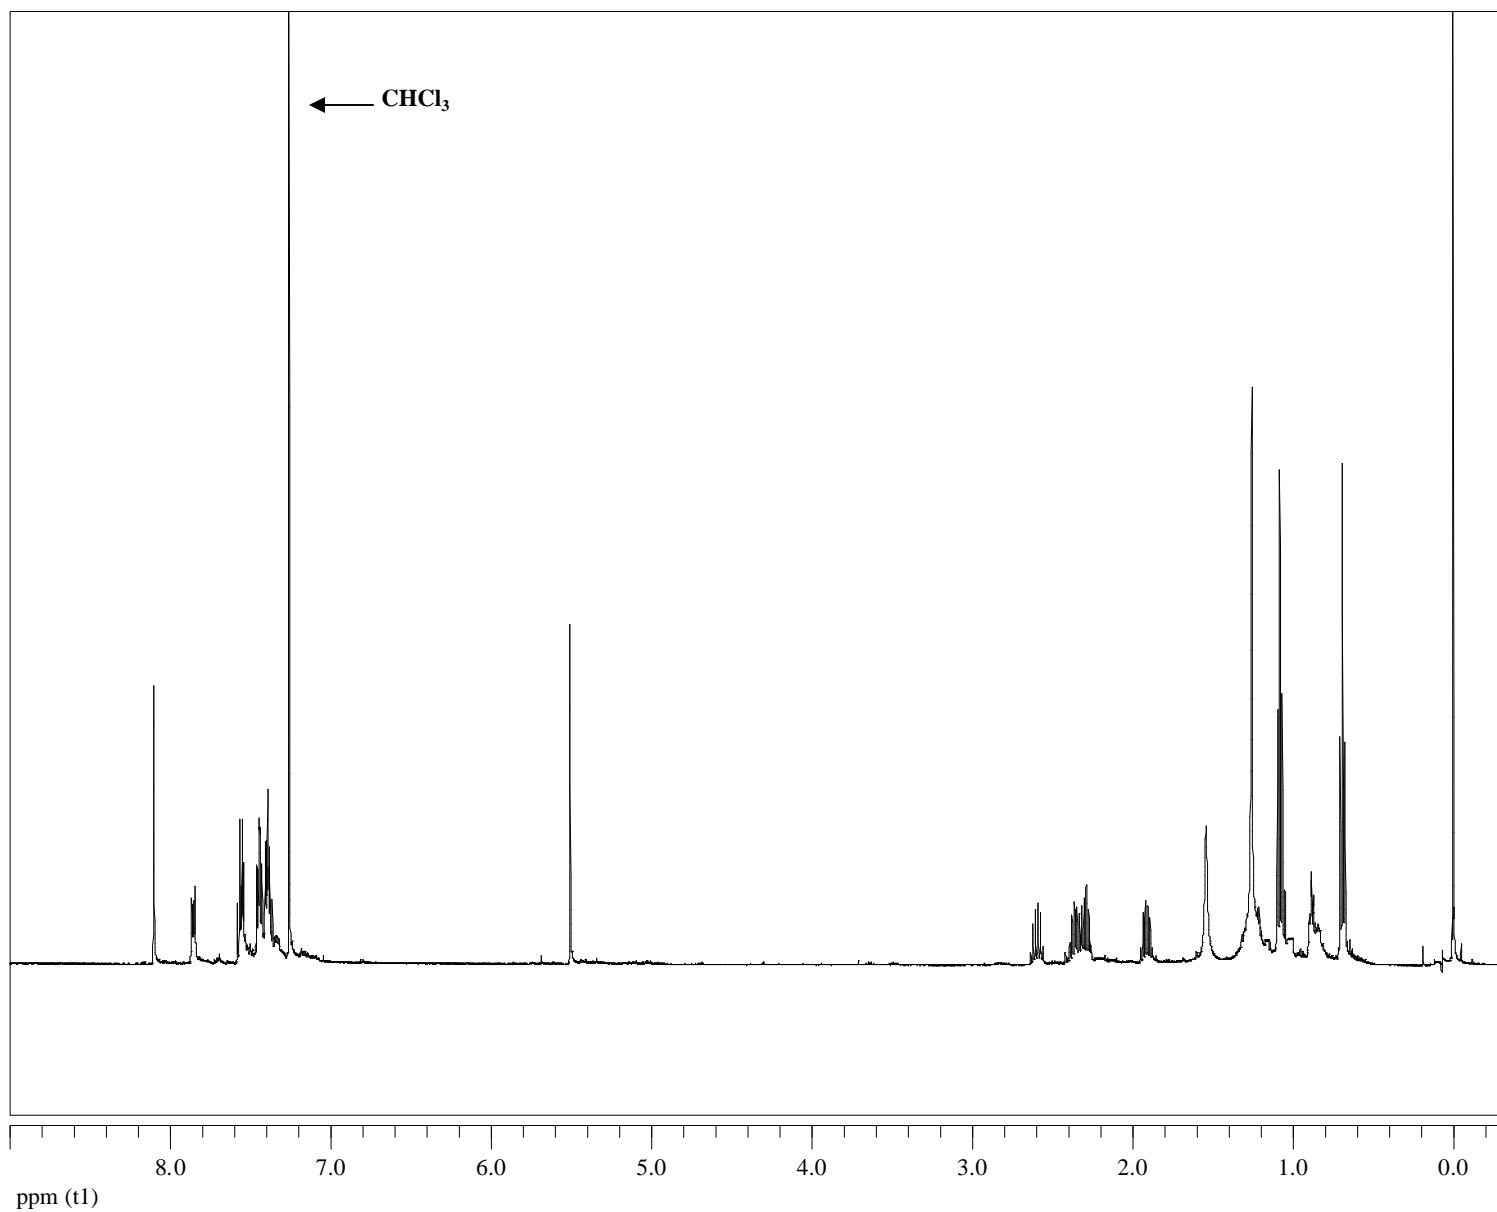

## [60]Fullerene-6,13-bis(2',6'-diethylphenyl)pentacene monoadduct (4)

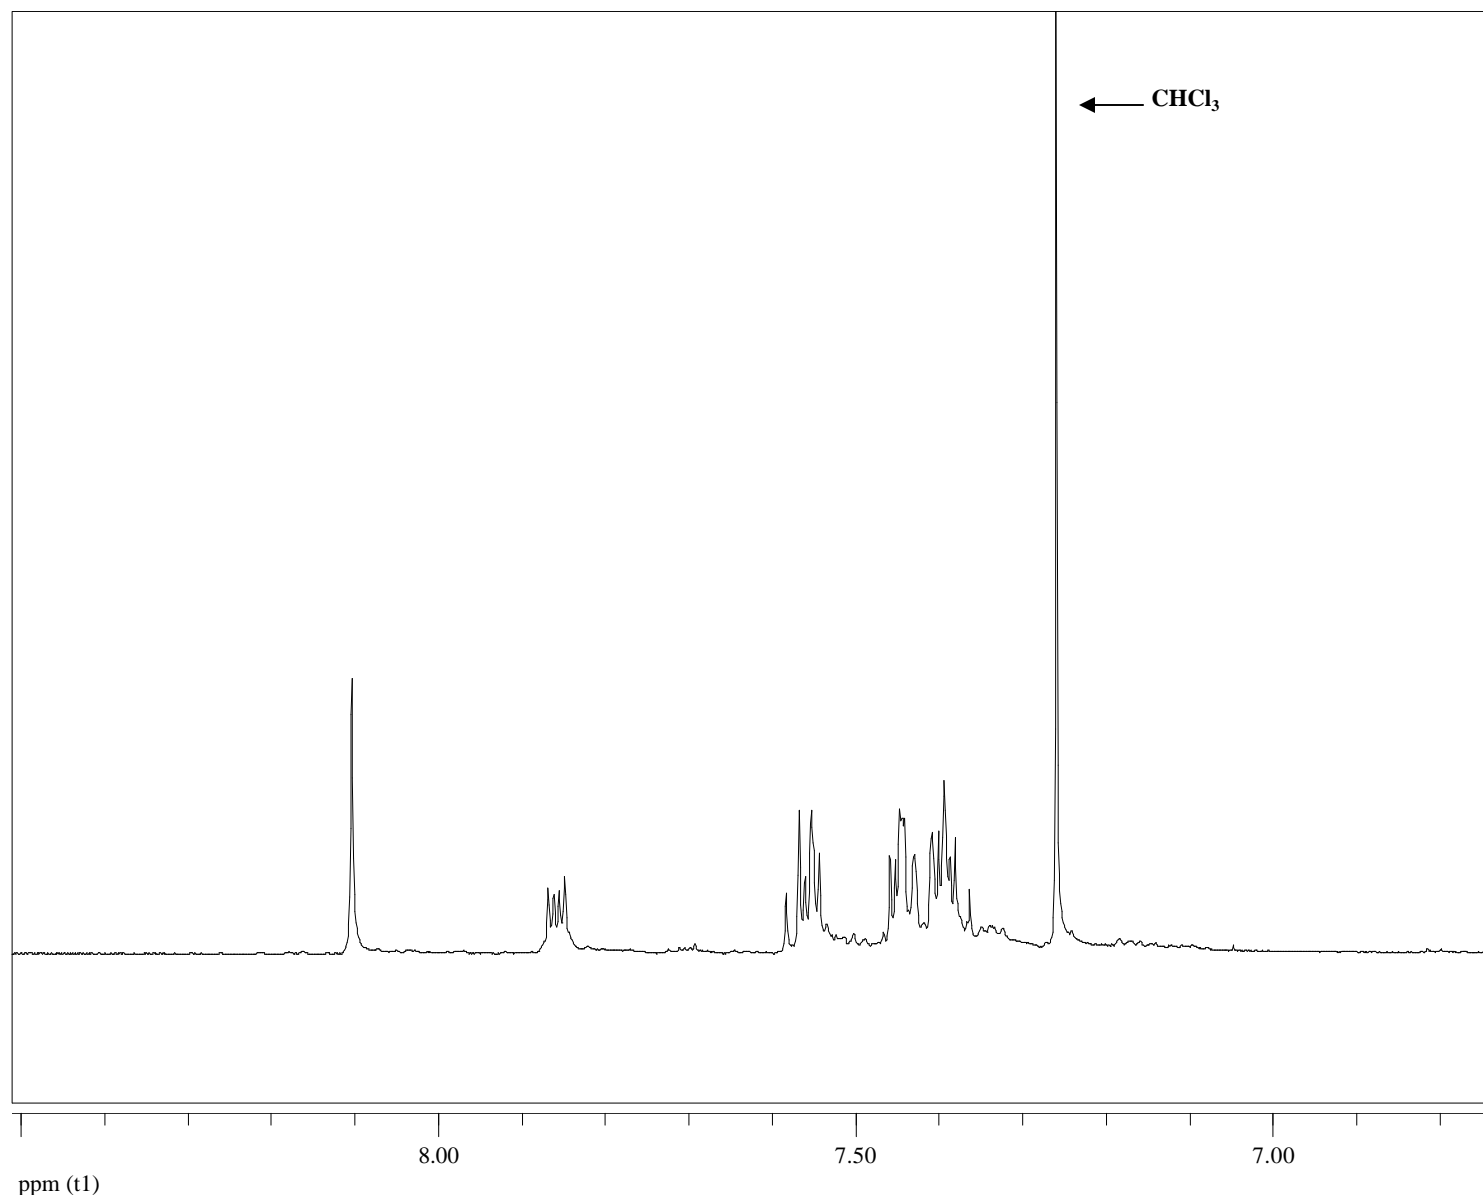

## [60]Fullerene-6,13-bis(2',6'-diethylphenyl)pentacene monoadduct (4)

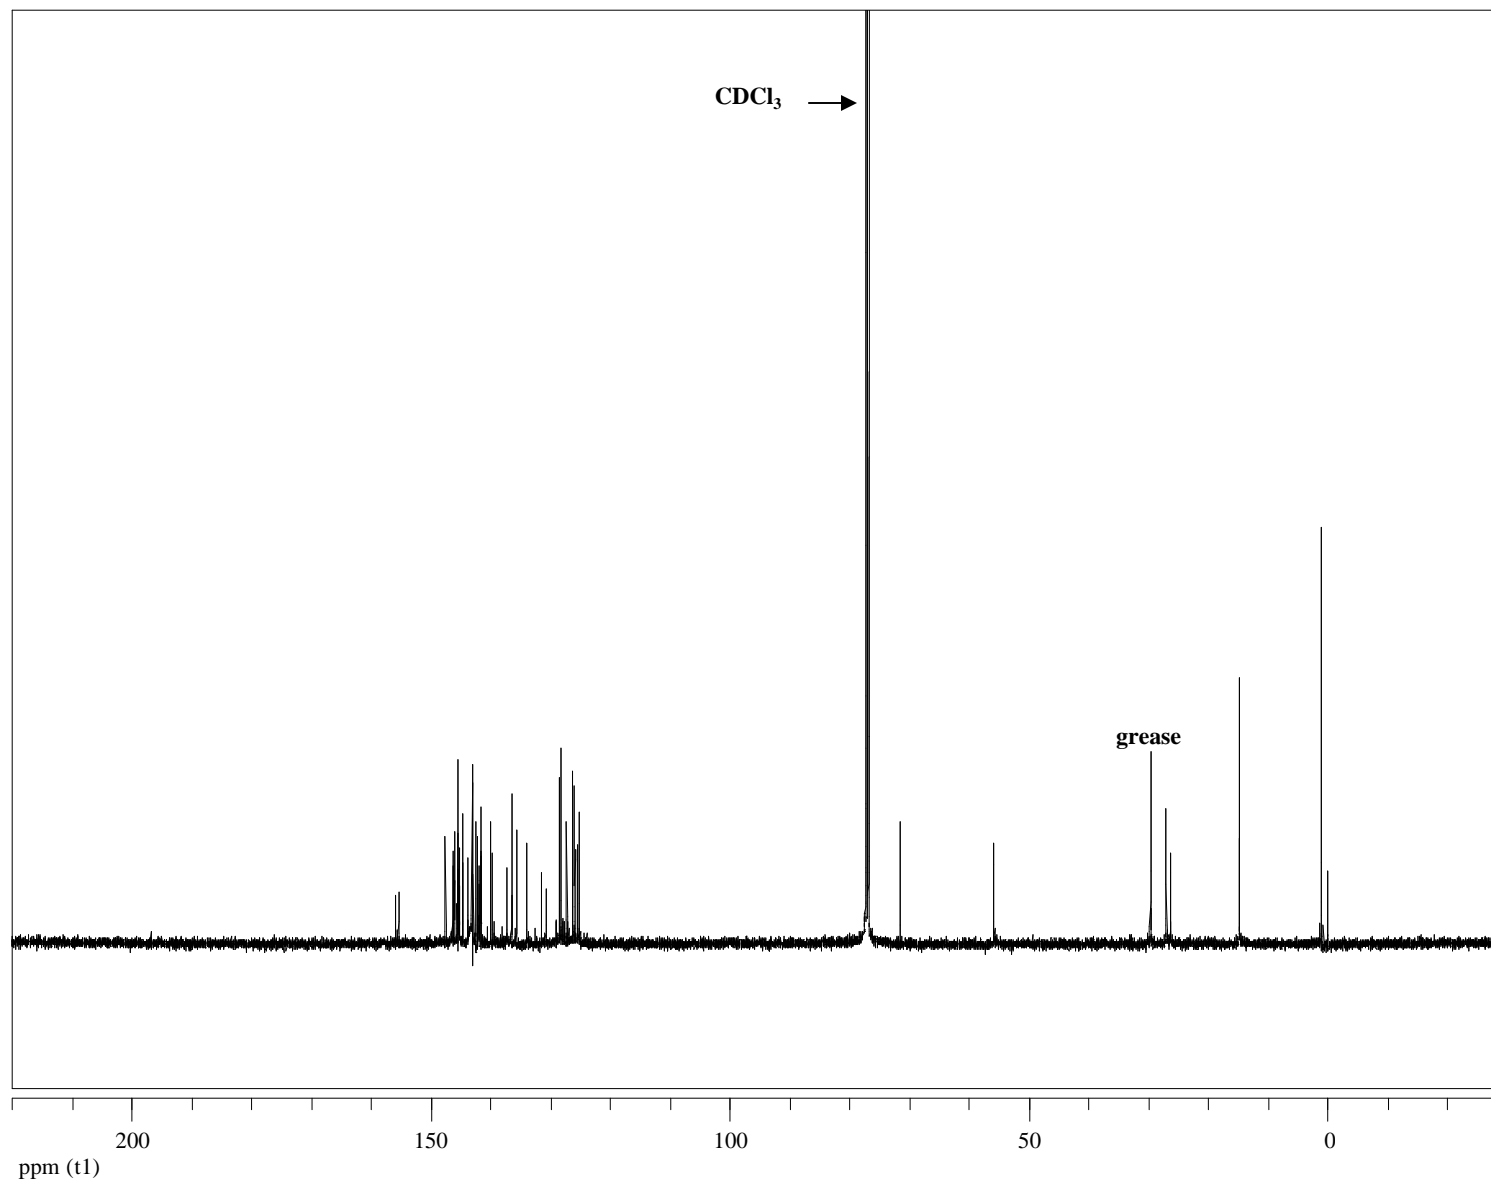

## [60]Fullerene-6,13-bis(2',6'-diethylphenyl)pentacene monoadduct (4)

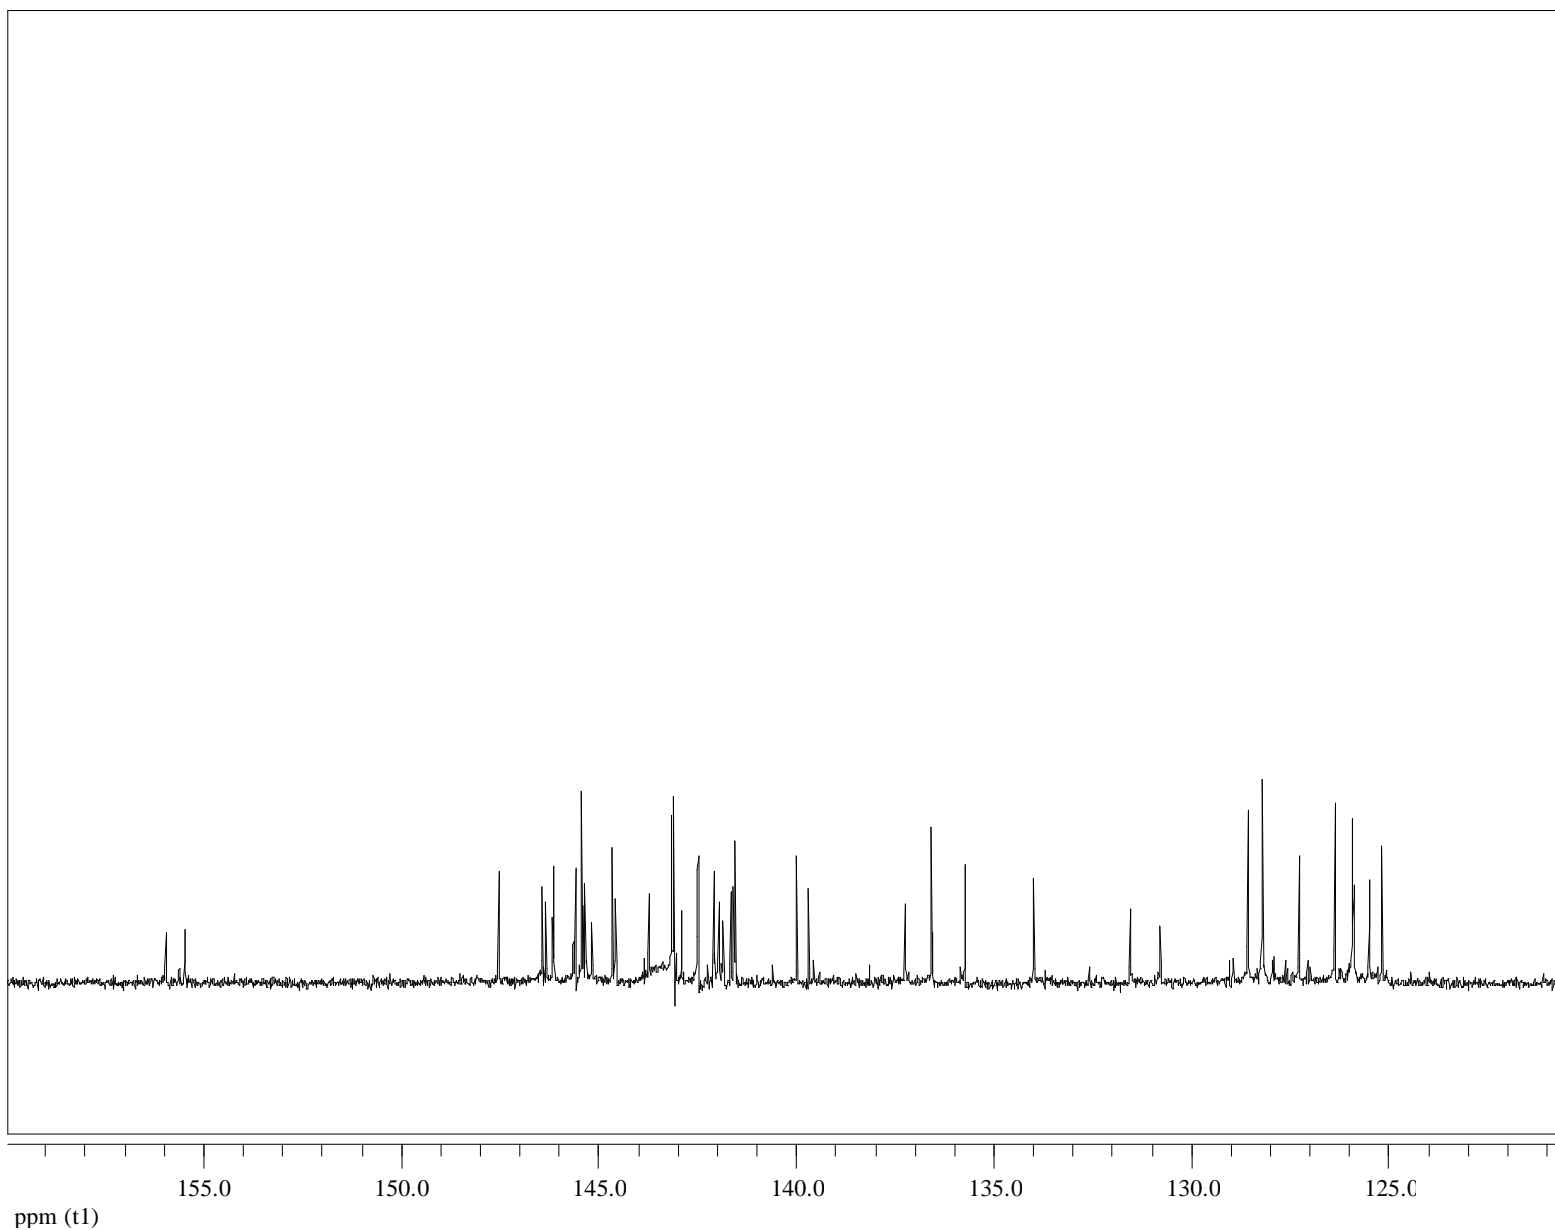

**Irvinder Kaur and Glen P. Miller University of New Hampshire**

## [60]Fullerene-6,13-bis(2',6'-diethylphenyl)pentacene monoadduct (4)

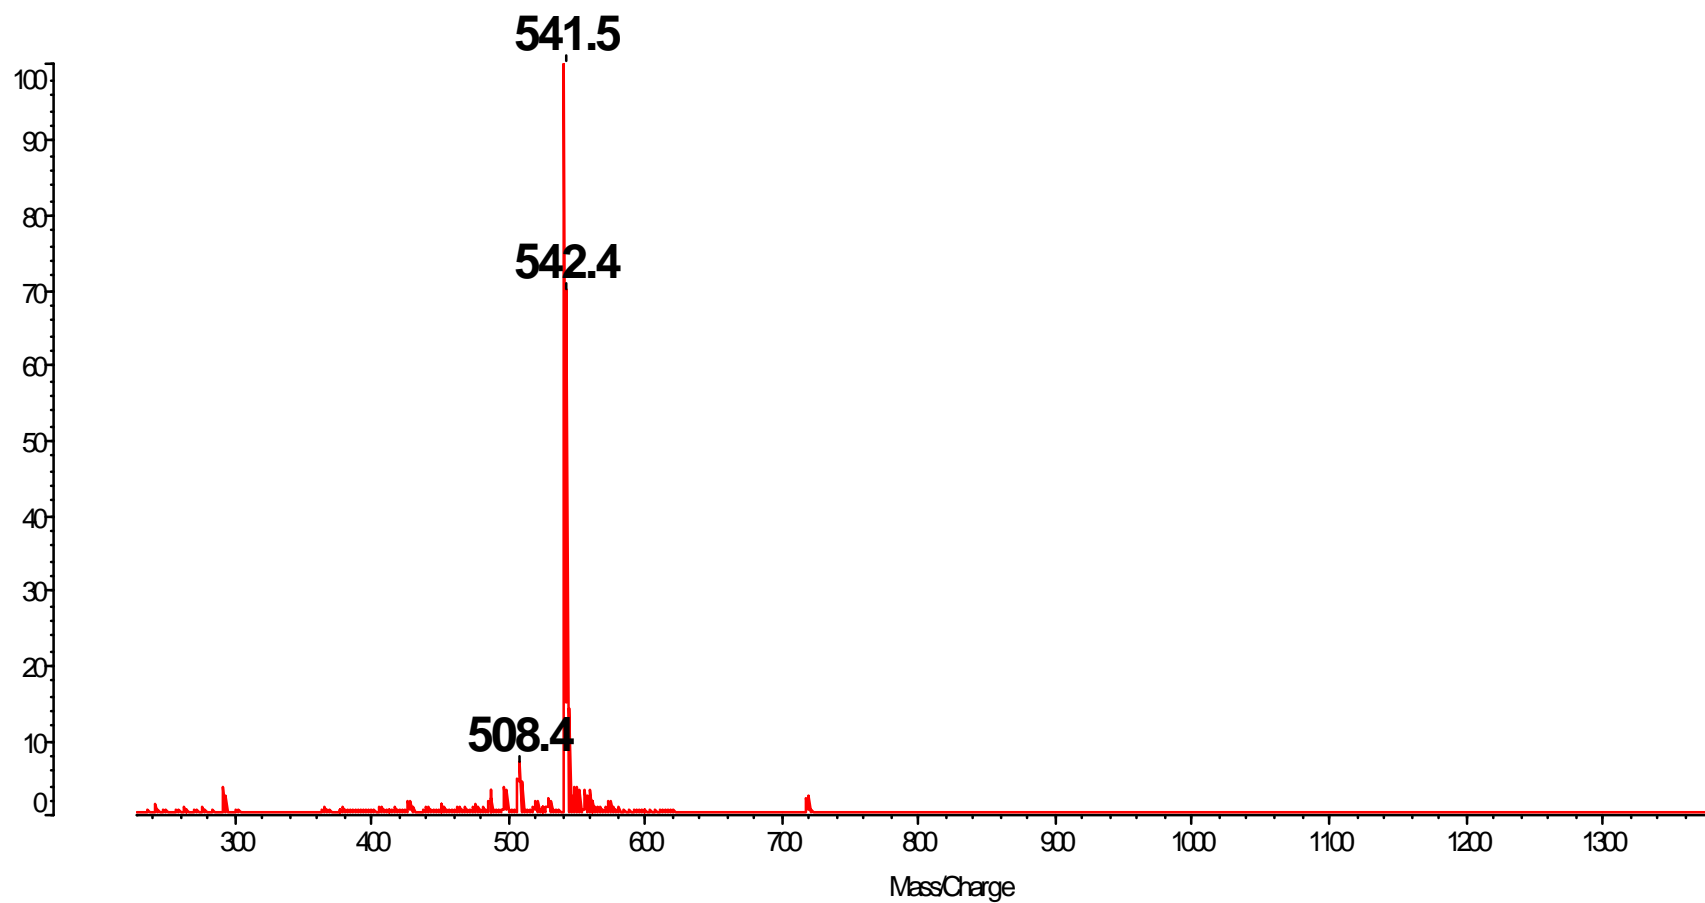

# [60]Fullerene-6,13-bis(2',6'-diethylphenyl)pentacene-dioxo bisadduct (*syn*-10)

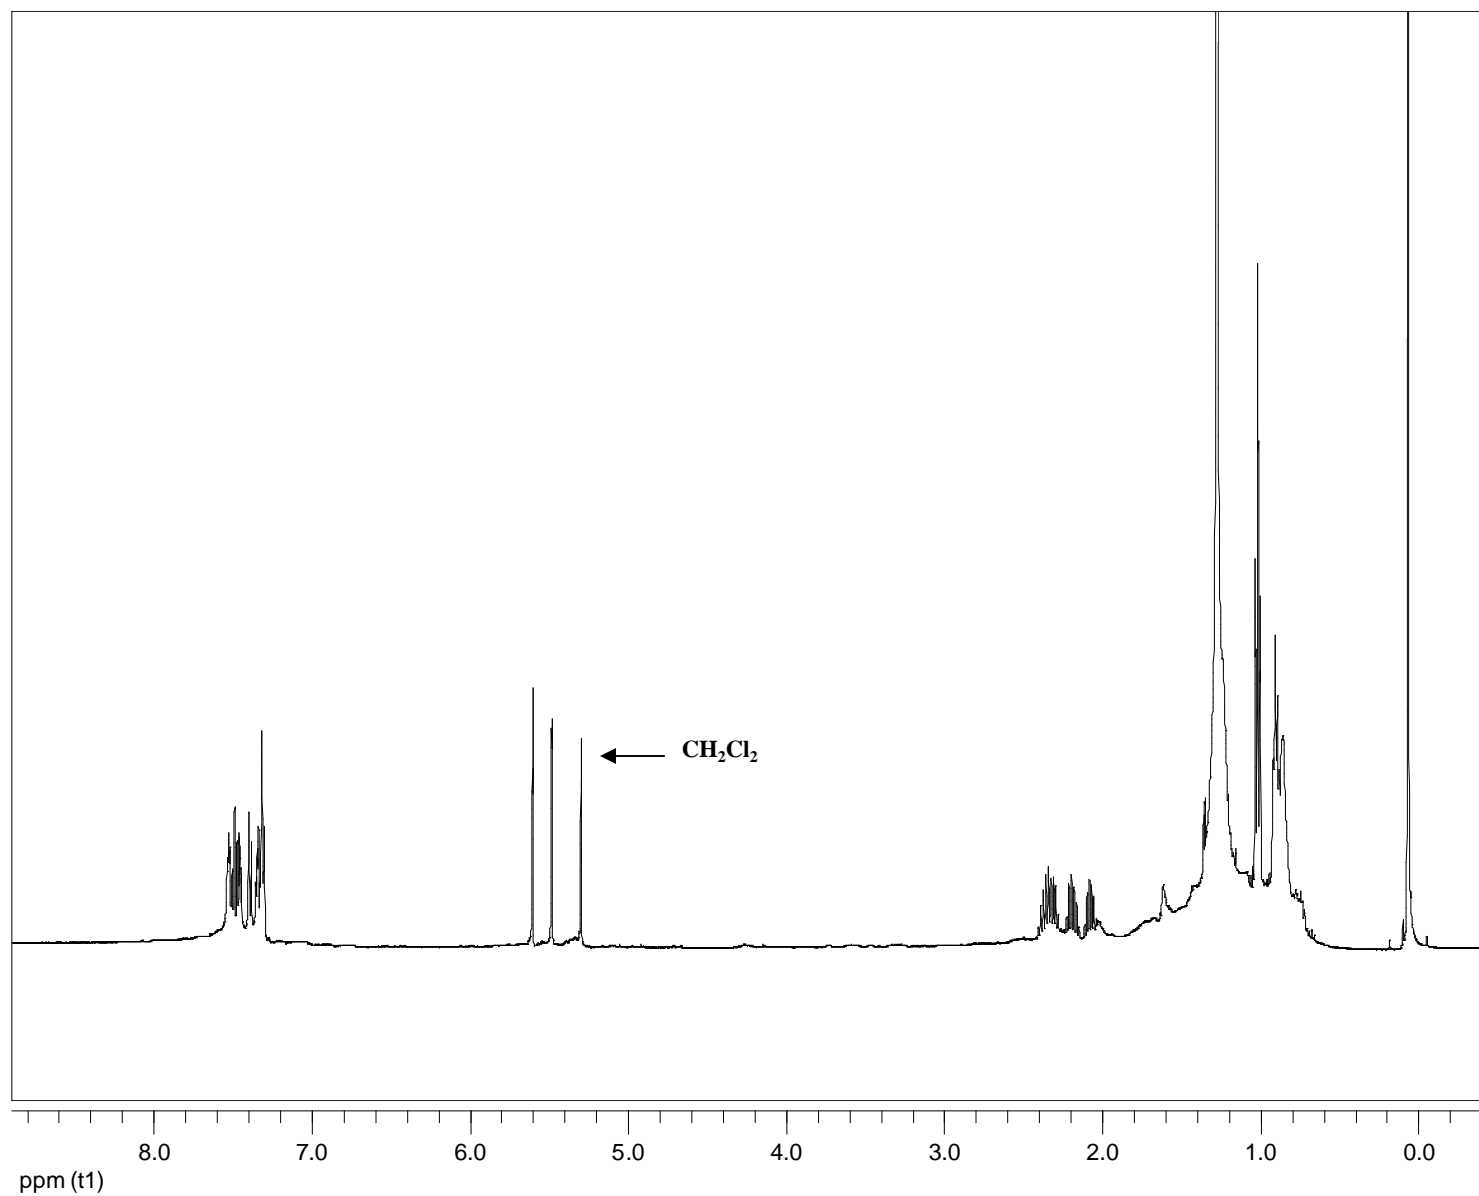

# [60]Fullerene-6,13-bis(2',6'-diethylphenyl)pentacene-dioxo bisadduct (*syn*-10)

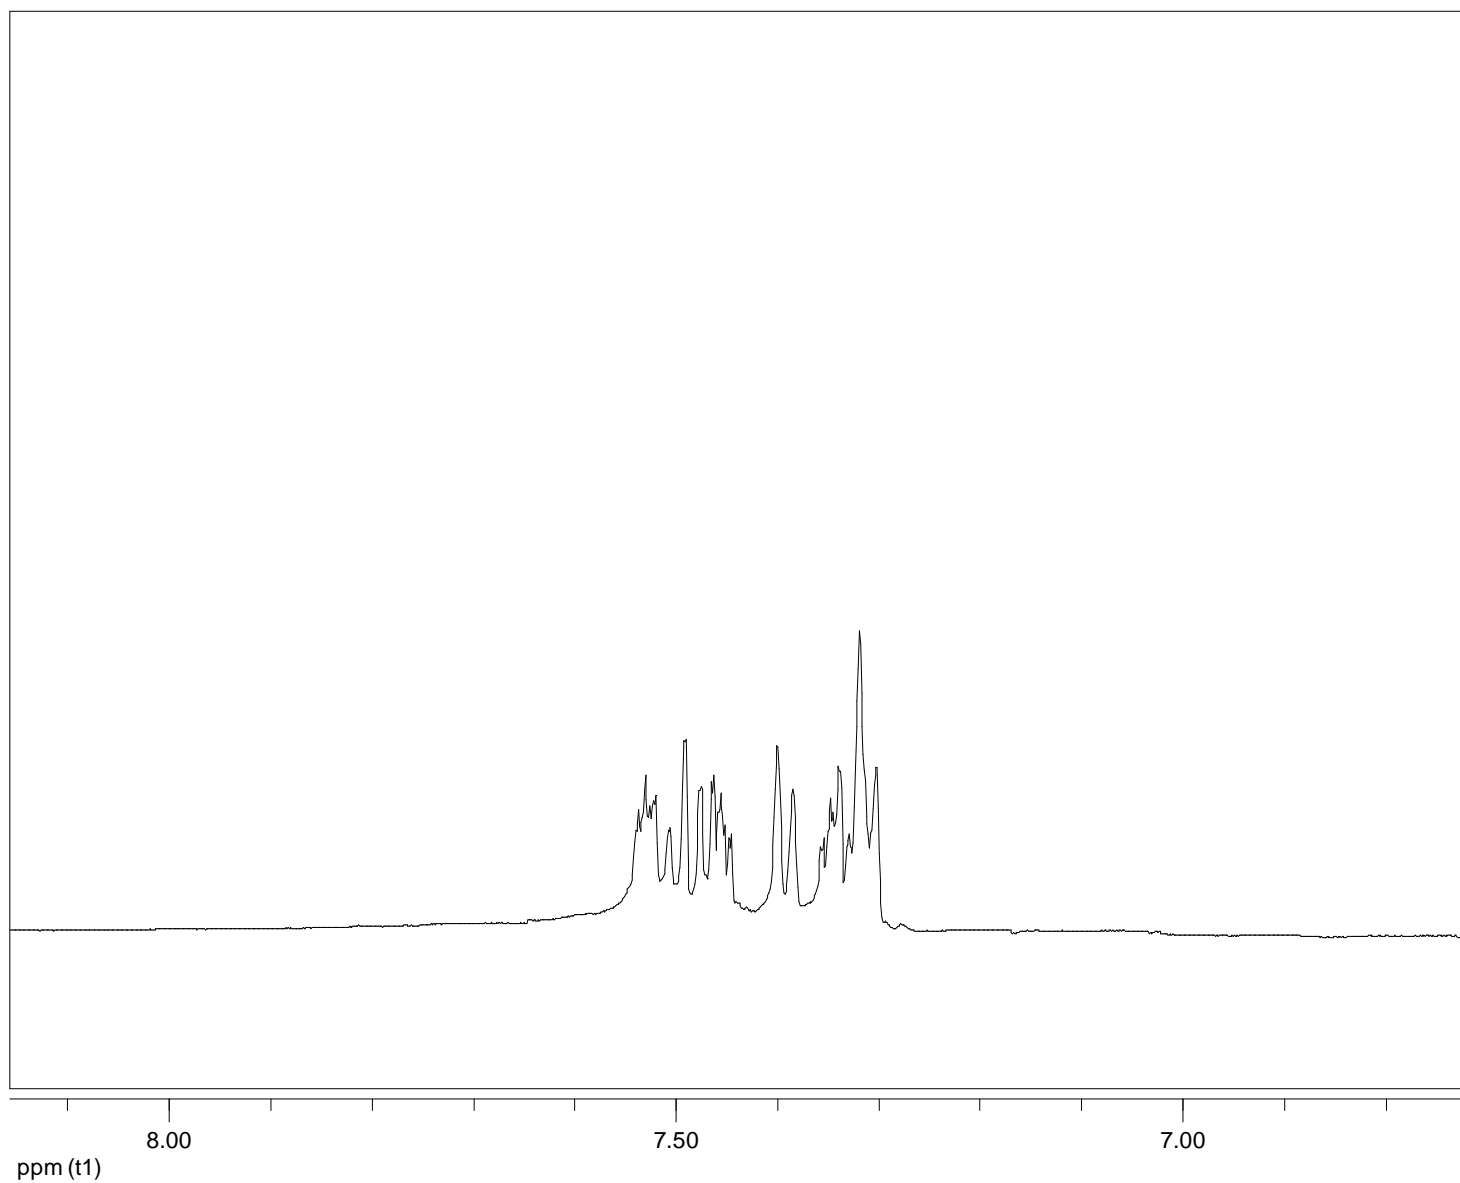

Irvinder Kaur and Glen P. Miller University of New Hampshire

# [60]Fullerene-6,13-bis(2',6'-diethylphenyl)pentacene-dioxo bisadduct (*syn*-10)

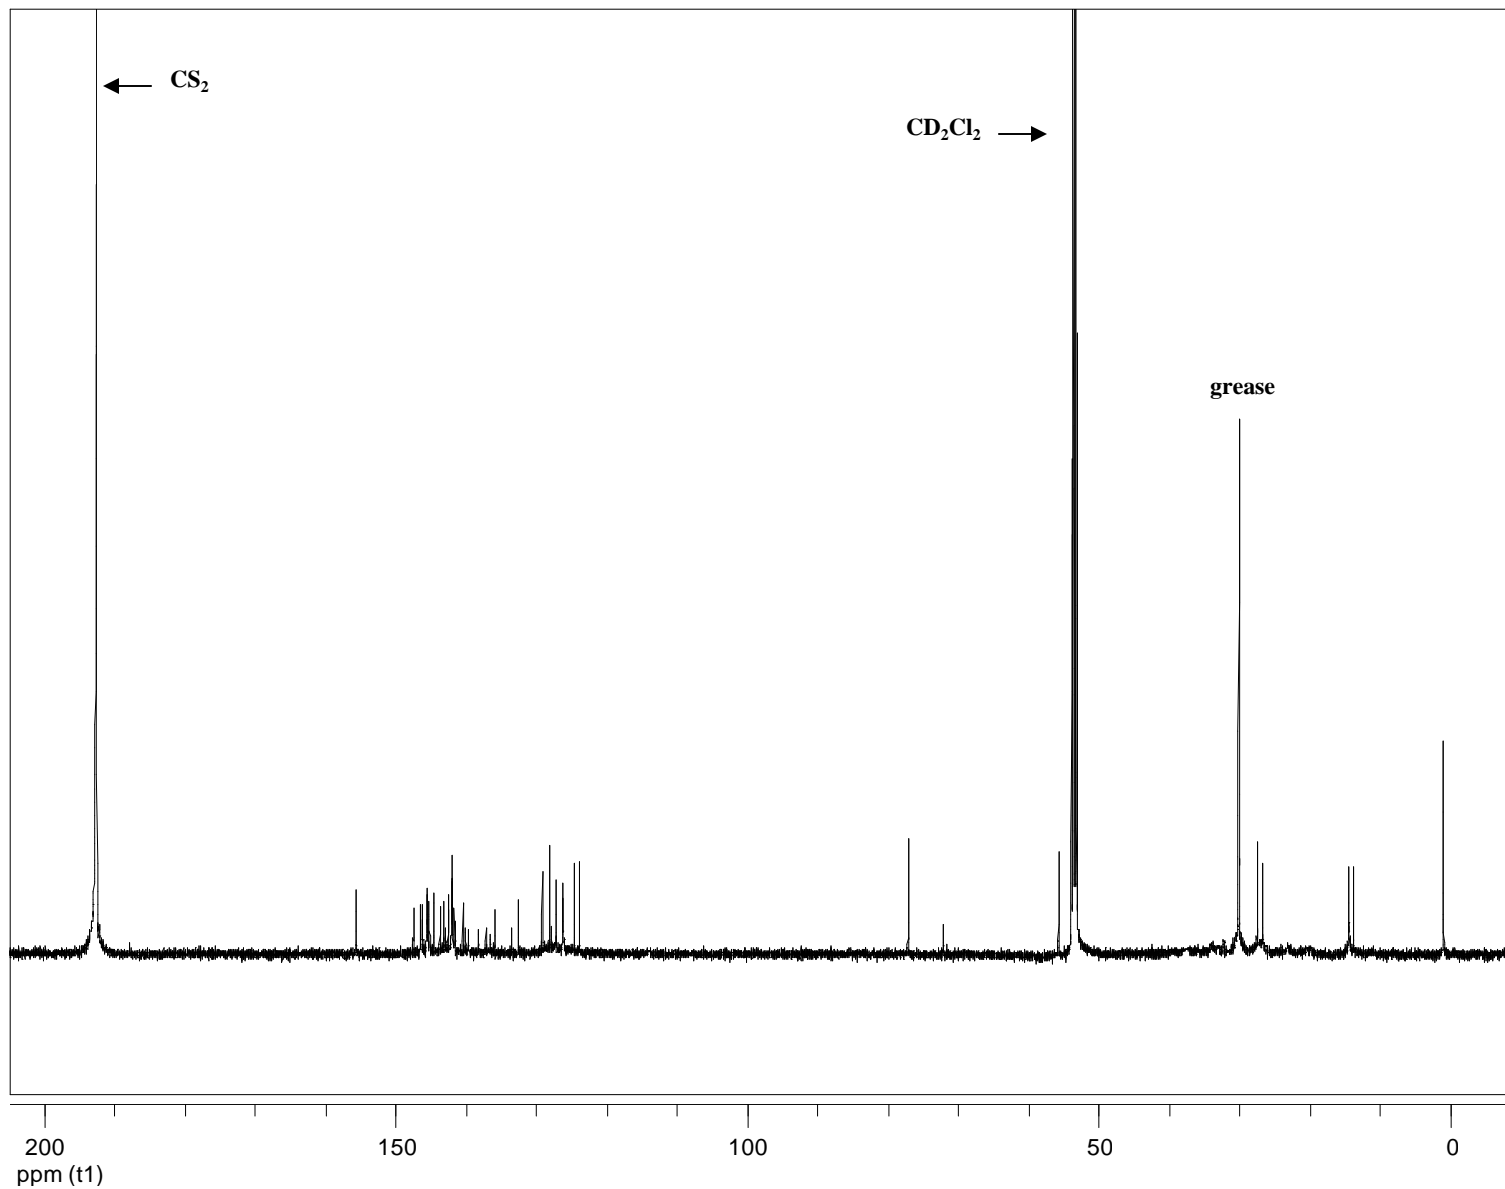



## [60]Fullerene-6,13-bis(2',6'-diethylphenyl)pentacene-dioxo bisadduct (*syn*-10)

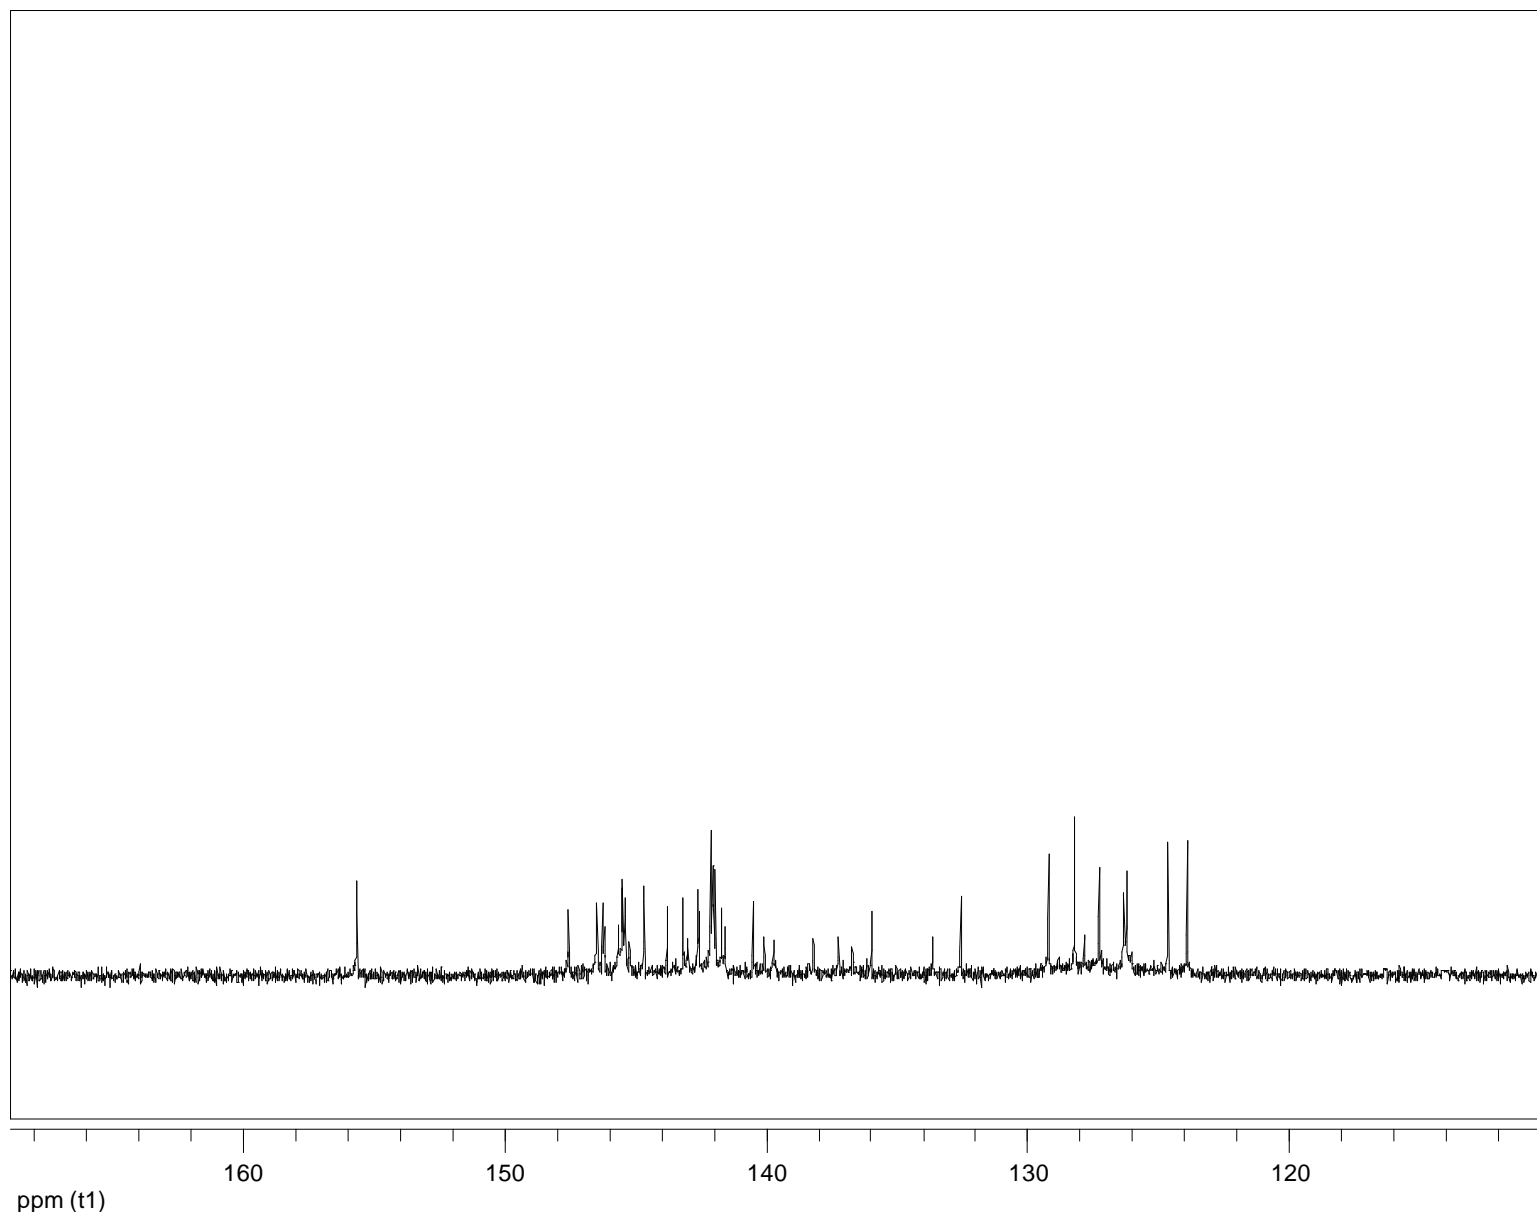

Irvinder Kaur and Glen P. Miller University of New Hampshire

## [60]Fullerene-6,13-bis(2',6'-diethylphenyl)pentacene-dioxo bisadduct (*syn*-10)

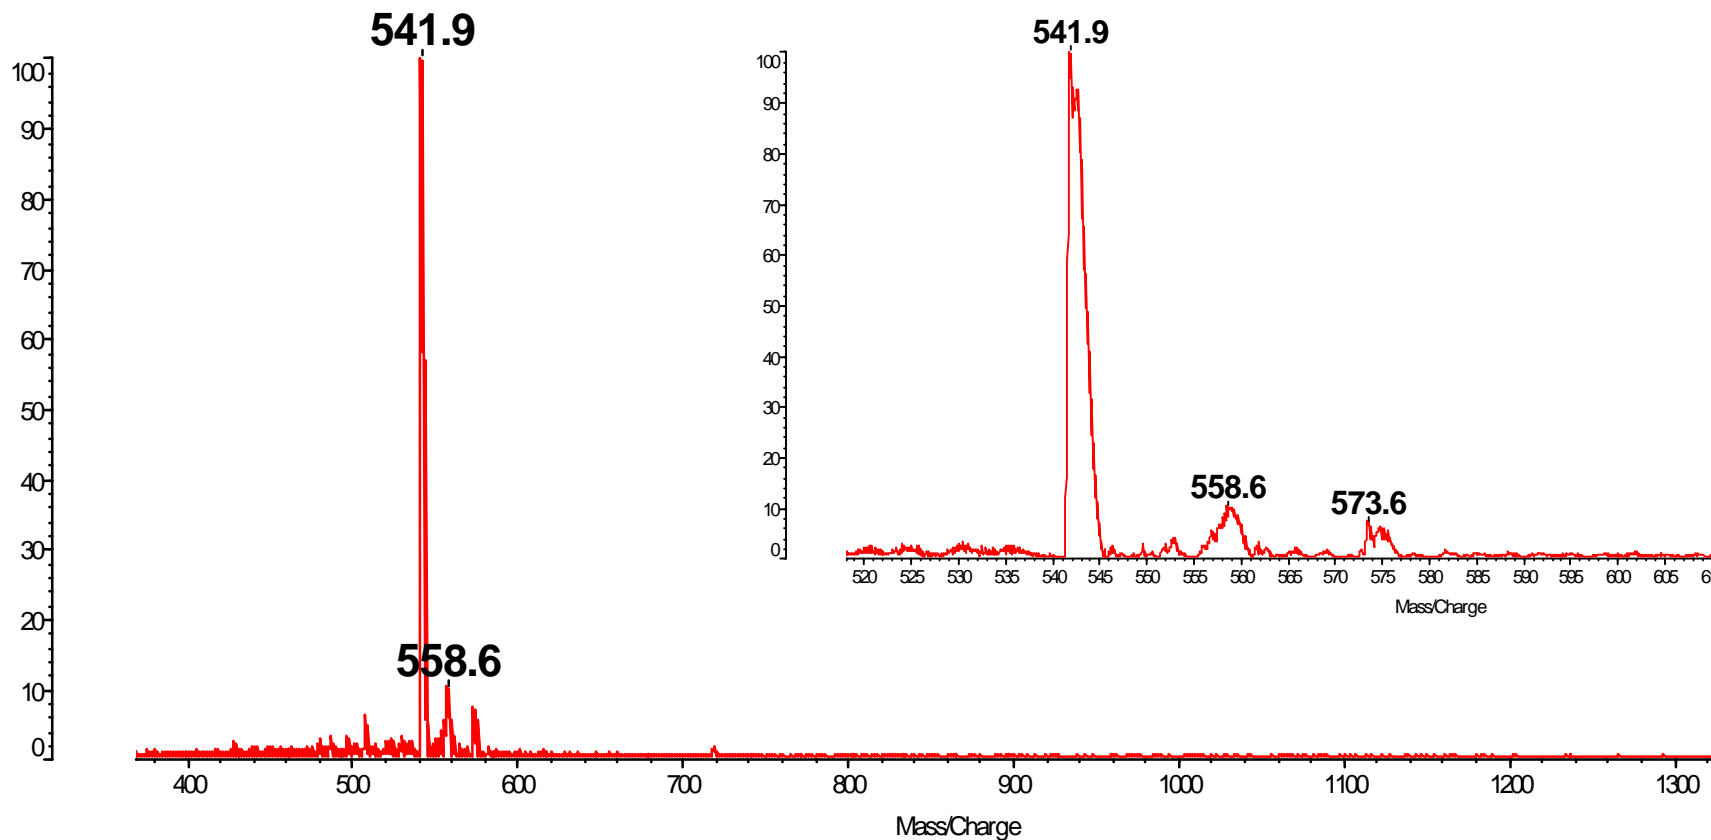

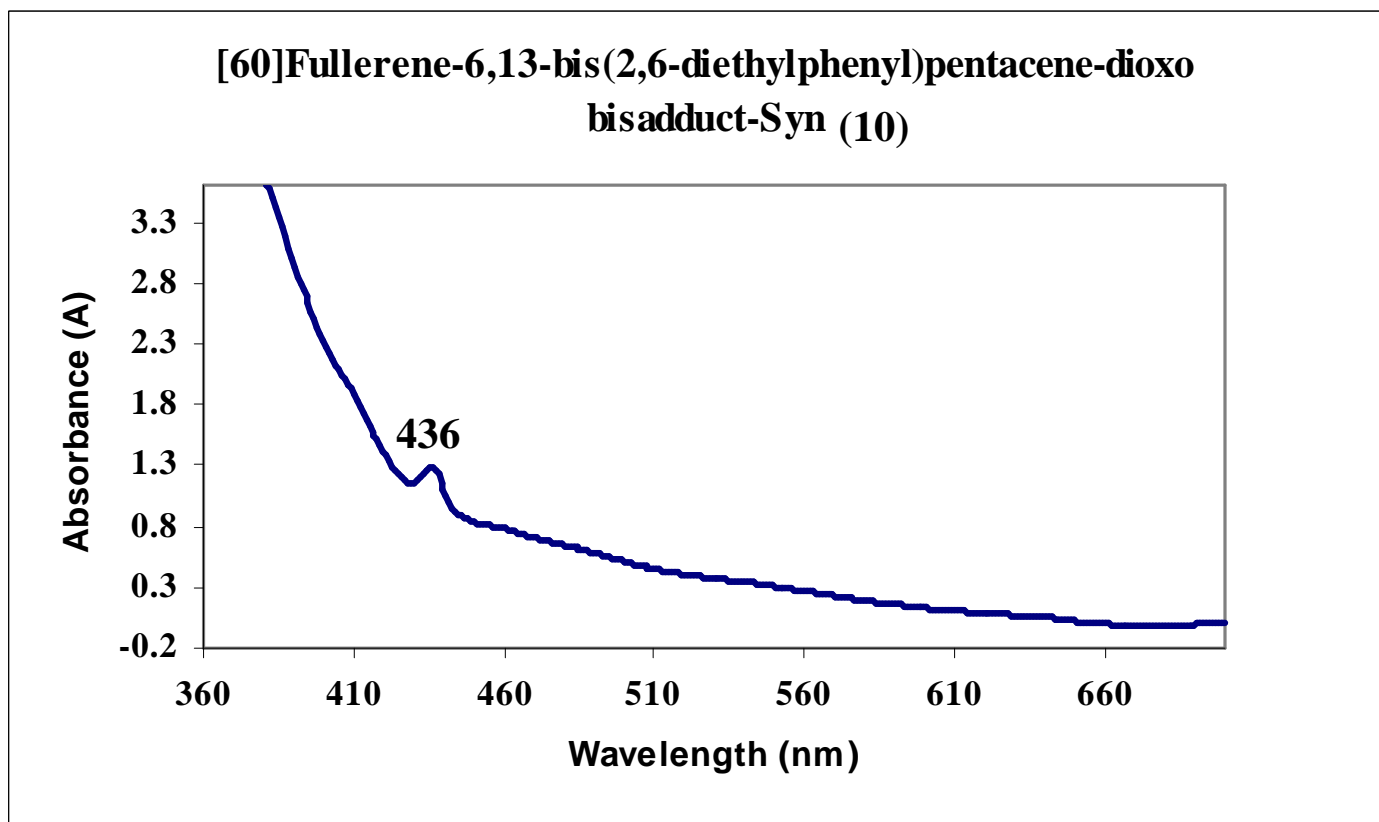

# [60]Fullerene-6,13-bis(2',6'-diethylphenyl)pentacene-dioxo bisadduct (*anti*-11)

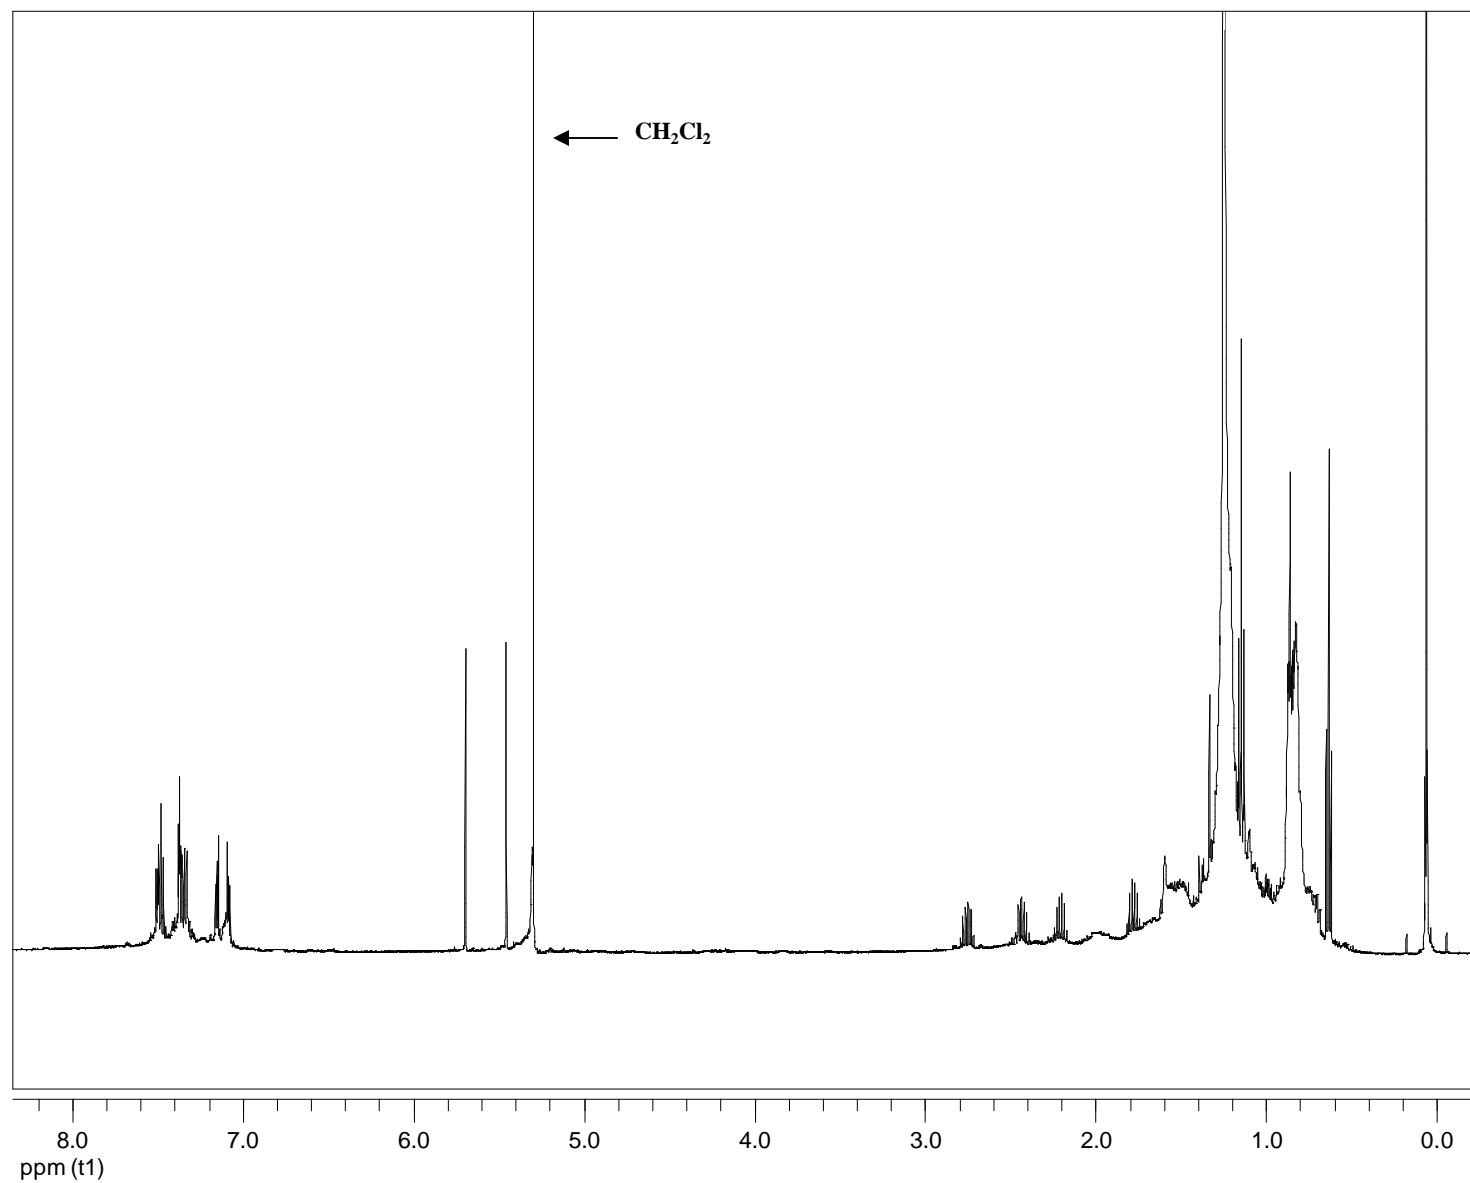

# [60]Fullerene-6,13-bis(2',6'-diethylphenyl)pentacene-dioxo bisadduct (*anti*-11)

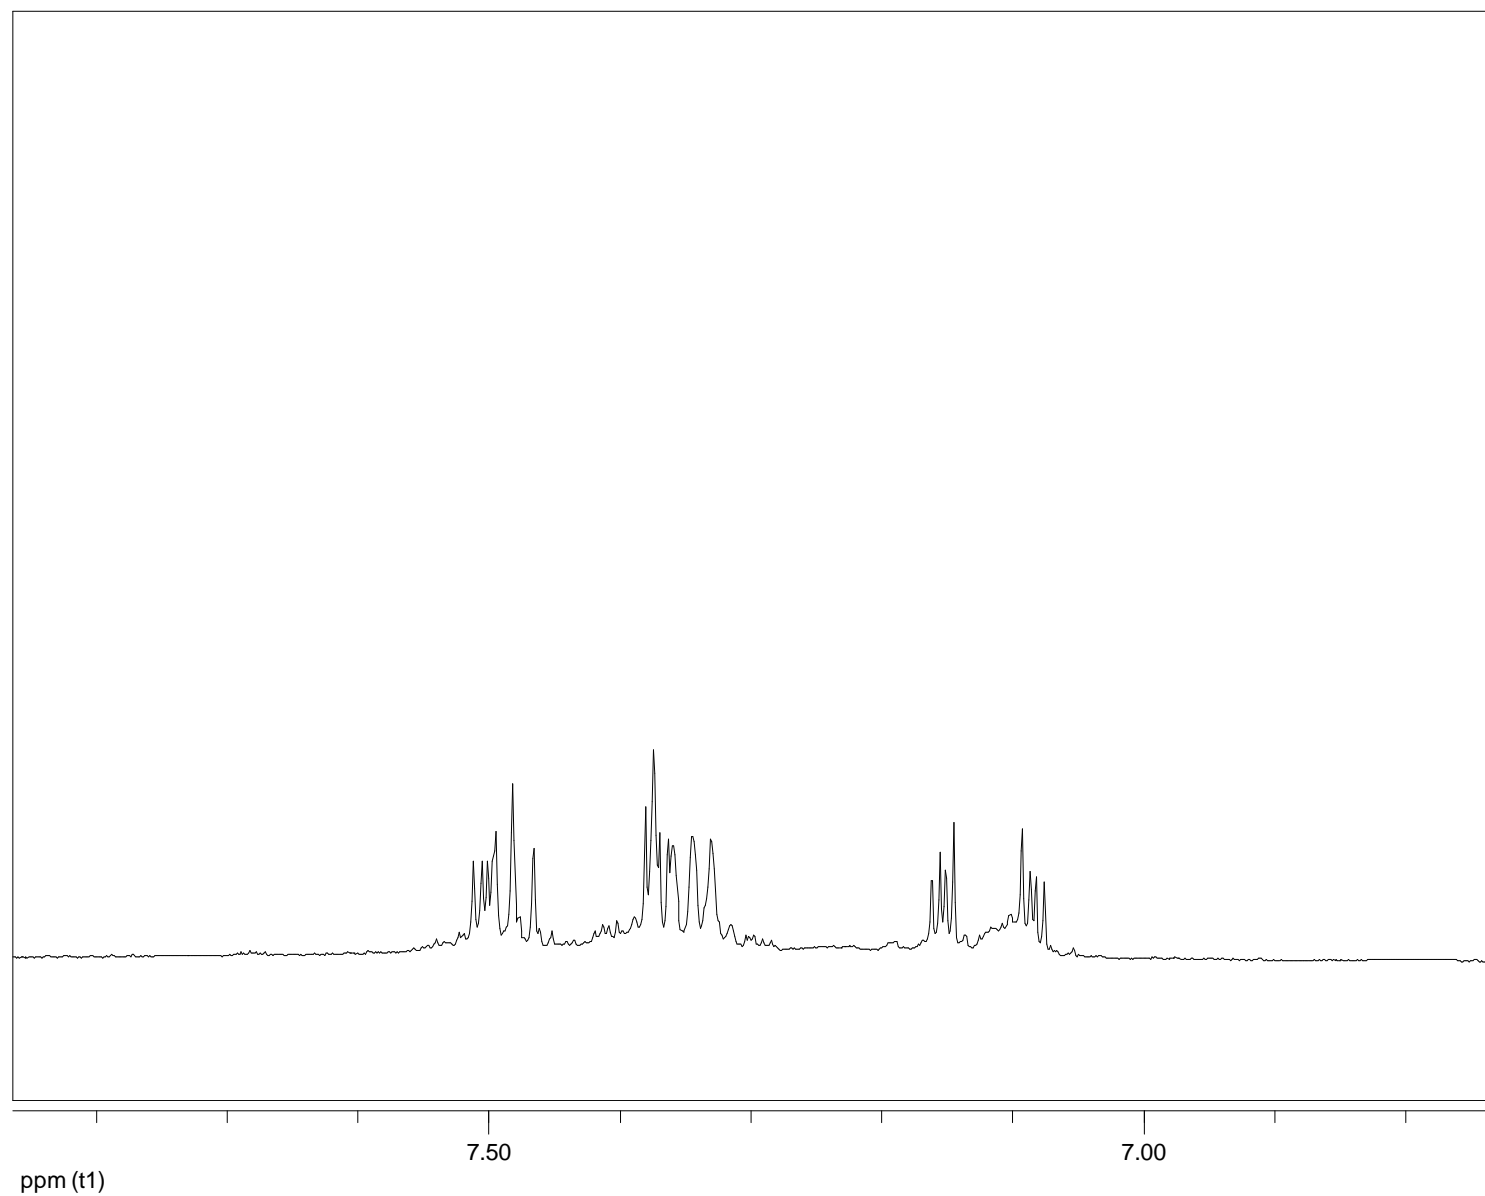

Irvinder Kaur and Glen P. Miller University of New Hampshire

# [60]Fullerene-6,13-bis(2',6'-diethylphenyl)pentacene-dioxo bisadduct (*anti*-11)

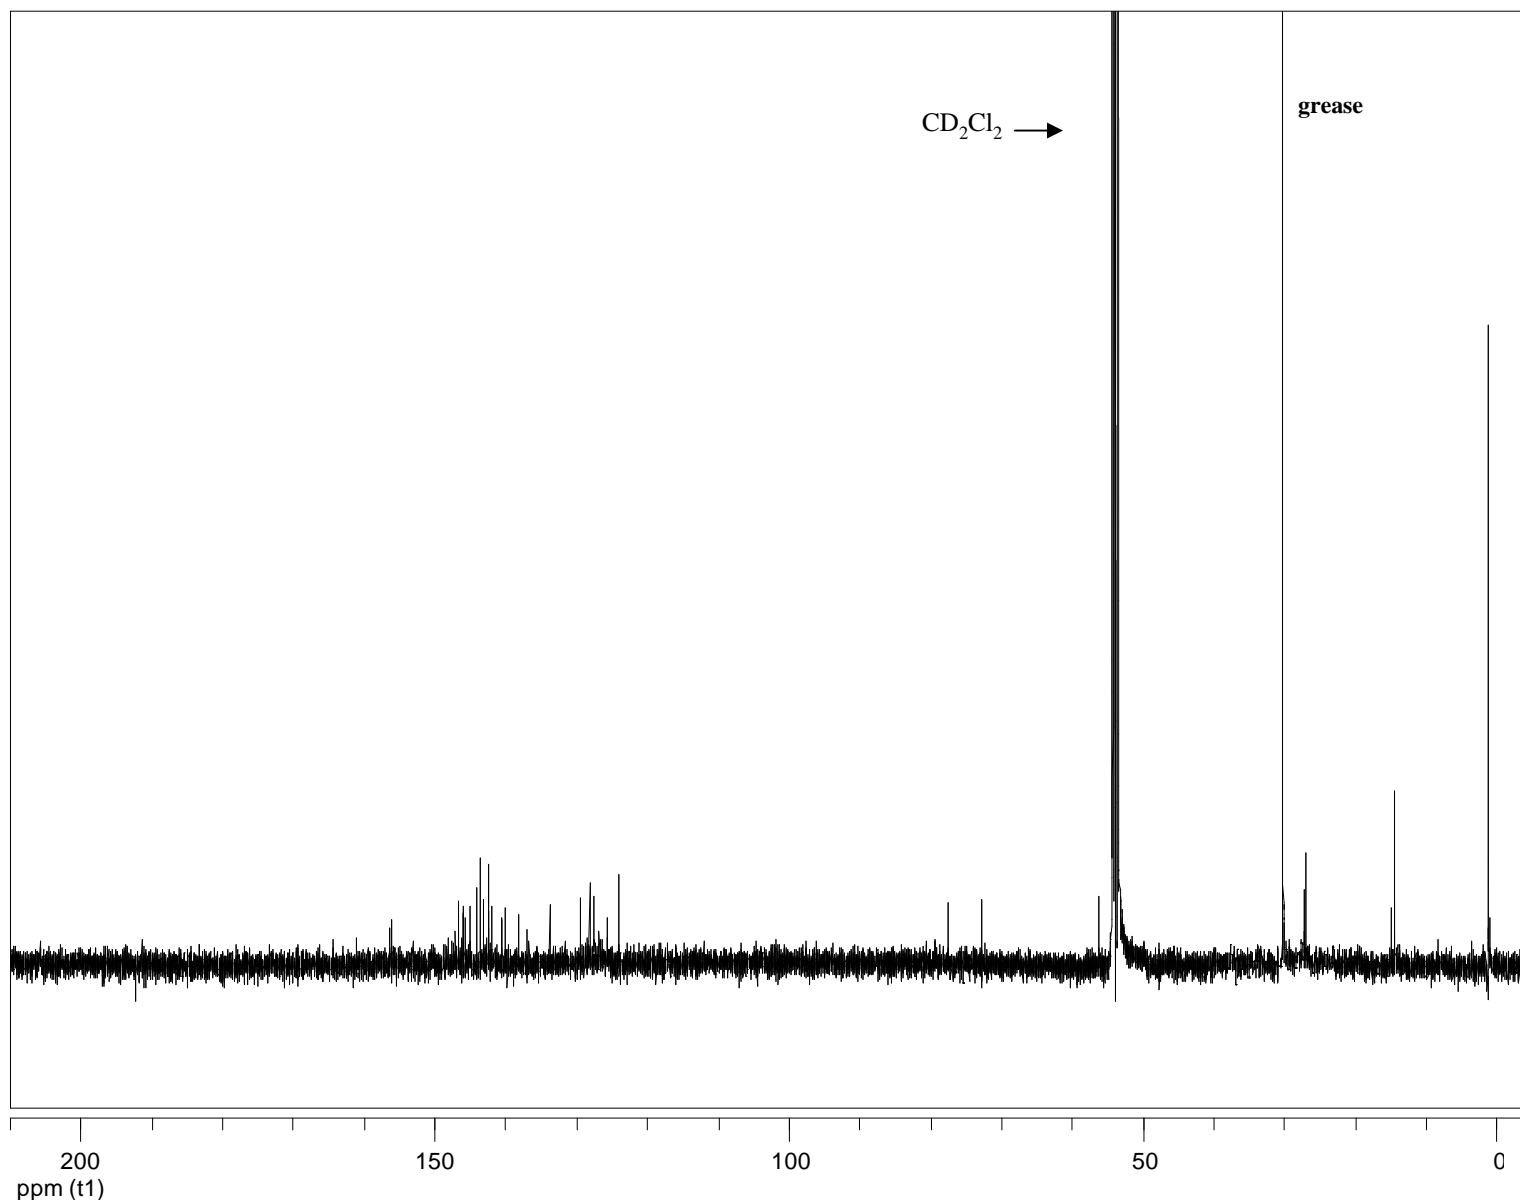

# [60]Fullerene-6,13-bis(2',6'-diethylphenyl)pentacene-dioxo bisadduct (*anti*-11)

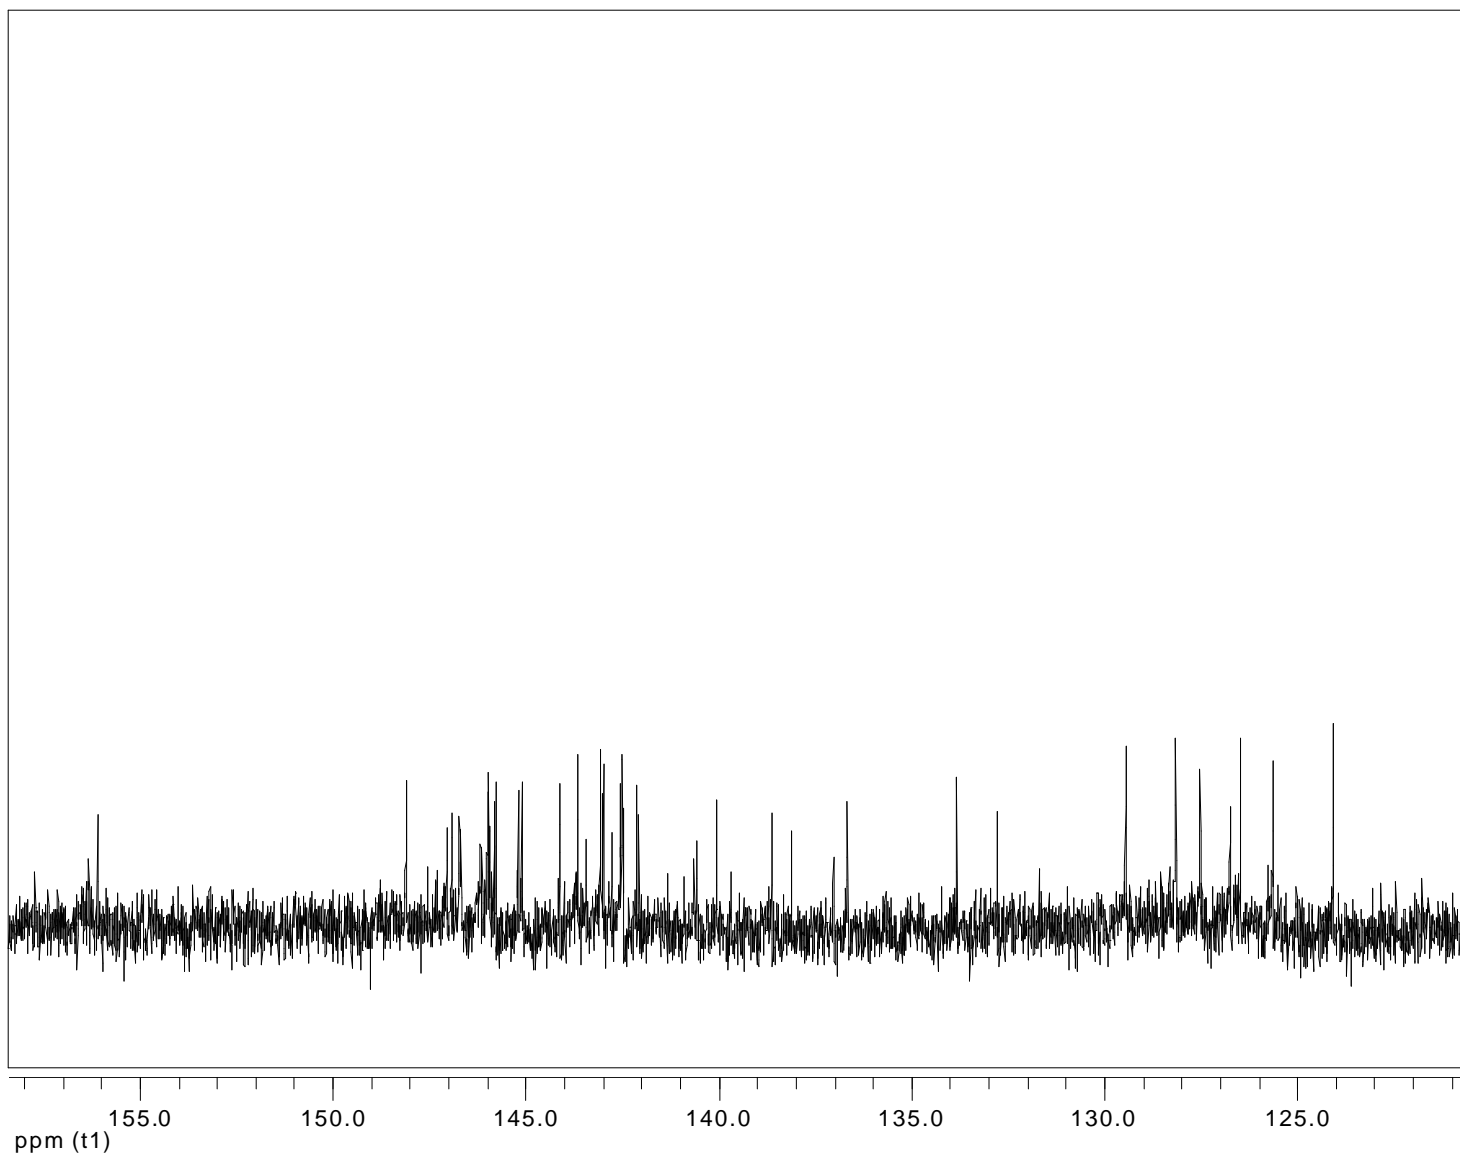

Irvinder Kaur and Glen P. Miller University of New Hampshire

# [60]Fullerene-6,13-bis(2',6'-diethylphenyl)pentacene-dioxo bisadduct (*anti*-11)

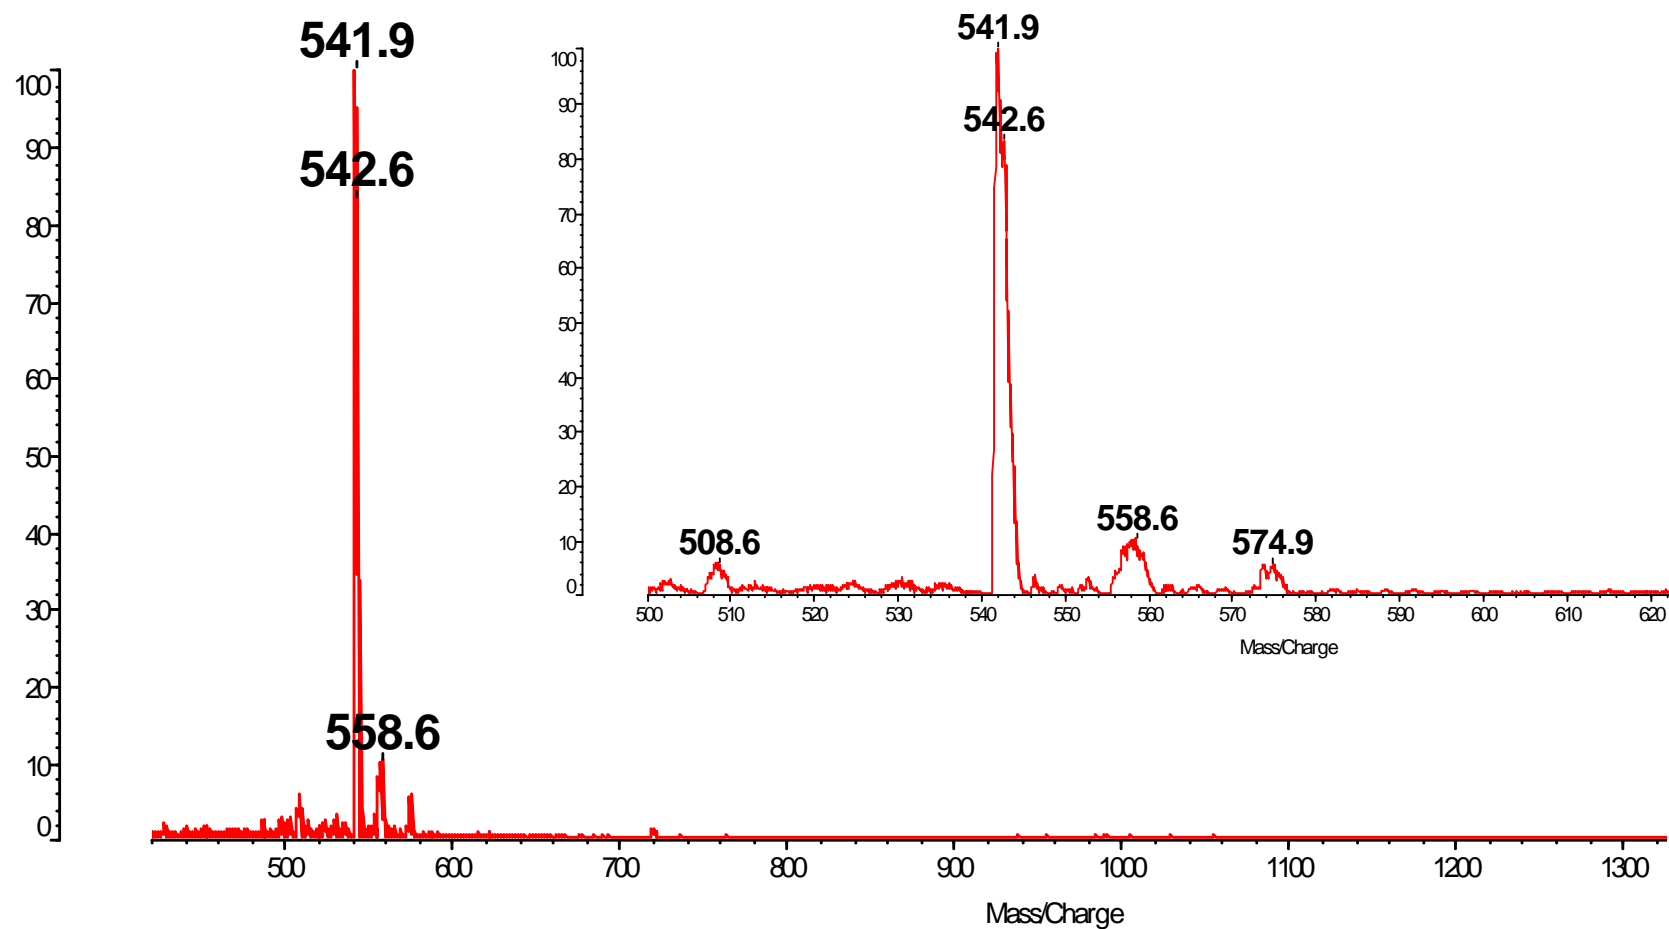



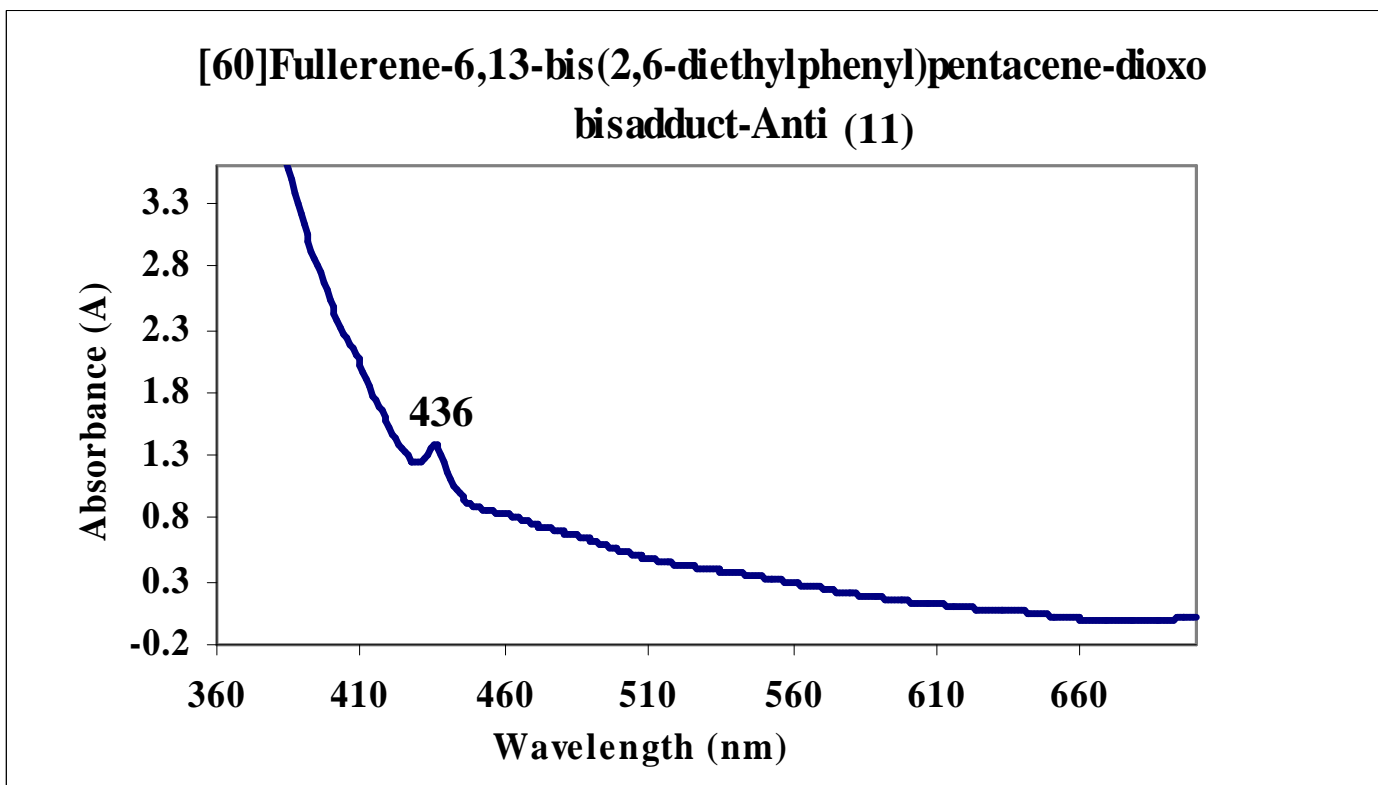

Supplement: b710300j.pdf [file b710300j.pdf]
